# Supplementary material for: High Throughput Transcriptome Data Analysis and Computational Verification Reveal Immunotherapy Biomarkers of Compound Kushen Injection for Treating Triple-Negative Breast Cancer
Source: Front Oncol. 2021 Sep 17;11:747300. doi: 10.3389/fonc.2021.747300 (PMC8484800; doi:10.3389/fonc.2021.747300)
Supplement: Supplementary file 7 [file Table_7.xlsx]

## Sheet: Sheet1
Supplementary table 7. The results of differential analysis between the immune clusters generated by limma.
Symbol	Entrez ID	logFC	AveExpr	t	P.Value	adj.P.Val	B	Change	Group
ABCA1	19	0.930878	9.40497	11.22	1.35935e-24	5.79689e-23	44.9698	up	Immunity_high vs Immunity_low
ABCA3	21	-0.633273	7.03147	-4.63724	5.29719e-06	3.31056e-05	2.88756	down	Immunity_high vs Immunity_low
ABCA6	23460	0.662283	5.96725	9.73863	1.2459e-19	3.94078e-18	33.654	up	Immunity_high vs Immunity_low
ABCB1	5243	0.664823	6.01713	12.0497	1.71018e-27	8.55925e-26	51.593	up	Immunity_high vs Immunity_low
ABCG1	9619	0.695362	6.72247	8.62458	3.92513e-16	9.74508e-15	25.6949	up	Immunity_high vs Immunity_low
ABI3	51225	0.969824	6.75593	16.572	3.89977e-44	5.08486e-42	89.6577	up	Immunity_high vs Immunity_low
ABI3BP	25890	1.65234	6.85227	13.4165	2.07077e-32	1.3598e-30	62.8315	up	Immunity_high vs Immunity_low
ACACA	31	-0.603721	8.94897	-6.06742	3.95134e-09	4.52967e-08	9.85976	down	Immunity_high vs Immunity_low
ACAP1	9744	1.64493	6.9711	15.6122	1.54262e-40	1.60681e-38	81.4253	up	Immunity_high vs Immunity_low
ACKR1	2532	1.79697	7.13669	9.67901	1.9421e-19	6.02716e-18	33.2149	up	Immunity_high vs Immunity_low
ACP5	54	1.29116	7.31782	9.23811	4.95775e-18	1.40397e-16	30.0119	up	Immunity_high vs Immunity_low
ACSL4	2182	0.850752	7.38084	9.64611	2.47984e-19	7.64365e-18	32.9732	up	Immunity_high vs Immunity_low
ACSL5	51703	1.19056	8.08194	11.1241	2.90781e-24	1.20874e-22	44.216	up	Immunity_high vs Immunity_low
ACTR3B	57180	-1.13263	7.02379	-6.324	9.33825e-10	1.18354e-08	11.2674	down	Immunity_high vs Immunity_low
ACVRL1	94	0.669367	6.32365	10.5547	2.51322e-22	9.27689e-21	39.7973	up	Immunity_high vs Immunity_low
ADA	100	0.901011	8.08737	10.4805	4.45943e-22	1.60681e-20	39.2294	up	Immunity_high vs Immunity_low
ADAM15	8751	-0.730077	11.6392	-6.10582	3.19286e-09	3.72378e-08	10.0676	down	Immunity_high vs Immunity_low
ADAM19	8728	0.810242	8.25814	7.50161	7.347e-13	1.35048e-11	18.2732	up	Immunity_high vs Immunity_low
ADAM7	8756	0.994609	6.01794	16.6675	1.70801e-44	2.29304e-42	90.4784	up	Immunity_high vs Immunity_low
ADAM8	101	0.704093	6.8563	7.85993	7.12291e-14	1.47369e-12	20.5687	up	Immunity_high vs Immunity_low
ADAMDEC1	27299	2.249	7.73552	14.817	1.42566e-37	1.23041e-35	74.6391	up	Immunity_high vs Immunity_low
ADAP1	11033	0.666548	8.31299	4.78416	2.70873e-06	1.80092e-05	3.53162	up	Immunity_high vs Immunity_low
ADAP2	55803	1.16394	8.39372	13.1955	1.32105e-31	8.19956e-30	60.9913	up	Immunity_high vs Immunity_low
ADCY4	196883	0.642102	6.87629	5.50037	8.18048e-08	7.44666e-07	6.91258	up	Immunity_high vs Immunity_low
ADGRE5	976	1.56929	8.68125	17.4349	2.24395e-47	3.91051e-45	97.0734	up	Immunity_high vs Immunity_low
ADH1A	124	1.22261	6.78007	5.18841	3.93483e-07	3.12843e-06	5.39159	up	Immunity_high vs Immunity_low
ADORA1	134	-0.830285	6.9053	-6.01057	5.40735e-09	6.0421e-08	9.554	down	Immunity_high vs Immunity_low
ADRB2	154	1.00655	6.48424	12.456	6.12731e-29	3.37542e-27	54.8965	up	Immunity_high vs Immunity_low
AFDN	4301	-0.841472	8.69728	-6.21493	1.73329e-09	2.10409e-08	10.6636	down	Immunity_high vs Immunity_low
AGAP1	116987	-0.630223	7.97279	-7.71179	1.8849e-13	3.7254e-12	19.6111	down	Immunity_high vs Immunity_low
AGBL5	60509	-0.883137	7.84239	-8.94166	4.18454e-17	1.11041e-15	27.9047	down	Immunity_high vs Immunity_low
AGO2	27161	-0.801945	9.57523	-5.88421	1.07755e-08	1.14274e-07	8.88244	down	Immunity_high vs Immunity_low
AHCY	191	-0.640831	9.46774	-5.22358	3.30785e-07	2.6776e-06	5.5594	down	Immunity_high vs Immunity_low
AIF1	199	1.64555	8.10894	15.7187	6.16153e-41	6.68692e-39	82.3374	up	Immunity_high vs Immunity_low
AIF1L	83543	-0.997159	7.72581	-6.28456	1.16889e-09	1.45701e-08	11.0482	down	Immunity_high vs Immunity_low
AIM2	9447	1.57185	7.03733	12.2502	3.32395e-28	1.72617e-26	53.2183	up	Immunity_high vs Immunity_low
AK4	205	-0.619704	8.51236	-3.4511	0.000639259	0.00245153	-1.65507	down	Immunity_high vs Immunity_low
AKNA	80709	1.54616	7.76302	15.5714	2.1915e-40	2.25674e-38	81.0763	up	Immunity_high vs Immunity_low
AKR1B1	231	0.808167	9.23285	7.59228	4.09753e-13	7.76004e-12	18.8473	up	Immunity_high vs Immunity_low
ALDH1A1	216	1.47227	7.53827	9.70152	1.64269e-19	5.15088e-18	33.3805	up	Immunity_high vs Immunity_low
ALDH2	217	0.881952	8.64489	6.83195	4.74171e-11	7.14371e-10	14.1832	up	Immunity_high vs Immunity_low
ALDH7A1	501	-0.611177	9.20293	-6.46001	4.27185e-10	5.70546e-09	12.0317	down	Immunity_high vs Immunity_low
ALKBH2	121642	-0.680178	7.81216	-7.5519	5.31734e-13	9.96603e-12	18.5911	down	Immunity_high vs Immunity_low
ALOX5	240	1.43747	9.21705	14.0666	8.54706e-35	6.19628e-33	68.2844	up	Immunity_high vs Immunity_low
ALOX5AP	241	1.70126	9.80768	12.0453	1.7719e-27	8.82248e-26	51.5578	up	Immunity_high vs Immunity_low
ALPK2	115701	0.736003	6.56518	6.68226	1.16053e-10	1.65098e-09	13.3066	up	Immunity_high vs Immunity_low
ALPL	249	1.31197	8.31892	7.27094	3.17858e-12	5.49176e-11	16.8342	up	Immunity_high vs Immunity_low
ANKRD22	118932	0.588301	6.92532	4.72103	3.62077e-06	2.35376e-05	3.25276	up	Immunity_high vs Immunity_low
ANKRD29	147463	0.745703	6.1893	8.03056	2.28896e-14	4.91529e-13	21.6865	up	Immunity_high vs Immunity_low
ANTXR2	118429	0.931551	8.05987	10.6164	1.5571e-22	5.80678e-21	40.2716	up	Immunity_high vs Immunity_low
ANXA2R	389289	1.16545	7.53518	10.2132	3.4707e-21	1.17796e-19	37.1975	up	Immunity_high vs Immunity_low
ANXA8	653145	-1.04156	7.37692	-4.20253	3.4951e-05	0.000182131	1.08477	down	Immunity_high vs Immunity_low
AOX1	316	0.639712	6.05038	6.74103	8.17974e-11	1.19556e-09	13.6491	up	Immunity_high vs Immunity_low
AP1S2	8905	1.10502	8.33722	11.9209	4.87372e-27	2.31841e-25	50.554	up	Immunity_high vs Immunity_low
APBB1IP	54518	1.66865	8.16887	21.8561	8.5091e-64	7.04255e-61	134.651	up	Immunity_high vs Immunity_low
APLNR	187	0.756841	7.8868	6.54009	2.68077e-10	3.68077e-09	12.4873	up	Immunity_high vs Immunity_low
APOBEC3F	200316	1.21183	6.70483	16.4138	1.53102e-43	1.87488e-41	88.2984	up	Immunity_high vs Immunity_low
APOBEC3G	60489	1.96599	7.32541	20.9701	1.50085e-60	1.04621e-57	127.224	up	Immunity_high vs Immunity_low
APOBEC3H	164668	0.83845	6.06885	13.21	1.16982e-31	7.33627e-30	61.112	up	Immunity_high vs Immunity_low
APOC1	341	1.62752	10.2644	10.4198	7.12052e-22	2.50587e-20	38.7659	up	Immunity_high vs Immunity_low
APOC2	344	0.749275	6.4265	7.04152	1.3237e-11	2.14012e-10	15.4341	up	Immunity_high vs Immunity_low
APOE	348	1.25947	11.868	10.4568	5.3531e-22	1.9136e-20	39.0485	up	Immunity_high vs Immunity_low
APP	351	-0.667797	10.5214	-3.66846	0.000289109	0.00120294	-0.912862	down	Immunity_high vs Immunity_low
AQP9	366	0.690121	6.9484	4.22351	3.20179e-05	0.00016869	1.16818	up	Immunity_high vs Immunity_low
ARHGAP15	55843	2.00763	7.96699	21.8999	5.88705e-64	5.33484e-61	135.017	up	Immunity_high vs Immunity_low
ARHGAP21	57584	-0.603	9.42853	-5.89302	1.02729e-08	1.09328e-07	8.92894	down	Immunity_high vs Immunity_low
ARHGAP25	9938	1.78259	7.40646	23.1334	2.01691e-68	3.04621e-65	145.229	up	Immunity_high vs Immunity_low
ARHGAP30	257106	1.41772	7.13587	19.1913	5.91228e-54	1.8799e-51	112.132	up	Immunity_high vs Immunity_low
ARHGAP32	9743	-0.67698	7.75567	-7.04631	1.2853e-11	2.08361e-10	15.463	down	Immunity_high vs Immunity_low
ARHGAP39	80728	-1.14422	8.39973	-8.94371	4.12399e-17	1.09594e-15	27.9191	down	Immunity_high vs Immunity_low
ARHGAP4	393	1.39273	7.79845	15.6522	1.09337e-40	1.16566e-38	81.7674	up	Immunity_high vs Immunity_low
ARHGAP45	23526	0.748644	6.15435	12.6792	9.70702e-30	5.54984e-28	56.7252	up	Immunity_high vs Immunity_low
ARHGAP9	64333	2.11169	8.05664	23.2358	8.65434e-69	1.56851e-65	146.069	up	Immunity_high vs Immunity_low
ARHGDIB	397	1.00627	12.2212	11.7158	2.5656e-26	1.17719e-24	48.9065	up	Immunity_high vs Immunity_low
ARHGEF19	128272	-0.717109	7.77372	-6.48377	3.72182e-10	5.01147e-09	12.1664	down	Immunity_high vs Immunity_low
ARHGEF3	50650	0.935907	9.26389	11.1862	1.77804e-24	7.47686e-23	44.7036	up	Immunity_high vs Immunity_low
ARHGEF37	389337	-0.595664	6.75416	-5.57638	5.52061e-08	5.18692e-07	7.29418	down	Immunity_high vs Immunity_low
ARHGEF5	7984	-0.626849	6.70116	-7.53773	5.8253e-13	1.08379e-11	18.5014	down	Immunity_high vs Immunity_low
ARHGEF6	9459	1.02723	8.99967	9.56393	4.558e-19	1.38374e-17	32.3712	up	Immunity_high vs Immunity_low
ARL9	132946	-0.75184	6.96391	-4.23858	3.00579e-05	0.000159057	1.22832	down	Immunity_high vs Immunity_low
ARRDC5	645432	0.719483	5.88437	9.13702	1.03045e-17	2.85565e-16	29.2889	up	Immunity_high vs Immunity_low
ART3	419	-1.11015	7.35603	-3.53607	0.000470949	0.00186323	-1.36989	down	Immunity_high vs Immunity_low
ASB16	92591	0.672468	5.68786	7.75561	1.41513e-13	2.83402e-12	19.8931	up	Immunity_high vs Immunity_low
ASPHD2	57168	0.721362	6.26327	11.1688	2.04048e-24	8.56055e-23	44.5672	up	Immunity_high vs Immunity_low
ASPM	259266	-0.713117	8.18446	-4.81413	2.35759e-06	1.59199e-05	3.66513	down	Immunity_high vs Immunity_low
ATAD2	29028	-0.689309	7.65449	-5.54116	6.62764e-08	6.15051e-07	7.1168	down	Immunity_high vs Immunity_low
ATL2	64225	-0.606858	8.07251	-5.17855	4.13035e-07	3.27322e-06	5.34472	down	Immunity_high vs Immunity_low
ATN1	1822	-0.637951	7.26086	-7.01269	1.58016e-11	2.53216e-10	15.2604	down	Immunity_high vs Immunity_low
ATP2A3	489	0.781997	6.25836	7.65837	2.66963e-13	5.19145e-12	19.2687	up	Immunity_high vs Immunity_low
ATP6V0E2	155066	-0.605029	9.60958	-4.12316	4.85426e-05	0.000243439	0.772503	down	Immunity_high vs Immunity_low
ATP6V1B1	525	-1.03049	8.09655	-4.40907	1.45253e-05	8.26812e-05	1.92192	down	Immunity_high vs Immunity_low
ATP8B2	57198	0.650421	6.44401	10.0708	1.02523e-20	3.41568e-19	36.1253	up	Immunity_high vs Immunity_low
ATP9A	10079	-0.789768	9.83834	-7.07822	1.05579e-11	1.72856e-10	15.6559	down	Immunity_high vs Immunity_low
AUNIP	79000	-0.667143	6.89289	-5.63487	4.0679e-08	3.89059e-07	7.59069	down	Immunity_high vs Immunity_low
AURKA	6790	-0.721213	8.19551	-5.35221	1.73996e-07	1.48052e-06	6.18111	down	Immunity_high vs Immunity_low
AURKB	9212	-0.609375	7.86998	-4.21372	3.33563e-05	0.000174776	1.1292	down	Immunity_high vs Immunity_low
AXL	558	0.635502	8.30021	6.69193	1.0958e-10	1.56626e-09	13.3627	up	Immunity_high vs Immunity_low
AZGP1	563	-1.40225	8.73416	-4.61745	5.79074e-06	3.58686e-05	2.80213	down	Immunity_high vs Immunity_low
B2M	567	0.888701	12.6482	7.94885	3.94964e-14	8.38835e-13	21.1493	up	Immunity_high vs Immunity_low
B4GALNT4	338707	-0.843021	6.22386	-8.26608	4.66142e-15	1.07077e-13	23.2545	down	Immunity_high vs Immunity_low
BAIAP2	10458	-0.626137	7.47906	-6.77516	6.6697e-11	9.85985e-10	13.8489	down	Immunity_high vs Immunity_low
BAIAP2L1	55971	-1.25168	8.45939	-10.7001	8.12678e-23	3.07494e-21	40.9157	down	Immunity_high vs Immunity_low
BAIAP2L2	80115	-0.728794	6.93546	-4.07467	5.91828e-05	0.000291475	0.584375	down	Immunity_high vs Immunity_low
BAMBI	25805	-0.998656	10.1145	-4.36279	1.77353e-05	9.90555e-05	1.73126	down	Immunity_high vs Immunity_low
BANK1	55024	1.62683	6.32103	12.3558	1.39733e-28	7.44862e-27	54.0783	up	Immunity_high vs Immunity_low
BARX2	8538	-0.608653	6.32114	-5.40654	1.32172e-07	1.15389e-06	6.44745	down	Immunity_high vs Immunity_low
BASP1	10409	1.34396	10.3091	10.5293	3.05963e-22	1.12252e-20	39.6025	up	Immunity_high vs Immunity_low
BATF	10538	1.20829	7.27653	10.7691	4.74297e-23	1.82122e-21	41.4493	up	Immunity_high vs Immunity_low
BATF3	55509	0.633322	6.5873	9.90003	3.72033e-20	1.20837e-18	34.8498	up	Immunity_high vs Immunity_low
BCAT1	586	0.666824	6.79107	5.66662	3.44306e-08	3.33344e-07	7.75269	up	Immunity_high vs Immunity_low
BCL11B	64919	1.34789	6.99839	10.2768	2.13446e-21	7.35457e-20	37.6788	up	Immunity_high vs Immunity_low
BEX2	84707	-0.585628	8.16041	-3.29351	0.00110907	0.00400415	-2.16705	down	Immunity_high vs Immunity_low
BHLHE22	27319	0.674014	6.38163	6.21279	1.75428e-09	2.12673e-08	10.6518	up	Immunity_high vs Immunity_low
BICDL2	146439	-0.605941	6.40081	-7.20953	4.67079e-12	7.92635e-11	16.4563	down	Immunity_high vs Immunity_low
BIN1	274	0.930663	8.35324	7.62909	3.22863e-13	6.19869e-12	19.0817	up	Immunity_high vs Immunity_low
BIRC5	332	-0.794342	8.05248	-4.67013	4.56513e-06	2.89295e-05	3.03026	down	Immunity_high vs Immunity_low
BLK	640	0.916225	5.74377	10.5246	3.17342e-22	1.16192e-20	39.5663	up	Immunity_high vs Immunity_low
BLVRA	644	0.597899	8.59139	5.72555	2.52177e-08	2.52233e-07	8.05531	up	Immunity_high vs Immunity_low
BNIP3	664	-0.91203	9.56565	-7.10291	9.06417e-12	1.49344e-10	15.8056	down	Immunity_high vs Immunity_low
BNIPL	149428	-1.30904	7.68363	-6.31197	1.0001e-09	1.26137e-08	11.2005	down	Immunity_high vs Immunity_low
BRF2	55290	-0.617061	7.69012	-6.41374	5.58137e-10	7.31959e-09	11.7703	down	Immunity_high vs Immunity_low
BRSK1	84446	0.632496	8.09303	5.54419	6.5245e-08	6.06722e-07	7.13203	up	Immunity_high vs Immunity_low
BST2	684	0.605708	8.45847	3.09449	0.00215927	0.00722308	-2.78173	up	Immunity_high vs Immunity_low
BTBD3	22903	-0.69485	7.33838	-6.68262	1.15803e-10	1.64872e-09	13.3087	down	Immunity_high vs Immunity_low
BTG2	7832	1.38823	8.21211	11.7213	2.45371e-26	1.13158e-24	48.9507	up	Immunity_high vs Immunity_low
BTK	695	0.828892	6.08012	13.2028	1.24201e-31	7.76214e-30	61.0526	up	Immunity_high vs Immunity_low
BTLA	151888	0.929058	5.90826	15.3298	1.7516e-39	1.73476e-37	79.0107	up	Immunity_high vs Immunity_low
BTN3A1	11119	1.11801	7.40363	13.3066	5.20968e-32	3.34823e-30	61.9153	up	Immunity_high vs Immunity_low
BTN3A2	11118	1.24533	7.65777	11.7416	2.08232e-26	9.65218e-25	49.1135	up	Immunity_high vs Immunity_low
BTN3A3	10384	1.10098	6.99373	14.7484	2.56288e-37	2.17054e-35	74.0563	up	Immunity_high vs Immunity_low
C11orf96	387763	0.739977	8.32692	5.52007	7.39075e-08	6.78571e-07	7.01107	up	Immunity_high vs Immunity_low
C15orf48	84419	1.09813	8.50548	6.85519	4.12151e-11	6.26137e-10	14.3205	up	Immunity_high vs Immunity_low
C19orf48	84798	-0.675437	9.27352	-6.45692	4.34898e-10	5.79992e-09	12.0142	down	Immunity_high vs Immunity_low
C1orf112	55732	-0.682087	7.47632	-6.69151	1.09852e-10	1.56892e-09	13.3603	down	Immunity_high vs Immunity_low
C1orf116	79098	-1.18415	7.90363	-6.02429	5.01406e-09	5.64791e-08	9.62759	down	Immunity_high vs Immunity_low
C1orf162	128346	1.79487	9.5098	21.5515	1.10294e-62	8.32907e-60	132.106	up	Immunity_high vs Immunity_low
C1orf198	84886	-0.763626	9.14382	-6.93632	2.52e-11	3.92712e-10	14.8027	down	Immunity_high vs Immunity_low
C1orf54	79630	1.28553	8.93582	15.8579	1.85753e-41	2.0528e-39	83.5291	up	Immunity_high vs Immunity_low
C1QA	712	1.74585	7.8463	17.8343	7.1067e-49	1.40002e-46	100.505	up	Immunity_high vs Immunity_low
C1QB	713	1.98254	11.031	16.8881	2.5373e-45	3.67889e-43	92.3737	up	Immunity_high vs Immunity_low
C1QC	714	1.73258	10.4652	15.5655	2.30554e-40	2.36077e-38	81.0259	up	Immunity_high vs Immunity_low
C1R	715	1.28497	7.59914	7.91693	4.88315e-14	1.02315e-12	20.9404	up	Immunity_high vs Immunity_low
C1S	716	1.40533	10.2841	10.3684	1.05763e-21	3.69333e-20	38.3741	up	Immunity_high vs Immunity_low
C2	717	1.44763	7.45901	15.636	1.25685e-40	1.33211e-38	81.6289	up	Immunity_high vs Immunity_low
C2CD4B	388125	0.707896	6.57228	3.79754	0.000177197	0.000776292	-0.452519	up	Immunity_high vs Immunity_low
C3	718	1.61673	8.4531	9.35713	2.08367e-18	6.04231e-17	30.8686	up	Immunity_high vs Immunity_low
C5orf46	389336	-0.878573	8.1115	-3.72429	0.000234329	0.000998349	-0.715525	down	Immunity_high vs Immunity_low
C7	730	0.750332	5.75008	7.2342	4.00266e-12	6.83734e-11	16.6078	up	Immunity_high vs Immunity_low
C8orf82	414919	-0.610481	7.65437	-6.88211	3.50221e-11	5.36098e-10	14.4801	down	Immunity_high vs Immunity_low
CA9	768	-1.07344	6.60536	-5.48808	8.71414e-08	7.85747e-07	6.85129	down	Immunity_high vs Immunity_low
CABYR	26256	-0.708636	7.16509	-5.35829	1.68744e-07	1.43853e-06	6.2108	down	Immunity_high vs Immunity_low
CACNB3	784	-0.889859	8.4779	-8.05448	1.94994e-14	4.22735e-13	21.8444	down	Immunity_high vs Immunity_low
CADM1	23705	-0.594364	7.83342	-4.09006	5.55874e-05	0.000275565	0.643845	down	Immunity_high vs Immunity_low
CADM4	199731	-0.757845	6.51319	-7.3569	1.84806e-12	3.29019e-11	17.3668	down	Immunity_high vs Immunity_low
CALB2	794	-0.729594	8.33451	-2.64513	0.00860026	0.0241175	-4.03662	down	Immunity_high vs Immunity_low
CALHM6	441168	0.641637	6.23011	8.1464	1.05014e-14	2.33817e-13	22.4541	up	Immunity_high vs Immunity_low
CALML5	51806	-1.42216	8.74692	-4.12147	4.88798e-05	0.000244926	0.76593	down	Immunity_high vs Immunity_low
CAMK1G	57172	1.57558	6.83183	9.24084	4.86043e-18	1.38073e-16	30.0315	up	Immunity_high vs Immunity_low
CAMSAP2	23271	-0.593104	7.81623	-7.14212	7.10827e-12	1.18519e-10	16.0441	down	Immunity_high vs Immunity_low
CAMSAP3	57662	-0.770033	6.2542	-8.87916	6.52879e-17	1.71241e-15	27.4654	down	Immunity_high vs Immunity_low
CANX	821	0.841023	7.66198	11.4642	1.93942e-25	8.59414e-24	46.9004	up	Immunity_high vs Immunity_low
CAP2	10486	-0.880474	7.98774	-6.6396	1.49392e-10	2.10707e-09	13.0594	down	Immunity_high vs Immunity_low
CAPS	828	-0.844244	7.76376	-4.56597	7.29038e-06	4.42798e-05	2.58141	down	Immunity_high vs Immunity_low
CASP1	834	1.44872	8.42385	16.3885	1.90421e-43	2.30079e-41	88.0816	up	Immunity_high vs Immunity_low
CASP4	837	1.25265	8.80171	14.8502	1.07292e-37	9.3041e-36	74.9215	up	Immunity_high vs Immunity_low
CASP4LP	643733	1.20921	6.93586	12.3653	1.29193e-28	6.92752e-27	54.1561	up	Immunity_high vs Immunity_low
CASZ1	54897	-0.656214	6.44223	-6.14764	2.52864e-09	2.99341e-08	10.2951	down	Immunity_high vs Immunity_low
CAV1	857	0.849438	8.71568	5.88807	1.05522e-08	1.12169e-07	8.90282	up	Immunity_high vs Immunity_low
CBLC	23624	-0.738418	6.57098	-6.17846	2.12778e-09	2.55052e-08	10.4635	down	Immunity_high vs Immunity_low
CBX2	84733	-0.98187	8.7462	-5.61904	4.41943e-08	4.20681e-07	7.51019	down	Immunity_high vs Immunity_low
CBX7	23492	0.598265	7.13564	6.27788	1.21408e-09	1.50919e-08	11.0111	up	Immunity_high vs Immunity_low
CCDC3	83643	0.61429	7.11076	5.24349	2.99713e-07	2.44464e-06	5.6548	up	Immunity_high vs Immunity_low
CCDC32	90416	0.678122	8.37755	10.0103	1.61978e-20	5.3571e-19	35.6726	up	Immunity_high vs Immunity_low
CCDC34	91057	-1.02664	9.7541	-7.2566	3.47832e-12	5.96416e-11	16.7457	down	Immunity_high vs Immunity_low
CCDC50	152137	0.662302	8.91589	7.73217	1.64984e-13	3.28589e-12	19.7421	up	Immunity_high vs Immunity_low
CCDC80	151887	0.694928	6.16631	6.92715	2.66453e-11	4.13459e-10	14.748	up	Immunity_high vs Immunity_low
CCDC85C	317762	-0.749712	7.84791	-7.22181	4.3255e-12	7.36799e-11	16.5317	down	Immunity_high vs Immunity_low
CCL13	6357	1.6399	6.85268	10.5775	2.10658e-22	7.80769e-21	39.9722	up	Immunity_high vs Immunity_low
CCL14	6358	1.4649	7.00867	8.0653	1.81332e-14	3.93588e-13	21.9159	up	Immunity_high vs Immunity_low
CCL18	6362	0.834346	5.89066	9.21285	5.95462e-18	1.68364e-16	29.8308	up	Immunity_high vs Immunity_low
CCL19	6363	2.95254	8.59614	10.8461	2.59728e-23	1.0145e-21	42.046	up	Immunity_high vs Immunity_low
CCL2	6347	1.46342	9.63355	10.4277	6.70009e-22	2.36711e-20	38.8262	up	Immunity_high vs Immunity_low
CCL21	6366	1.58768	7.02782	7.52381	6.37089e-13	1.17822e-11	18.4134	up	Immunity_high vs Immunity_low
CCL22	6367	0.944961	6.1793	8.2112	6.77101e-15	1.53397e-13	22.8865	up	Immunity_high vs Immunity_low
CCL3	6348	0.90654	7.29873	6.74106	8.17848e-11	1.19556e-09	13.6492	up	Immunity_high vs Immunity_low
CCL3L3	414062	1.27052	8.5204	9.72313	1.39846e-19	4.41564e-18	33.5397	up	Immunity_high vs Immunity_low
CCL4	6351	1.63622	7.86174	14.2446	1.8841e-35	1.42281e-33	69.7866	up	Immunity_high vs Immunity_low
CCL4L1	388372	0.833702	6.85184	6.91094	2.94044e-11	4.52311e-10	14.6515	up	Immunity_high vs Immunity_low
CCL5	6352	2.29006	10.726	13.5508	6.69076e-33	4.50793e-31	63.9535	up	Immunity_high vs Immunity_low
CCL8	6355	1.37076	9.26583	7.14478	6.99175e-12	1.16684e-10	16.0603	up	Immunity_high vs Immunity_low
CCN5	8839	1.13105	6.83111	6.5341	2.77612e-10	3.80306e-09	12.4531	up	Immunity_high vs Immunity_low
CCNB2	9133	-0.649683	8.91875	-4.3245	2.08941e-05	0.000114997	1.57487	down	Immunity_high vs Immunity_low
CCND2	894	1.53085	9.30325	11.2378	1.18062e-24	5.05853e-23	45.1096	up	Immunity_high vs Immunity_low
CCNDBP1	23582	0.913877	9.36466	8.44056	1.40881e-15	3.3685e-14	24.4343	up	Immunity_high vs Immunity_low
CCNE1	898	-0.825243	7.60972	-4.93963	1.30856e-06	9.28959e-06	4.23187	down	Immunity_high vs Immunity_low
CCR1	1230	0.692353	6.21359	11.9482	3.90633e-27	1.89301e-25	50.7735	up	Immunity_high vs Immunity_low
CCR2	729230	0.785205	5.84071	16.329	3.18331e-43	3.74638e-41	87.5708	up	Immunity_high vs Immunity_low
CCR6	1235	0.935896	6.01164	12.3054	2.11357e-28	1.11356e-26	53.6676	up	Immunity_high vs Immunity_low
CCR7	1236	2.08556	6.94431	14.3785	6.02705e-36	4.68816e-34	70.9189	up	Immunity_high vs Immunity_low
CD14	929	1.46722	9.74249	13.1108	2.68164e-31	1.64752e-29	60.2883	up	Immunity_high vs Immunity_low
CD163	9332	1.97043	8.96006	13.8974	3.58638e-34	2.549e-32	66.8598	up	Immunity_high vs Immunity_low
CD19	930	2.08029	6.67242	12.333	1.68539e-28	8.9316e-27	53.8923	up	Immunity_high vs Immunity_low
CD1B	910	0.945511	5.82312	10.3474	1.24299e-21	4.31571e-20	38.2142	up	Immunity_high vs Immunity_low
CD1C	911	1.09222	6.28038	11.7138	2.60695e-26	1.19314e-24	48.8906	up	Immunity_high vs Immunity_low
CD2	914	2.59826	8.42145	19.779	3.82777e-56	1.47605e-53	117.141	up	Immunity_high vs Immunity_low
CD24	100133941	-1.20345	13.2315	-6.37137	7.12133e-10	9.18627e-09	11.5322	down	Immunity_high vs Immunity_low
CD247	919	2.38115	8.18964	18.1469	4.7785e-50	1.01889e-47	103.188	up	Immunity_high vs Immunity_low
CD248	57124	0.978735	8.60239	6.33587	8.72639e-10	1.11143e-08	11.3336	up	Immunity_high vs Immunity_low
CD27	939	1.70977	6.88981	15.5197	3.42043e-40	3.46323e-38	80.6339	up	Immunity_high vs Immunity_low
CD300A	11314	0.951032	6.97577	10.701	8.06448e-23	3.05775e-21	40.9234	up	Immunity_high vs Immunity_low
CD33	945	1.14467	6.58775	15.0168	2.57344e-38	2.37964e-36	76.3402	up	Immunity_high vs Immunity_low
CD34	947	0.765975	8.64381	6.53194	2.81146e-10	3.84566e-09	12.4407	up	Immunity_high vs Immunity_low
CD36	948	1.08798	7.65869	4.72029	3.63298e-06	2.36085e-05	3.24953	up	Immunity_high vs Immunity_low
CD37	951	2.29778	7.30101	21.6818	3.68111e-63	2.90072e-60	133.196	up	Immunity_high vs Immunity_low
CD38	952	1.8439	6.77331	13.0494	4.47513e-31	2.71262e-29	59.7799	up	Immunity_high vs Immunity_low
CD3D	915	2.7457	8.5549	19.7683	4.19499e-56	1.57031e-53	117.05	up	Immunity_high vs Immunity_low
CD3E	916	1.15965	6.21149	13.6315	3.39062e-33	2.31893e-31	64.6285	up	Immunity_high vs Immunity_low
CD3G	917	1.4591	6.39514	17.5648	7.29742e-48	1.30949e-45	98.19	up	Immunity_high vs Immunity_low
CD4	920	1.24751	6.71071	20.2891	4.90178e-58	2.27794e-55	121.472	up	Immunity_high vs Immunity_low
CD40	958	1.16492	6.72105	17.0974	4.15287e-46	6.60233e-44	94.1727	up	Immunity_high vs Immunity_low
CD40LG	959	0.601057	5.63015	12.4464	6.634e-29	3.64347e-27	54.8176	up	Immunity_high vs Immunity_low
CD44	960	0.657893	8.20603	5.67798	3.24304e-08	3.16345e-07	7.81083	up	Immunity_high vs Immunity_low
CD48	962	2.31149	7.59386	19.8459	2.15968e-56	8.69821e-54	117.71	up	Immunity_high vs Immunity_low
CD5	921	1.14703	6.08035	16.9171	1.97373e-45	2.90829e-43	92.6234	up	Immunity_high vs Immunity_low
CD52	1043	2.93518	9.13642	17.1708	2.20236e-46	3.56389e-44	94.8032	up	Immunity_high vs Immunity_low
CD53	963	1.758	7.12876	25.9035	3.42559e-78	6.20854e-74	167.559	up	Immunity_high vs Immunity_low
CD6	923	1.99003	7.79976	16.6665	1.72393e-44	2.29739e-42	90.4691	up	Immunity_high vs Immunity_low
CD68	968	1.25164	6.82504	10.046	1.23628e-20	4.10374e-19	35.94	up	Immunity_high vs Immunity_low
CD69	969	1.9111	6.97409	17.8197	8.06375e-49	1.54431e-46	100.38	up	Immunity_high vs Immunity_low
CD7	924	1.72165	7.06442	15.3806	1.13137e-39	1.13287e-37	79.4451	up	Immunity_high vs Immunity_low
CD72	971	1.03999	6.6122	14.1462	4.3499e-35	3.17893e-33	68.9554	up	Immunity_high vs Immunity_low
CD74	972	1.90296	8.2639	17.8192	8.09478e-49	1.54431e-46	100.376	up	Immunity_high vs Immunity_low
CD79A	973	2.6137	7.83124	11.9831	2.94156e-27	1.437e-25	51.055	up	Immunity_high vs Immunity_low
CD79B	974	2.01157	7.96038	12.0177	2.21947e-27	1.09013e-25	51.3344	up	Immunity_high vs Immunity_low
CD83	9308	1.09123	8.35305	12.2615	3.02836e-28	1.57718e-26	53.3108	up	Immunity_high vs Immunity_low
CD84	8832	1.38291	6.82835	18.7541	2.54187e-52	6.77483e-50	108.393	up	Immunity_high vs Immunity_low
CD86	942	1.55411	8.22421	18.402	5.28597e-51	1.22824e-48	105.377	up	Immunity_high vs Immunity_low
CD8A	925	2.28528	7.79099	17.0383	6.92131e-46	1.07215e-43	93.665	up	Immunity_high vs Immunity_low
CD93	22918	0.849303	9.01822	7.09595	9.46243e-12	1.55482e-10	15.7634	up	Immunity_high vs Immunity_low
CDC20	991	-0.994817	10.1074	-5.38279	1.4909e-07	1.28611e-06	6.33074	down	Immunity_high vs Immunity_low
CDC42SE2	56990	0.928755	7.91408	10.791	3.99575e-23	1.54741e-21	41.6191	up	Immunity_high vs Immunity_low
CDC45	8318	-0.70298	8.03373	-5.34158	1.83573e-07	1.55835e-06	6.12923	down	Immunity_high vs Immunity_low
CDCA3	83461	-0.836883	7.43714	-5.75768	2.12588e-08	2.14529e-07	8.22135	down	Immunity_high vs Immunity_low
CDCA5	113130	-0.692985	9.29244	-4.82179	2.27518e-06	1.54382e-05	3.69935	down	Immunity_high vs Immunity_low
CDCA8	55143	-0.713286	7.56946	-5.50184	8.11899e-08	7.3944e-07	6.9199	down	Immunity_high vs Immunity_low
CDH1	999	-0.729153	9.35512	-3.96732	9.11755e-05	0.000428544	0.174902	down	Immunity_high vs Immunity_low
CDH11	1009	0.775782	8.48638	5.06301	7.25205e-07	5.44249e-06	4.80104	up	Immunity_high vs Immunity_low
CDH3	1001	-0.777358	8.8237	-3.52635	0.000487845	0.00192336	-1.40283	down	Immunity_high vs Immunity_low
CDH5	1003	0.727893	7.47253	6.97226	2.02392e-11	3.19804e-10	15.0177	up	Immunity_high vs Immunity_low
CDK1	983	-0.594394	7.86268	-4.31696	2.1577e-05	0.000118288	1.5442	down	Immunity_high vs Immunity_low
CDK12	51755	1.29205	7.73474	8.91716	4.983e-17	1.3165e-15	27.7322	up	Immunity_high vs Immunity_low
CDK14	5218	-0.693546	7.53295	-8.30651	3.53732e-15	8.19825e-14	23.5265	down	Immunity_high vs Immunity_low
CDKN2A	1029	-0.691081	7.21162	-3.35901	0.000884286	0.00325814	-1.95695	down	Immunity_high vs Immunity_low
CDR2L	30850	-0.595925	9.1086	-4.69747	4.03181e-06	2.58664e-05	3.1495	down	Immunity_high vs Immunity_low
CDS1	1040	-1.0498	8.09895	-8.8493	8.07036e-17	2.1076e-15	27.2561	down	Immunity_high vs Immunity_low
CEL	1056	-0.68033	6.53726	-3.80281	0.000173642	0.000762191	-0.433423	down	Immunity_high vs Immunity_low
CELF2	10659	1.15332	6.3111	14.3937	5.29726e-36	4.15617e-34	71.0472	up	Immunity_high vs Immunity_low
CELSR2	1952	-1.09883	6.60164	-10.7195	6.98457e-23	2.66502e-21	41.0658	down	Immunity_high vs Immunity_low
CEMIP	57214	0.67098	7.16188	3.86943	0.000134121	0.000606337	-0.18987	up	Immunity_high vs Immunity_low
CENPA	1058	-0.663225	7.59515	-4.9422	1.29275e-06	9.20622e-06	4.24358	down	Immunity_high vs Immunity_low
CENPF	1063	-0.928817	7.83875	-6.29116	1.12591e-09	1.40828e-08	11.0847	down	Immunity_high vs Immunity_low
CENPV	201161	-0.690903	7.86167	-4.0878	5.61007e-05	0.00027773	0.635123	down	Immunity_high vs Immunity_low
CENPW	387103	-0.712949	8.07786	-4.08917	5.57878e-05	0.000276332	0.64043	down	Immunity_high vs Immunity_low
CEP70	80321	-0.711222	6.8077	-7.7636	1.34293e-13	2.70736e-12	19.9446	down	Immunity_high vs Immunity_low
CETP	1071	0.940063	6.47774	10.1221	6.94487e-21	2.31802e-19	36.5109	up	Immunity_high vs Immunity_low
CFB	629	1.11712	9.13438	4.54388	8.04291e-06	4.84606e-05	2.48732	up	Immunity_high vs Immunity_low
CFD	1675	1.6041	8.70223	8.46339	1.20326e-15	2.90384e-14	24.5898	up	Immunity_high vs Immunity_low
CFH	3075	1.22175	7.01139	10.6382	1.31542e-22	4.92574e-21	40.4387	up	Immunity_high vs Immunity_low
CGN	57530	-1.43231	8.32056	-8.85438	7.78468e-17	2.03592e-15	27.2917	down	Immunity_high vs Immunity_low
CH25H	9023	1.03525	6.48427	8.57288	5.62972e-16	1.38256e-14	25.339	up	Immunity_high vs Immunity_low
CHAF1B	8208	-0.740832	7.28587	-6.54069	2.67134e-10	3.67061e-09	12.4907	down	Immunity_high vs Immunity_low
CHD7	55636	-0.615147	7.45883	-5.96313	7.01392e-09	7.68563e-08	9.30055	down	Immunity_high vs Immunity_low
CHKA	1119	-0.786402	8.6019	-6.92505	2.69878e-11	4.17344e-10	14.7355	down	Immunity_high vs Immunity_low
CHKB	1120	0.588008	8.24232	7.51717	6.64832e-13	1.22453e-11	18.3715	up	Immunity_high vs Immunity_low
CHN1	1123	0.89666	8.15786	7.5783	4.48476e-13	8.44926e-12	18.7585	up	Immunity_high vs Immunity_low
CHN2	1124	0.585144	5.96791	7.77617	1.23661e-13	2.50924e-12	20.0258	up	Immunity_high vs Immunity_low
CHRM3	1131	-0.760229	6.25189	-5.09026	6.35594e-07	4.83403e-06	4.92835	down	Immunity_high vs Immunity_low
CHST15	51363	0.702205	8.37618	6.48121	3.77776e-10	5.07923e-09	12.1518	up	Immunity_high vs Immunity_low
CHST3	9469	-0.813954	7.80302	-6.04862	4.38433e-09	4.9788e-08	9.7584	down	Immunity_high vs Immunity_low
CHST7	56548	0.834429	7.24672	12.0696	1.45348e-27	7.33783e-26	51.7544	up	Immunity_high vs Immunity_low
CIART	148523	-0.723973	6.59146	-6.44099	4.76915e-10	6.32305e-09	11.924	down	Immunity_high vs Immunity_low
CIDEC	63924	1.10328	6.43026	5.33396	1.90741e-07	1.6139e-06	6.09214	up	Immunity_high vs Immunity_low
CILP	8483	1.17565	8.52847	5.21574	3.43854e-07	2.78091e-06	5.52193	up	Immunity_high vs Immunity_low
CITED4	163732	-1.17594	8.88515	-6.40777	5.7767e-10	7.56467e-09	11.7367	down	Immunity_high vs Immunity_low
CKB	1152	-0.89664	7.31221	-4.45296	1.2001e-05	6.93357e-05	2.10437	down	Immunity_high vs Immunity_low
CKMT1B	1159	-0.612347	8.12791	-2.41058	0.0165343	0.0424716	-4.61718	down	Immunity_high vs Immunity_low
CKS1B	1163	-0.696403	10.5174	-4.09455	5.4577e-05	0.000271001	0.661257	down	Immunity_high vs Immunity_low
CLDN1	9076	-0.961215	7.97541	-3.69186	0.000264828	0.00111157	-0.830499	down	Immunity_high vs Immunity_low
CLDN3	1365	-0.754571	8.22408	-3.58925	0.000387795	0.00156291	-1.18816	down	Immunity_high vs Immunity_low
CLDN5	7122	0.964866	6.89835	7.2639	3.32235e-12	5.7021e-11	16.7907	up	Immunity_high vs Immunity_low
CLDN7	1366	-0.780823	8.54633	-4.53177	8.48644e-06	5.08561e-05	2.43592	down	Immunity_high vs Immunity_low
CLDN8	9073	-0.86329	7.51858	-3.13615	0.00188329	0.00639669	-2.656	down	Immunity_high vs Immunity_low
CLEC10A	10462	0.615805	5.65576	14.0825	7.4664e-35	5.43458e-33	68.4187	up	Immunity_high vs Immunity_low
CLEC12A	160364	0.836392	5.81846	14.5831	1.05219e-36	8.62889e-35	72.653	up	Immunity_high vs Immunity_low
CLEC14A	161198	0.730055	7.22213	7.31564	2.39883e-12	4.19656e-11	17.1106	up	Immunity_high vs Immunity_low
CLEC1A	51267	0.673692	6.28153	10.2657	2.32365e-21	7.99123e-20	37.5947	up	Immunity_high vs Immunity_low
CLEC3B	7123	0.708637	6.15777	6.84437	4.39964e-11	6.65602e-10	14.2565	up	Immunity_high vs Immunity_low
CLEC4A	50856	1.15587	6.603	16.4784	8.75718e-44	1.09459e-41	88.8537	up	Immunity_high vs Immunity_low
CLECL1	160365	1.32771	6.34248	15.8926	1.3763e-41	1.53031e-39	83.8271	up	Immunity_high vs Immunity_low
CLIC6	54102	0.767257	6.91901	4.74335	3.2688e-06	2.14108e-05	3.351	up	Immunity_high vs Immunity_low
CLPSL1	340204	-0.731935	6.5376	-3.96398	9.23954e-05	0.000433603	0.162326	down	Immunity_high vs Immunity_low
CLPSL2	389383	-0.642604	6.68172	-3.50548	0.000526073	0.00205663	-1.47329	down	Immunity_high vs Immunity_low
CLUH	23277	-0.588093	7.67919	-6.61078	1.77066e-10	2.46668e-09	12.8931	down	Immunity_high vs Immunity_low
CMAHP	8418	0.626209	6.8083	5.71019	2.73558e-08	2.71372e-07	7.9762	up	Immunity_high vs Immunity_low
CMKLR1	1240	0.813861	5.99575	17.9311	3.08004e-49	6.20252e-47	101.336	up	Immunity_high vs Immunity_low
CMTM1	113540	0.667869	9.489	6.70209	1.03159e-10	1.48144e-09	13.4219	up	Immunity_high vs Immunity_low
CMTM3	123920	0.645333	9.53279	5.90911	9.41449e-09	1.00725e-07	9.01389	up	Immunity_high vs Immunity_low
CMTM4	146223	-0.932647	8.51769	-8.36027	2.44788e-15	5.75427e-14	23.8895	down	Immunity_high vs Immunity_low
CMTM8	152189	-0.593351	8.81103	-5.2726	2.59325e-07	2.14221e-06	5.79483	down	Immunity_high vs Immunity_low
CNFN	84518	-0.739606	7.52015	-5.4492	1.06355e-07	9.4212e-07	6.65808	down	Immunity_high vs Immunity_low
CNIH2	254263	-0.722822	6.50168	-6.30507	1.04024e-09	1.30653e-08	11.162	down	Immunity_high vs Immunity_low
CNKSR3	154043	-0.673665	7.8446	-5.18433	4.01457e-07	3.18704e-06	5.3722	down	Immunity_high vs Immunity_low
CNRIP1	25927	0.604557	6.08508	8.16334	9.36477e-15	2.0954e-13	22.5669	up	Immunity_high vs Immunity_low
COBL	23242	-1.35395	7.99527	-7.29188	2.78639e-12	4.8465e-11	16.9635	down	Immunity_high vs Immunity_low
COL15A1	1306	0.830877	8.64576	6.07344	3.8217e-09	4.39473e-08	9.89229	up	Immunity_high vs Immunity_low
COL1A2	1278	0.609258	11.9563	3.12819	0.00193338	0.00653986	-2.68016	up	Immunity_high vs Immunity_low
COL2A1	1280	-0.845932	6.0911	-4.03554	6.93538e-05	0.000335639	0.433988	down	Immunity_high vs Immunity_low
COL3A1	1281	0.632601	11.8346	3.5708	0.00041494	0.00166013	-1.25149	up	Immunity_high vs Immunity_low
COL4A5	1287	-0.761487	7.60298	-4.51989	8.9441e-06	5.32238e-05	2.38563	down	Immunity_high vs Immunity_low
COL6A3	1293	1.05683	10.4053	5.98765	6.13264e-09	6.76522e-08	9.43136	up	Immunity_high vs Immunity_low
COL9A2	1298	-0.654026	7.51852	-3.91126	0.000113834	0.000524434	-0.0349802	down	Immunity_high vs Immunity_low
COLEC12	81035	1.02941	7.61205	6.16911	2.2424e-09	2.68082e-08	10.4123	up	Immunity_high vs Immunity_low
CORO1A	11151	1.89563	8.08049	18.2493	1.97433e-50	4.36374e-48	104.067	up	Immunity_high vs Immunity_low
COX7A1	1346	0.718028	8.19493	4.94236	1.29177e-06	9.20622e-06	4.24431	up	Immunity_high vs Immunity_low
CPA3	1359	1.1373	6.55459	6.4001	6.03768e-10	7.88947e-09	11.6935	up	Immunity_high vs Immunity_low
CPED1	79974	0.978697	6.90655	10.9478	1.16852e-23	4.71675e-22	42.8375	up	Immunity_high vs Immunity_low
CPVL	54504	1.73457	8.87014	13.7049	1.82467e-33	1.26223e-31	65.2439	up	Immunity_high vs Immunity_low
CPXM1	56265	0.76527	6.83001	5.88603	1.06694e-08	1.13215e-07	8.89207	up	Immunity_high vs Immunity_low
CPXM2	119587	0.585037	7.81104	3.82774	0.00015771	0.00070104	-0.342716	up	Immunity_high vs Immunity_low
CPZ	8532	0.742509	6.33816	7.26827	3.23247e-12	5.56894e-11	16.8177	up	Immunity_high vs Immunity_low
CR2	1380	1.01023	5.89626	8.36847	2.31395e-15	5.46069e-14	23.9449	up	Immunity_high vs Immunity_low
CRACR2B	283229	-0.796365	9.25039	-4.41563	1.4118e-05	8.05144e-05	1.94909	down	Immunity_high vs Immunity_low
CRB3	92359	-0.95956	8.13516	-7.33294	2.15057e-12	3.79153e-11	17.2179	down	Immunity_high vs Immunity_low
CREBRF	153222	0.602383	7.28511	8.47862	1.08302e-15	2.63118e-14	24.6936	up	Immunity_high vs Immunity_low
CRIP1	1396	0.838148	10.7152	4.31832	2.14521e-05	0.00011764	1.54973	up	Immunity_high vs Immunity_low
CRISPLD2	83716	0.883361	9.30259	5.90434	9.66118e-09	1.03218e-07	8.98871	up	Immunity_high vs Immunity_low
CRLF3	51379	0.701697	7.35906	11.1904	1.71943e-24	7.24721e-23	44.7369	up	Immunity_high vs Immunity_low
CRTAP	10491	0.678782	7.91055	4.67547	4.45598e-06	2.83468e-05	3.05348	up	Immunity_high vs Immunity_low
CRYAB	1410	-1.23429	10.2078	-4.44954	1.21813e-05	7.0288e-05	2.09011	down	Immunity_high vs Immunity_low
CSF1R	1436	1.53039	10.2054	16.9407	1.60984e-45	2.41131e-43	92.8259	up	Immunity_high vs Immunity_low
CSF2RA	1438	1.33911	6.95644	18.5683	1.26005e-51	3.08611e-49	106.802	up	Immunity_high vs Immunity_low
CSF3R	1441	0.864574	7.1799	7.01048	1.60171e-11	2.56444e-10	15.2471	up	Immunity_high vs Immunity_low
CST3	1471	1.15894	11.6699	9.86693	4.77035e-20	1.5384e-18	34.6038	up	Immunity_high vs Immunity_low
CST7	8530	1.71052	6.99229	20.3432	3.09128e-58	1.47438e-55	121.93	up	Immunity_high vs Immunity_low
CSTF3	1479	-0.633273	8.61384	-5.08874	6.40302e-07	4.8678e-06	4.92123	down	Immunity_high vs Immunity_low
CTHRC1	115908	0.596402	8.10439	3.18774	0.00158679	0.00551571	-2.49817	up	Immunity_high vs Immunity_low
CTLA4	1493	1.20583	6.65405	13.0666	3.87842e-31	2.36675e-29	59.9219	up	Immunity_high vs Immunity_low
CTSB	1508	0.939282	10.1037	7.74709	1.4964e-13	2.99017e-12	19.8381	up	Immunity_high vs Immunity_low
CTSC	1075	1.6144	9.22551	13.522	8.52935e-33	5.7254e-31	63.7123	up	Immunity_high vs Immunity_low
CTSG	1511	1.201	6.57217	6.45173	4.48188e-10	5.96996e-09	11.9847	up	Immunity_high vs Immunity_low
CTSH	1512	1.30507	10.9835	14.1833	3.17356e-35	2.34766e-33	69.2686	up	Immunity_high vs Immunity_low
CTSK	1513	1.37447	9.89172	7.8022	1.04225e-13	2.13443e-12	20.1941	up	Immunity_high vs Immunity_low
CTSL	1514	0.89808	10.6752	8.0508	1.9986e-14	4.32251e-13	21.8201	up	Immunity_high vs Immunity_low
CTSO	1519	0.878102	7.7091	8.10068	1.42937e-14	3.13251e-13	22.1503	up	Immunity_high vs Immunity_low
CTSV	1515	-1.05752	7.36286	-6.31392	9.89094e-10	1.24835e-08	11.2113	down	Immunity_high vs Immunity_low
CTSW	1521	1.07692	6.14105	15.1494	8.24821e-39	7.86792e-37	77.4709	up	Immunity_high vs Immunity_low
CTSZ	1522	0.812064	8.56815	9.13875	1.0176e-17	2.82434e-16	29.3013	up	Immunity_high vs Immunity_low
CXADR	1525	-1.30226	8.46198	-7.4928	7.77362e-13	1.426e-11	18.2178	down	Immunity_high vs Immunity_low
CXCL10	3627	1.55543	10.217	6.87584	3.6377e-11	5.55899e-10	14.4429	up	Immunity_high vs Immunity_low
CXCL11	6373	0.870601	6.35232	5.3997	1.36846e-07	1.19183e-06	6.41377	up	Immunity_high vs Immunity_low
CXCL12	6387	1.93768	9.05175	11.3047	6.92832e-25	3.00404e-23	45.638	up	Immunity_high vs Immunity_low
CXCL13	10563	2.18484	7.28369	12.0494	1.71431e-27	8.55925e-26	51.5906	up	Immunity_high vs Immunity_low
CXCL14	9547	0.852997	7.5907	4.47537	1.08802e-05	6.35285e-05	2.19813	up	Immunity_high vs Immunity_low
CXCL9	4283	2.76207	9.4994	12.369	1.25406e-28	6.74439e-27	54.1857	up	Immunity_high vs Immunity_low
CXCR3	2833	1.59944	6.45595	18.6494	6.26329e-52	1.58619e-49	107.497	up	Immunity_high vs Immunity_low
CXCR4	7852	1.27703	8.89901	6.80354	5.62561e-11	8.39165e-10	14.0157	up	Immunity_high vs Immunity_low
CXCR5	643	1.61938	6.07777	12.8723	1.95653e-30	1.1513e-28	58.3152	up	Immunity_high vs Immunity_low
CXCR6	10663	1.24723	6.25138	16.3637	2.36005e-43	2.83268e-41	87.8683	up	Immunity_high vs Immunity_low
CYB5R2	51700	-0.833461	8.21145	-5.19121	3.88081e-07	3.09033e-06	5.40495	down	Immunity_high vs Immunity_low
CYBA	1535	1.31993	11.0451	12.2411	3.58066e-28	1.85417e-26	53.1445	up	Immunity_high vs Immunity_low
CYBB	1536	1.84534	7.57141	21.4609	2.36671e-62	1.71577e-59	131.347	up	Immunity_high vs Immunity_low
CYBC1	79415	0.611106	8.60543	8.04031	2.14431e-14	4.62111e-13	21.7508	up	Immunity_high vs Immunity_low
CYFIP2	26999	1.0791	8.59696	7.34026	2.05332e-12	3.62713e-11	17.2633	up	Immunity_high vs Immunity_low
CYGB	114757	0.655358	7.6874	5.68432	3.13651e-08	3.06945e-07	7.84329	up	Immunity_high vs Immunity_low
CYP1B1	1545	0.93949	8.65691	4.43306	1.30883e-05	7.50912e-05	2.02146	up	Immunity_high vs Immunity_low
CYP2J2	1573	-0.717411	7.89048	-3.67592	0.000281142	0.00117352	-0.886633	down	Immunity_high vs Immunity_low
CYSLTR1	10800	1.05583	6.36987	15.9314	9.84983e-42	1.10196e-39	84.1596	up	Immunity_high vs Immunity_low
CYTH1	9267	0.69172	9.63903	8.46768	1.16809e-15	2.82273e-14	24.619	up	Immunity_high vs Immunity_low
CYTIP	9595	1.23386	6.59608	17.3028	7.03156e-47	1.18e-44	95.9381	up	Immunity_high vs Immunity_low
DAB2	1601	0.996995	9.66341	8.49699	9.53692e-16	2.3201e-14	24.8191	up	Immunity_high vs Immunity_low
DBN1	1627	-0.624966	8.99855	-5.72468	2.53346e-08	2.53262e-07	8.05082	down	Immunity_high vs Immunity_low
DBNDD1	79007	-1.05118	8.54654	-6.74153	8.15567e-11	1.19397e-09	13.6519	down	Immunity_high vs Immunity_low
DCAF6	55827	-0.596219	9.32439	-7.55099	5.34869e-13	1.00144e-11	18.5853	down	Immunity_high vs Immunity_low
DCANP1	140947	1.22784	6.2919	16.3374	2.96236e-43	3.53222e-41	87.6423	up	Immunity_high vs Immunity_low
DCN	1634	1.7392	8.21748	8.46784	1.16684e-15	2.82273e-14	24.6201	up	Immunity_high vs Immunity_low
DCSTAMP	81501	0.747839	5.85711	7.18509	5.44067e-12	9.17271e-11	16.3065	up	Immunity_high vs Immunity_low
DDIT4	54541	-0.980706	10.0433	-6.36827	7.24912e-10	9.32456e-09	11.5148	down	Immunity_high vs Immunity_low
DDR1	780	-1.07976	8.80413	-9.02523	2.30241e-17	6.20044e-16	28.4947	down	Immunity_high vs Immunity_low
DDX60	55601	0.745966	6.90181	7.57385	4.61557e-13	8.67765e-12	18.7302	up	Immunity_high vs Immunity_low
DECR2	26063	-0.620749	8.1795	-6.1494	2.50393e-09	2.96804e-08	10.3046	down	Immunity_high vs Immunity_low
DEF6	50619	0.93166	7.23683	11.5621	8.84448e-26	3.96776e-24	47.6791	up	Immunity_high vs Immunity_low
DENND1C	79958	0.661544	5.77123	14.4953	2.22667e-36	1.79361e-34	71.9082	up	Immunity_high vs Immunity_low
DENND2D	79961	1.12619	8.44353	10.937	1.27216e-23	5.10103e-22	42.7532	up	Immunity_high vs Immunity_low
DENND5B	160518	0.618449	6.13597	7.97777	3.25745e-14	6.94565e-13	21.339	up	Immunity_high vs Immunity_low
DGKA	1606	0.94788	6.82994	10.2297	3.05846e-21	1.04391e-19	37.3227	up	Immunity_high vs Immunity_low
DHCR24	1718	-0.591239	7.88746	-3.49411	0.000548064	0.0021357	-1.51152	down	Immunity_high vs Immunity_low
DHRS11	79154	-0.609106	7.8633	-5.28191	2.47556e-07	2.05341e-06	5.83977	down	Immunity_high vs Immunity_low
DHRS9	10170	1.99393	6.78291	13.8176	7.04285e-34	4.96672e-32	66.1895	up	Immunity_high vs Immunity_low
DHTKD1	55526	-0.627275	7.11029	-6.41878	5.42171e-10	7.11536e-09	11.7987	down	Immunity_high vs Immunity_low
DHX58	79132	0.6374	7.30732	7.08212	1.03066e-11	1.68894e-10	15.6796	up	Immunity_high vs Immunity_low
DLX5	1749	-0.813024	6.4774	-4.3268	2.06903e-05	0.00011391	1.58422	down	Immunity_high vs Immunity_low
DMKN	93099	-0.887108	7.32208	-4.14756	4.39029e-05	0.000222262	0.867944	down	Immunity_high vs Immunity_low
DNAJB1	3337	-0.585911	8.6751	-7.26501	3.2994e-12	5.67346e-11	16.7975	down	Immunity_high vs Immunity_low
DNASE1L3	1776	1.12356	5.94991	10.8668	2.20845e-23	8.72027e-22	42.2066	up	Immunity_high vs Immunity_low
DOCK10	55619	1.6268	7.95118	23.5285	7.73959e-70	2.00389e-66	148.467	up	Immunity_high vs Immunity_low
DOCK11	139818	1.45019	7.41605	18.9929	3.25628e-53	9.51886e-51	110.436	up	Immunity_high vs Immunity_low
DOCK2	1794	2.07161	8.59114	24.3989	6.23258e-73	1.88266e-69	155.54	up	Immunity_high vs Immunity_low
DOCK8	81704	1.45523	7.16232	18.4136	4.7839e-51	1.12602e-48	105.476	up	Immunity_high vs Immunity_low
DOK2	9046	0.833742	6.00406	16.4336	1.28936e-43	1.58969e-41	88.4692	up	Immunity_high vs Immunity_low
DPCD	25911	-0.685956	7.69379	-7.64455	2.92045e-13	5.65493e-12	19.1803	down	Immunity_high vs Immunity_low
DPEP2	64174	1.25654	6.45109	15.5314	3.09409e-40	3.15041e-38	80.7336	up	Immunity_high vs Immunity_low
DPT	1805	1.39348	7.3388	9.20797	6.16907e-18	1.74156e-16	29.7958	up	Immunity_high vs Immunity_low
DPYD	1806	0.930582	6.32828	13.3483	3.67095e-32	2.38467e-30	62.2629	up	Immunity_high vs Immunity_low
DRAM1	55332	0.956956	8.30486	10.5077	3.61372e-22	1.30728e-20	39.4376	up	Immunity_high vs Immunity_low
DSC2	1824	-0.897241	7.30083	-5.89441	1.01959e-08	1.08637e-07	8.93626	down	Immunity_high vs Immunity_low
DSE	29940	0.91233	8.71792	8.92048	4.8665e-17	1.28948e-15	27.7556	up	Immunity_high vs Immunity_low
DSG2	1829	-0.939485	7.20047	-7.85515	7.3514e-14	1.51923e-12	20.5376	down	Immunity_high vs Immunity_low
DSG3	1830	-0.890358	6.42868	-3.75292	0.000210191	0.000904653	-0.613281	down	Immunity_high vs Immunity_low
DSP	1832	-1.35035	9.09145	-8.1317	1.15972e-14	2.57584e-13	22.3563	down	Immunity_high vs Immunity_low
DTNA	1837	-0.63469	7.18001	-4.29585	2.3603e-05	0.00012854	1.45863	down	Immunity_high vs Immunity_low
DTNB	1838	-0.626523	6.83894	-6.06564	3.99037e-09	4.56575e-08	9.85018	down	Immunity_high vs Immunity_low
DUSP1	1843	1.133	9.70218	5.70977	2.74172e-08	2.71683e-07	7.97403	up	Immunity_high vs Immunity_low
DUSP5	1847	1.02591	7.96556	9.18921	7.06649e-18	1.97949e-16	29.6616	up	Immunity_high vs Immunity_low
DYNC2I2	89891	-0.716948	8.04509	-7.10512	8.94068e-12	1.47444e-10	15.819	down	Immunity_high vs Immunity_low
EAF2	55840	1.02012	6.82436	9.61956	3.01974e-19	9.2293e-18	32.7783	up	Immunity_high vs Immunity_low
EBF1	1879	0.926338	6.99675	9.2606	4.21056e-18	1.19988e-16	30.1733	up	Immunity_high vs Immunity_low
EBF3	253738	0.601393	6.16919	7.22757	4.17247e-12	7.1207e-11	16.567	up	Immunity_high vs Immunity_low
ECHDC3	79746	-0.664581	8.50663	-4.67837	4.39765e-06	2.80151e-05	3.06613	down	Immunity_high vs Immunity_low
ECM2	1842	0.9115	7.40434	6.52774	2.88116e-10	3.92914e-09	12.4168	up	Immunity_high vs Immunity_low
ECT2	1894	-0.612071	8.0605	-4.98841	1.03766e-06	7.55585e-06	4.45544	down	Immunity_high vs Immunity_low
EDN2	1907	-0.632591	6.22346	-4.79802	2.54049e-06	1.70092e-05	3.59328	down	Immunity_high vs Immunity_low
EFEMP1	2202	1.07676	8.53698	5.06221	7.28036e-07	5.46147e-06	4.79728	up	Immunity_high vs Immunity_low
EFHD1	80303	-1.15688	10.7375	-4.90303	1.55558e-06	1.09119e-05	4.06529	down	Immunity_high vs Immunity_low
EFHD2	79180	0.920739	9.30462	11.8851	6.5199e-27	3.08529e-25	50.2654	up	Immunity_high vs Immunity_low
EFNA1	1942	-1.26378	10.4504	-9.43544	1.1742e-18	3.46036e-17	31.4355	down	Immunity_high vs Immunity_low
EFNA4	1945	-0.708767	7.03129	-9.67703	1.97091e-19	6.0957e-18	33.2003	down	Immunity_high vs Immunity_low
EFS	10278	-0.764968	7.83701	-6.953	2.27643e-11	3.56595e-10	14.9024	down	Immunity_high vs Immunity_low
EGFL6	25975	1.16896	7.14587	7.51728	6.64402e-13	1.22453e-11	18.3721	up	Immunity_high vs Immunity_low
EGFLAM	133584	0.746758	7.54007	6.22721	1.6173e-09	1.97653e-08	10.7312	up	Immunity_high vs Immunity_low
EGFR	1956	-0.79713	7.20773	-4.12041	4.90946e-05	0.000245935	0.761764	down	Immunity_high vs Immunity_low
EGR2	1959	0.938704	7.54878	6.50368	3.31506e-10	4.49717e-09	12.2796	up	Immunity_high vs Immunity_low
EHF	26298	-0.835562	7.05489	-4.76034	3.02331e-06	1.99398e-05	3.42601	down	Immunity_high vs Immunity_low
EIF4E3	317649	0.8091	7.49806	8.47285	1.12712e-15	2.73101e-14	24.6543	up	Immunity_high vs Immunity_low
ELAPOR1	57535	-0.72051	8.78753	-2.48916	0.0133518	0.0352854	-4.42844	down	Immunity_high vs Immunity_low
ELAVL1	1994	-0.59753	6.5007	-6.13739	2.6778e-09	3.15555e-08	10.2392	down	Immunity_high vs Immunity_low
ELF3	1999	-1.30322	8.84754	-8.09428	1.49234e-14	3.26656e-13	22.1078	down	Immunity_high vs Immunity_low
ELF5	2001	-1.32742	8.92541	-4.16415	4.09935e-05	0.000209051	0.933112	down	Immunity_high vs Immunity_low
ELL2	22936	0.650203	6.81197	8.15007	1.02436e-14	2.28359e-13	22.4786	up	Immunity_high vs Immunity_low
ELMO1	9844	1.11243	7.25479	12.9535	9.95636e-31	5.95542e-29	58.9859	up	Immunity_high vs Immunity_low
ELMO3	79767	-0.610737	6.97519	-6.33487	8.77632e-10	1.11701e-08	11.328	down	Immunity_high vs Immunity_low
EMILIN1	11117	0.770049	7.07472	7.36058	1.80541e-12	3.21743e-11	17.3897	up	Immunity_high vs Immunity_low
EMILIN2	84034	1.15011	8.0084	10.8502	2.51386e-23	9.88314e-22	42.0783	up	Immunity_high vs Immunity_low
EMP3	2014	1.50338	9.74444	17.5355	9.40063e-48	1.67036e-45	97.9383	up	Immunity_high vs Immunity_low
ENAH	55740	-0.632774	7.26405	-6.06058	4.10381e-09	4.68667e-08	9.82285	down	Immunity_high vs Immunity_low
ENG	2022	0.876318	8.0539	9.65063	2.398e-19	7.40398e-18	33.0064	up	Immunity_high vs Immunity_low
ENPP2	5168	1.81323	7.57713	12.9053	1.48662e-30	8.77641e-29	58.5879	up	Immunity_high vs Immunity_low
ENTPD1	953	1.11594	7.72254	13.6957	1.97252e-33	1.35931e-31	65.1666	up	Immunity_high vs Immunity_low
EOMES	8320	1.59588	6.97882	13.4045	2.28937e-32	1.49792e-30	62.7318	up	Immunity_high vs Immunity_low
EPAS1	2034	0.831116	9.04336	7.12955	7.68491e-12	1.27314e-10	15.9676	up	Immunity_high vs Immunity_low
EPB41L3	23136	0.951477	7.58478	8.20339	7.1394e-15	1.61139e-13	22.8343	up	Immunity_high vs Immunity_low
EPDR1	54749	0.604285	7.982	4.37059	1.71501e-05	9.62613e-05	1.76329	up	Immunity_high vs Immunity_low
EPHB3	2049	-1.08676	7.35037	-7.26482	3.30335e-12	5.67488e-11	16.7964	down	Immunity_high vs Immunity_low
EPHB4	2050	-0.784507	8.43961	-7.77604	1.23773e-13	2.50924e-12	20.0249	down	Immunity_high vs Immunity_low
EPPK1	83481	-0.81719	7.84979	-4.99772	9.92493e-07	7.25613e-06	4.49835	down	Immunity_high vs Immunity_low
EPSTI1	94240	1.75529	9.07858	13.1556	1.84303e-31	1.13616e-29	60.6607	up	Immunity_high vs Immunity_low
EPYC	1833	0.828345	6.36894	5.05844	7.41395e-07	5.5525e-06	4.77973	up	Immunity_high vs Immunity_low
ERAP2	64167	1.26446	7.10202	8.07181	1.73566e-14	3.77637e-13	21.959	up	Immunity_high vs Immunity_low
ERBB3	2065	-1.30362	8.79907	-8.36222	2.41529e-15	5.68503e-14	23.9027	down	Immunity_high vs Immunity_low
ERP27	121506	-0.698273	8.34521	-3.06586	0.00237	0.00782403	-2.86721	down	Immunity_high vs Immunity_low
ERRFI1	54206	-0.629646	9.26818	-3.91396	0.000112631	0.000519291	-0.0249464	down	Immunity_high vs Immunity_low
ESRP1	54845	-0.760914	6.60978	-8.52161	8.04004e-16	1.95857e-14	24.9875	down	Immunity_high vs Immunity_low
ETS1	2113	1.03354	8.28444	7.51491	6.74588e-13	1.24124e-11	18.3571	up	Immunity_high vs Immunity_low
ETV4	2118	-0.788257	6.27806	-6.77095	6.83983e-11	1.01031e-09	13.8243	down	Immunity_high vs Immunity_low
EVI2A	2123	1.62503	7.15292	17.3252	5.79195e-47	9.81059e-45	96.1309	up	Immunity_high vs Immunity_low
EVI2B	2124	2.35586	8.00194	25.5172	7.48485e-77	6.78277e-73	164.499	up	Immunity_high vs Immunity_low
EVL	51466	0.880689	10.824	8.07158	1.73838e-14	3.77775e-13	21.9575	up	Immunity_high vs Immunity_low
EVPL	2125	-1.00678	7.32203	-8.64303	3.45027e-16	8.63711e-15	25.8221	down	Immunity_high vs Immunity_low
EXO1	9156	-0.734371	7.57389	-5.6703	3.37705e-08	3.27432e-07	7.77149	down	Immunity_high vs Immunity_low
EXOSC4	54512	-0.769754	8.03553	-7.59553	4.01224e-13	7.61444e-12	18.868	down	Immunity_high vs Immunity_low
EYA2	2139	-0.675301	7.32669	-4.32698	2.06748e-05	0.00011391	1.58493	down	Immunity_high vs Immunity_low
F12	2161	-0.859649	7.86036	-5.24276	3.00799e-07	2.4524e-06	5.6513	down	Immunity_high vs Immunity_low
F13A1	2162	1.53901	7.19174	8.63149	3.74009e-16	9.2984e-15	25.7425	up	Immunity_high vs Immunity_low
FABP4	2167	1.36932	7.22327	5.38244	1.49357e-07	1.28728e-06	6.32901	up	Immunity_high vs Immunity_low
FAM183A	440585	-0.672302	6.45064	-4.97572	1.10239e-06	7.97285e-06	4.3971	down	Immunity_high vs Immunity_low
FAM210B	116151	-0.655047	8.67949	-5.63545	4.05565e-08	3.88092e-07	7.59362	down	Immunity_high vs Immunity_low
FAM30A	9834	0.746354	5.79691	8.28577	4.0758e-15	9.41017e-14	23.3868	up	Immunity_high vs Immunity_low
FAM43A	131583	0.66186	7.32456	7.09378	9.59048e-12	1.57444e-10	15.7502	up	Immunity_high vs Immunity_low
FAM71E1	112703	-0.897309	6.87283	-6.12763	2.82764e-09	3.31489e-08	10.1861	down	Immunity_high vs Immunity_low
FAM83D	81610	-0.689635	7.19363	-5.02386	8.75653e-07	6.47504e-06	4.61915	down	Immunity_high vs Immunity_low
FAM83H	286077	-1.1962	8.79135	-9.11447	1.21239e-17	3.32929e-16	29.1283	down	Immunity_high vs Immunity_low
FANCE	2178	-0.587824	7.16198	-6.05154	4.31422e-09	4.90533e-08	9.77411	down	Immunity_high vs Immunity_low
FAP	2191	0.731172	8.02337	4.56867	7.20337e-06	4.38395e-05	2.59291	up	Immunity_high vs Immunity_low
FAR2P2	100216479	-0.593265	6.42251	-4.00931	7.70805e-05	0.000368618	0.333899	down	Immunity_high vs Immunity_low
FARP1	10160	-0.916314	9.17374	-7.67896	2.33493e-13	4.57495e-12	19.4004	down	Immunity_high vs Immunity_low
FASLG	356	0.609395	5.73707	13.0281	5.34673e-31	3.21941e-29	59.6032	up	Immunity_high vs Immunity_low
FAXC	84553	-0.648071	6.31983	-7.77083	1.28078e-13	2.58784e-12	19.9912	down	Immunity_high vs Immunity_low
FBLN1	2192	0.739815	10.3439	4.46381	1.14453e-05	6.64641e-05	2.14971	up	Immunity_high vs Immunity_low
FBN3	84467	-0.800142	6.13602	-5.6456	3.8453e-08	3.69132e-07	7.64535	down	Immunity_high vs Immunity_low
FBP1	2203	1.52148	8.26282	8.59753	4.74098e-16	1.17065e-14	25.5086	up	Immunity_high vs Immunity_low
FBXL2	25827	-0.669633	6.70177	-7.73285	1.64252e-13	3.27491e-12	19.7465	down	Immunity_high vs Immunity_low
FCER1A	2205	1.05554	6.90116	5.47011	9.55612e-08	8.54863e-07	6.76184	up	Immunity_high vs Immunity_low
FCER1G	2207	1.78464	9.90671	15.0031	2.8935e-38	2.66202e-36	76.2237	up	Immunity_high vs Immunity_low
FCER2	2208	0.606521	5.60111	8.45713	1.25646e-15	3.02821e-14	24.5471	up	Immunity_high vs Immunity_low
FCGR1A	2209	0.972166	6.86778	11.4332	2.48595e-25	1.09891e-23	46.6543	up	Immunity_high vs Immunity_low
FCGR1B	2210	1.383	7.28291	10.4326	6.45287e-22	2.28422e-20	38.8634	up	Immunity_high vs Immunity_low
FCGR2A	2212	1.19202	8.01625	10.5211	3.25928e-22	1.18855e-20	39.5399	up	Immunity_high vs Immunity_low
FCGR2B	2213	0.830992	6.30015	10.469	4.87458e-22	1.74944e-20	39.1412	up	Immunity_high vs Immunity_low
FCGRT	2217	1.12142	9.39909	10.4216	7.02526e-22	2.47716e-20	38.7792	up	Immunity_high vs Immunity_low
FCHSD2	9873	0.771989	7.61297	10.5569	2.47057e-22	9.13807e-21	39.8143	up	Immunity_high vs Immunity_low
FCMR	9214	2.09417	7.49653	14.4492	3.29916e-36	2.6341e-34	71.5176	up	Immunity_high vs Immunity_low
FCN1	2219	1.94212	7.33137	15.2449	3.63297e-39	3.50234e-37	78.2857	up	Immunity_high vs Immunity_low
FCRL3	115352	1.27739	6.11865	13.473	1.28748e-32	8.51616e-31	63.3034	up	Immunity_high vs Immunity_low
FCRL5	83416	0.599501	5.91302	8.43378	1.47628e-15	3.52517e-14	24.3881	up	Immunity_high vs Immunity_low
FERMT3	83706	1.75066	8.47951	21.8555	8.54867e-64	7.04255e-61	134.646	up	Immunity_high vs Immunity_low
FES	2242	0.674646	7.62768	7.53345	5.98786e-13	1.11193e-11	18.4743	up	Immunity_high vs Immunity_low
FGD2	221472	1.64222	8.07779	17.3767	3.71034e-47	6.34398e-45	96.5735	up	Immunity_high vs Immunity_low
FGD3	89846	1.51447	8.11295	14.9103	6.41117e-38	5.75228e-36	75.4332	up	Immunity_high vs Immunity_low
FGFR3	2261	-1.05676	7.53814	-4.19697	3.57709e-05	0.000185869	1.06271	down	Immunity_high vs Immunity_low
FGFRL1	53834	-0.756703	7.73597	-5.67022	3.37838e-08	3.27432e-07	7.77111	down	Immunity_high vs Immunity_low
FGGY	55277	-0.650946	7.74889	-4.51463	9.15427e-06	5.43084e-05	2.3634	down	Immunity_high vs Immunity_low
FGL2	10875	2.04429	8.24337	20.4691	1.05838e-58	5.99439e-56	122.995	up	Immunity_high vs Immunity_low
FGR	2268	1.54452	7.82015	15.7797	3.64351e-41	4.00212e-39	82.8595	up	Immunity_high vs Immunity_low
FHDC1	85462	-0.630809	6.93284	-7.40483	1.36331e-12	2.46103e-11	17.6657	down	Immunity_high vs Immunity_low
FHL1	2273	0.802739	6.93929	5.55466	6.17989e-08	5.76782e-07	7.18469	up	Immunity_high vs Immunity_low
FILIP1L	11259	0.863966	7.74531	7.39575	1.4443e-12	2.59687e-11	17.609	up	Immunity_high vs Immunity_low
FKBP11	51303	1.25451	9.37343	9.97358	2.13788e-20	7.01936e-19	35.398	up	Immunity_high vs Immunity_low
FKBP4	2288	-1.01003	8.20865	-8.88299	6.35397e-17	1.66898e-15	27.4922	down	Immunity_high vs Immunity_low
FLNB	2317	-0.65106	9.56094	-6.27649	1.22372e-09	1.51909e-08	11.0034	down	Immunity_high vs Immunity_low
FLVCR2	55640	0.717837	7.02775	9.193	6.87519e-18	1.92888e-16	29.6888	up	Immunity_high vs Immunity_low
FMO1	2326	1.13267	6.92993	8.27827	4.28964e-15	9.8787e-14	23.3364	up	Immunity_high vs Immunity_low
FMO3	2328	0.747771	6.3587	4.2752	2.57605e-05	0.000138912	1.37527	up	Immunity_high vs Immunity_low
FNBP1	23048	0.942713	9.59571	9.75819	1.07664e-19	3.42935e-18	33.7985	up	Immunity_high vs Immunity_low
FNBP1L	54874	-0.867304	8.00091	-9.88478	4.17202e-20	1.34784e-18	34.7364	down	Immunity_high vs Immunity_low
FNTB	2342	0.652564	7.74065	3.73649	0.000223738	0.000958637	-0.672038	up	Immunity_high vs Immunity_low
FOLR1	2348	-0.780676	7.42996	-2.87347	0.00435258	0.0133292	-3.42217	down	Immunity_high vs Immunity_low
FOLR2	2350	1.74386	6.96916	13.255	8.02512e-32	5.08557e-30	61.4862	up	Immunity_high vs Immunity_low
FOS	2353	1.08169	9.2191	4.73578	3.38439e-06	2.20881e-05	3.31761	up	Immunity_high vs Immunity_low
FOSB	2354	0.904562	7.94584	3.93406	0.000104039	0.000482867	0.0500669	up	Immunity_high vs Immunity_low
FOXC1	2296	-1.55362	10.5893	-5.25451	2.83748e-07	2.32699e-06	5.70775	down	Immunity_high vs Immunity_low
FOXM1	2305	-0.784129	7.22418	-5.28175	2.47757e-07	2.05414e-06	5.83899	down	Immunity_high vs Immunity_low
FOXN3	1112	0.69959	8.74625	9.35234	2.1579e-18	6.23762e-17	30.834	up	Immunity_high vs Immunity_low
FOXO1	2308	0.839083	7.48098	9.91285	3.37822e-20	1.09923e-18	34.9452	up	Immunity_high vs Immunity_low
FOXP4	116113	-0.587781	6.55427	-6.01136	5.38394e-09	6.01965e-08	9.55823	down	Immunity_high vs Immunity_low
FPR1	2357	0.997502	6.68586	9.75555	1.09812e-19	3.49163e-18	33.7789	up	Immunity_high vs Immunity_low
FPR3	2359	1.29105	8.04154	12.0852	1.28078e-27	6.48402e-26	51.8799	up	Immunity_high vs Immunity_low
FUCA1	2517	1.45551	9.11905	14.2433	1.90574e-35	1.43318e-33	69.7753	up	Immunity_high vs Immunity_low
FUT8	2530	0.657203	6.81272	8.08091	1.63271e-14	3.5652e-13	22.0193	up	Immunity_high vs Immunity_low
FYN	2534	1.22045	7.81865	13.2002	1.26938e-31	7.90593e-30	61.0309	up	Immunity_high vs Immunity_low
FZD7	8324	-0.619061	8.00175	-4.02307	7.29295e-05	0.000351442	0.386344	down	Immunity_high vs Immunity_low
FZD9	8326	-0.993163	7.02983	-4.91148	1.49486e-06	1.05256e-05	4.10364	down	Immunity_high vs Immunity_low
GABBR2	9568	-0.741806	6.28592	-3.70749	0.000249685	0.00105436	-0.775186	down	Immunity_high vs Immunity_low
GABRP	2568	-1.22469	9.37965	-2.88222	0.00423674	0.0130257	-3.39767	down	Immunity_high vs Immunity_low
GALM	130589	1.02305	7.32747	10.5475	2.65647e-22	9.7659e-21	39.7424	up	Immunity_high vs Immunity_low
GAPDH	2597	-0.668659	10.921	-5.65681	3.62538e-08	3.49316e-07	7.70256	down	Immunity_high vs Immunity_low
GAPT	202309	1.19014	6.64686	12.3152	1.94974e-28	1.03024e-26	53.7477	up	Immunity_high vs Immunity_low
GAS7	8522	0.804761	6.91867	7.16199	6.28223e-12	1.0523e-10	16.1653	up	Immunity_high vs Immunity_low
GASK1B	51313	0.680565	7.90156	4.87653	1.76191e-06	1.22114e-05	3.94537	up	Immunity_high vs Immunity_low
GBP1	2633	1.43641	8.83655	9.52911	5.894e-19	1.76275e-17	32.117	up	Immunity_high vs Immunity_low
GBP2	2634	1.5155	10.5107	12.1994	5.03724e-28	2.59361e-26	52.8058	up	Immunity_high vs Immunity_low
GBP4	115361	1.77506	8.21136	12.5762	2.27528e-29	1.28066e-27	55.8797	up	Immunity_high vs Immunity_low
GBP5	115362	1.95167	7.81679	12.9486	1.03714e-30	6.18325e-29	58.9454	up	Immunity_high vs Immunity_low
GCAT	23464	-0.688286	7.38566	-6.37736	6.88049e-10	8.90729e-09	11.5658	down	Immunity_high vs Immunity_low
GCNT2	2651	-0.61188	7.50296	-4.26251	2.71782e-05	0.000145647	1.32423	down	Immunity_high vs Immunity_low
GEM	2669	0.763857	6.94934	5.72248	2.56318e-08	2.5581e-07	8.03948	up	Immunity_high vs Immunity_low
GGH	8836	-0.621524	8.76017	-3.68728	0.000269417	0.00112952	-0.846635	down	Immunity_high vs Immunity_low
GIMAP2	26157	0.909878	5.95794	12.0655	1.50367e-27	7.57013e-26	51.7207	up	Immunity_high vs Immunity_low
GIMAP4	55303	2.14182	9.57839	22.6633	9.97176e-67	1.29092e-63	141.355	up	Immunity_high vs Immunity_low
GIMAP5	55340	2.04639	7.73946	20.8555	3.96518e-60	2.56661e-57	126.259	up	Immunity_high vs Immunity_low
GIMAP6	474344	1.82102	7.70738	22.5668	2.2276e-66	2.69153e-63	140.557	up	Immunity_high vs Immunity_low
GIMAP7	168537	2.30335	8.37356	19.5446	2.84962e-55	9.74463e-53	115.146	up	Immunity_high vs Immunity_low
GINS2	51659	-1.2289	8.167	-8.65904	3.08442e-16	7.74267e-15	25.9327	down	Immunity_high vs Immunity_low
GIPC1	10755	-0.788422	10.2184	-8.27042	4.52575e-15	1.04092e-13	23.2836	down	Immunity_high vs Immunity_low
GIT2	9815	0.609745	6.44094	11.8004	1.29528e-26	6.08179e-25	49.5844	up	Immunity_high vs Immunity_low
GJA4	2701	0.75773	6.94931	8.35205	2.58987e-15	6.05661e-14	23.8339	up	Immunity_high vs Immunity_low
GK5	256356	-0.671152	6.81937	-7.30153	2.62208e-12	4.57828e-11	17.0232	down	Immunity_high vs Immunity_low
GLB1L2	89944	-0.667714	6.28869	-5.67408	3.31043e-08	3.21755e-07	7.79085	down	Immunity_high vs Immunity_low
GLIPR1	11010	1.086	7.91237	8.77344	1.38007e-16	3.54785e-15	26.7265	up	Immunity_high vs Immunity_low
GLRX	2745	1.09687	8.67015	10.4791	4.50926e-22	1.62155e-20	39.2184	up	Immunity_high vs Immunity_low
GLT8D2	83468	0.610423	7.51867	4.33475	1.99997e-05	0.000110544	1.6166	up	Immunity_high vs Immunity_low
GMDS	2762	-0.652657	9.74761	-4.69737	4.03363e-06	2.58689e-05	3.14907	down	Immunity_high vs Immunity_low
GMFG	9535	1.95652	8.29591	22.1491	7.29036e-65	6.95424e-62	137.092	up	Immunity_high vs Immunity_low
GMIP	51291	0.726145	7.10828	9.54174	5.36965e-19	1.6166e-17	32.2091	up	Immunity_high vs Immunity_low
GMPS	8833	-0.709181	9.15983	-6.72014	9.26519e-11	1.34338e-09	13.527	down	Immunity_high vs Immunity_low
GNA11	2767	-0.586216	8.51064	-6.56189	2.35969e-10	3.24977e-09	12.6121	down	Immunity_high vs Immunity_low
GNAI2	2771	0.85963	9.8684	12.028	2.04056e-27	1.01047e-25	51.4178	up	Immunity_high vs Immunity_low
GNAS	2778	-0.724354	13.0163	-8.71775	2.0429e-16	5.20021e-15	26.3393	down	Immunity_high vs Immunity_low
GNG10	2790	0.695228	8.16218	4.95026	1.24425e-06	8.8993e-06	4.28042	up	Immunity_high vs Immunity_low
GNG11	2791	0.947578	8.08663	7.01428	1.56487e-11	2.50989e-10	15.2699	up	Immunity_high vs Immunity_low
GNG2	54331	0.943987	6.1556	14.6576	5.56964e-37	4.60932e-35	73.2851	up	Immunity_high vs Immunity_low
GNG4	2786	-0.610911	6.09842	-4.11649	4.989e-05	0.000249298	0.746504	down	Immunity_high vs Immunity_low
GNGT2	2793	0.626981	6.03286	14.5692	1.18511e-36	9.6752e-35	72.5348	up	Immunity_high vs Immunity_low
GNLY	10578	2.22242	7.8442	13.227	1.01474e-31	6.40809e-30	61.2533	up	Immunity_high vs Immunity_low
GOLGA2P10	80154	-1.22311	8.20148	-9.96671	2.25174e-20	7.37983e-19	35.3466	down	Immunity_high vs Immunity_low
GOLT1A	127845	-0.719016	6.66697	-6.0064	5.53265e-09	6.16311e-08	9.53168	down	Immunity_high vs Immunity_low
GP1BB	2812	-0.928627	8.50848	-5.76822	2.00974e-08	2.04059e-07	8.27598	down	Immunity_high vs Immunity_low
GPAA1	8733	-0.955257	8.63466	-8.77351	1.37943e-16	3.54785e-15	26.7269	down	Immunity_high vs Immunity_low
GPNMB	10457	0.984421	10.2637	6.39923	6.06804e-10	7.92342e-09	11.6886	up	Immunity_high vs Immunity_low
GPR132	29933	0.634062	5.78881	16.5069	6.84385e-44	8.61375e-42	89.0987	up	Immunity_high vs Immunity_low
GPR18	2841	1.21461	6.03818	14.3568	7.24851e-36	5.5903e-34	70.7356	up	Immunity_high vs Immunity_low
GPR183	1880	1.93094	7.88559	16.6821	1.50603e-44	2.05228e-42	90.6035	up	Immunity_high vs Immunity_low
GPR34	2857	1.10779	6.52549	9.32617	2.61205e-18	7.49063e-17	30.6452	up	Immunity_high vs Immunity_low
GPR37	2861	-0.658609	6.96558	-5.14289	4.91918e-07	3.83134e-06	5.17583	down	Immunity_high vs Immunity_low
GPR65	8477	0.962658	6.61489	11.7182	2.51656e-26	1.15762e-24	48.9256	up	Immunity_high vs Immunity_low
GPR68	8111	1.05407	6.934	10.8504	2.51095e-23	9.88314e-22	42.0794	up	Immunity_high vs Immunity_low
GPRIN2	9721	-0.952733	6.49633	-6.50287	3.33077e-10	4.5151e-09	12.275	down	Immunity_high vs Immunity_low
GPSM1	26086	-0.589358	8.48368	-4.82011	2.29305e-06	1.5542e-05	3.69183	down	Immunity_high vs Immunity_low
GPSM2	29899	-0.927736	7.6542	-7.72912	1.68313e-13	3.34853e-12	19.7224	down	Immunity_high vs Immunity_low
GPSM3	63940	1.71657	7.3034	23.2394	8.40134e-69	1.56851e-65	146.099	up	Immunity_high vs Immunity_low
GPT	2875	-0.63866	6.39871	-4.32348	2.09858e-05	0.000115396	1.57069	down	Immunity_high vs Immunity_low
GPT2	84706	-1.1099	8.90622	-7.86837	6.73639e-14	1.40334e-12	20.6236	down	Immunity_high vs Immunity_low
GPX1	2876	0.801681	11.1355	10.7817	4.29824e-23	1.66101e-21	41.5468	up	Immunity_high vs Immunity_low
GPX3	2878	1.08904	8.44284	7.0778	1.05855e-11	1.72995e-10	15.6534	up	Immunity_high vs Immunity_low
GRAMD2A	196996	-0.690901	6.72911	-4.28091	2.51459e-05	0.0001358	1.39828	down	Immunity_high vs Immunity_low
GRAP	10750	1.36986	7.48524	15.319	1.92191e-39	1.89308e-37	78.9185	up	Immunity_high vs Immunity_low
GRHL2	79977	-1.03866	7.13395	-10.4332	6.42495e-22	2.27878e-20	38.8677	down	Immunity_high vs Immunity_low
GRK5	2869	0.628691	6.94852	8.66267	3.00702e-16	7.55884e-15	25.9578	up	Immunity_high vs Immunity_low
GRN	2896	0.855225	9.453	8.63718	3.5944e-16	8.97313e-15	25.7817	up	Immunity_high vs Immunity_low
GRP	2922	-0.689039	6.95419	-3.18548	0.00159883	0.00555118	-2.50514	down	Immunity_high vs Immunity_low
GRTP1	79774	-0.840601	7.19666	-8.2953	3.81888e-15	8.82823e-14	23.451	down	Immunity_high vs Immunity_low
GSTO1	9446	0.649426	10.0467	7.67479	2.39918e-13	4.6907e-12	19.3737	up	Immunity_high vs Immunity_low
GSTO2	119391	-1.12484	7.97448	-5.47461	9.33826e-08	8.36612e-07	6.7842	down	Immunity_high vs Immunity_low
GTF2IRD1	9569	-0.649557	7.21827	-9.18604	7.23054e-18	2.02232e-16	29.639	down	Immunity_high vs Immunity_low
GTPBP4	23560	-0.607173	10.0897	-5.09557	6.19441e-07	4.73303e-06	4.95321	down	Immunity_high vs Immunity_low
GVINP1	387751	1.84833	7.58	12.7489	5.44877e-30	3.16518e-28	57.2985	up	Immunity_high vs Immunity_low
GYPC	2995	1.28251	8.349	8.91794	4.95515e-17	1.31105e-15	27.7378	up	Immunity_high vs Immunity_low
GZMA	3001	2.40212	7.6382	19.6341	1.32344e-55	4.70315e-53	115.908	up	Immunity_high vs Immunity_low
GZMB	3002	2.47197	7.76977	15.4977	4.13509e-40	4.16358e-38	80.4453	up	Immunity_high vs Immunity_low
GZMH	2999	1.32363	6.77781	11.2973	7.3509e-25	3.17966e-23	45.5793	up	Immunity_high vs Immunity_low
GZMK	3003	2.9639	7.90123	19.349	1.52619e-54	5.02922e-52	113.478	up	Immunity_high vs Immunity_low
H1-0	3005	-0.606137	10.5582	-5.23078	3.19197e-07	2.5919e-06	5.59389	down	Immunity_high vs Immunity_low
H2AW	92815	-0.738639	7.59773	-4.45704	1.1789e-05	6.82631e-05	2.12141	down	Immunity_high vs Immunity_low
H2BC5	3017	-0.912613	8.99392	-5.25236	2.86793e-07	2.34586e-06	5.69743	down	Immunity_high vs Immunity_low
H4C8	8365	-0.671938	7.40543	-3.09791	0.00213529	0.00715079	-2.77148	down	Immunity_high vs Immunity_low
HBA2	3040	1.27586	8.74049	5.10682	5.86501e-07	4.50222e-06	5.00597	up	Immunity_high vs Immunity_low
HBB	3043	1.42996	8.47928	5.3842	1.48031e-07	1.28002e-06	6.33765	up	Immunity_high vs Immunity_low
HCLS1	3059	2.23457	9.45099	24.4362	4.60366e-73	1.66874e-69	155.84	up	Immunity_high vs Immunity_low
HCST	10870	2.44286	10.0921	24.9337	8.16799e-75	3.70092e-71	159.842	up	Immunity_high vs Immunity_low
HEBP2	23593	-0.600643	9.92289	-4.63708	5.30088e-06	3.31173e-05	2.8869	down	Immunity_high vs Immunity_low
HEG1	57493	0.664963	7.20603	8.76197	1.49638e-16	3.84141e-15	26.6466	up	Immunity_high vs Immunity_low
HERPUD1	9709	1.03563	9.45869	7.40842	1.33254e-12	2.41028e-11	17.6881	up	Immunity_high vs Immunity_low
HES1	3280	-0.715265	7.37898	-7.59045	4.14614e-13	7.84391e-12	18.8357	down	Immunity_high vs Immunity_low
HES4	57801	-0.680785	9.9683	-4.81445	2.35408e-06	1.59021e-05	3.66656	down	Immunity_high vs Immunity_low
HES6	55502	-0.75882	7.57944	-5.28485	2.4395e-07	2.02535e-06	5.85397	down	Immunity_high vs Immunity_low
HEXB	3074	0.59471	10.9805	8.10701	1.36977e-14	3.01378e-13	22.1923	up	Immunity_high vs Immunity_low
HEY2	23493	-0.788588	7.32961	-3.68235	0.000274447	0.00114901	-0.864005	down	Immunity_high vs Immunity_low
HHEX	3087	0.777145	6.2273	13.7329	1.4406e-33	1.00036e-31	65.4787	up	Immunity_high vs Immunity_low
HILPDA	29923	-0.628167	7.04136	-5.93207	8.30919e-09	8.96404e-08	9.1355	down	Immunity_high vs Immunity_low
HJURP	55355	-0.72757	7.37376	-6.06615	3.97914e-09	4.55775e-08	9.85293	down	Immunity_high vs Immunity_low
HK3	3101	0.950881	6.5445	9.03382	2.16479e-17	5.84718e-16	28.5556	up	Immunity_high vs Immunity_low
HLA-B	3106	1.45248	12.2515	11.9245	4.73677e-27	2.25919e-25	50.5823	up	Immunity_high vs Immunity_low
HLA-C	3107	0.933526	7.62617	6.13249	2.75203e-09	3.23671e-08	10.2125	up	Immunity_high vs Immunity_low
HLA-DMA	3108	1.72596	11.3116	18.2931	1.35209e-50	3.02535e-48	104.443	up	Immunity_high vs Immunity_low
HLA-DMB	3109	1.86837	11.0833	20.556	5.04894e-59	2.95184e-56	123.73	up	Immunity_high vs Immunity_low
HLA-DOA	3111	1.93306	8.26815	19.0198	2.5836e-53	7.67624e-51	110.666	up	Immunity_high vs Immunity_low
HLA-DOB	3112	1.33791	7.07321	10.7384	6.02661e-23	2.30922e-21	41.2119	up	Immunity_high vs Immunity_low
HLA-DPA1	3113	2.10539	11.6239	17.7177	1.94651e-48	3.63696e-46	99.5036	up	Immunity_high vs Immunity_low
HLA-DPB1	3115	1.75458	7.3123	17.8724	5.11231e-49	1.01819e-46	100.833	up	Immunity_high vs Immunity_low
HLA-DQA1	3117	2.64504	10.5704	17.9905	1.84323e-49	3.75355e-47	101.847	up	Immunity_high vs Immunity_low
HLA-DQB1	3119	0.948134	7.53693	4.24455	2.93129e-05	0.000155797	1.25221	up	Immunity_high vs Immunity_low
HLA-DRA	3122	1.90675	12.5087	15.7111	6.57858e-41	7.09704e-39	82.2723	up	Immunity_high vs Immunity_low
HLA-DRB4	3126	1.90574	8.21777	6.37754	6.8736e-10	8.90473e-09	11.5668	up	Immunity_high vs Immunity_low
HLA-E	3133	1.59358	9.56903	18.5922	1.02597e-51	2.54722e-49	107.006	up	Immunity_high vs Immunity_low
HLA-F	3134	1.42604	8.51112	11.5515	9.62526e-26	4.29675e-24	47.5952	up	Immunity_high vs Immunity_low
HLA-G	3135	0.864915	7.28482	6.92468	2.7049e-11	4.17903e-10	14.7333	up	Immunity_high vs Immunity_low
HLA-H	3136	1.29208	8.85873	7.05434	1.22329e-11	1.98663e-10	15.5115	up	Immunity_high vs Immunity_low
HLX	3142	0.601526	6.72194	8.53997	7.078e-16	1.72654e-14	25.1132	up	Immunity_high vs Immunity_low
HMGB3	3149	-0.808577	7.67878	-6.09793	3.33604e-09	3.88077e-08	10.0248	down	Immunity_high vs Immunity_low
HMOX1	3162	1.05277	7.41271	8.01305	2.57353e-14	5.51331e-13	21.5711	up	Immunity_high vs Immunity_low
HNMT	3176	0.937945	7.8389	8.15111	1.01724e-14	2.27051e-13	22.4854	up	Immunity_high vs Immunity_low
HOMER2	9455	-1.13072	7.62131	-7.63812	3.04479e-13	5.87687e-12	19.1393	down	Immunity_high vs Immunity_low
HOOK1	51361	-1.02017	8.05421	-7.70498	1.97054e-13	3.89042e-12	19.5673	down	Immunity_high vs Immunity_low
HOPX	84525	0.807026	8.10194	4.65189	4.95816e-06	3.11803e-05	2.95101	up	Immunity_high vs Immunity_low
HOXC13	3229	-0.714789	6.54667	-7.02667	1.45024e-11	2.3343e-10	15.3445	down	Immunity_high vs Immunity_low
HPN	3249	-0.69057	6.57386	-4.39439	1.5478e-05	8.77184e-05	1.86124	down	Immunity_high vs Immunity_low
HS3ST3A1	9955	0.736384	7.19562	5.46587	9.76564e-08	8.71026e-07	6.74081	up	Immunity_high vs Immunity_low
HSD11B1	3290	1.12916	6.33978	13.4521	1.5349e-32	1.01159e-30	63.1289	up	Immunity_high vs Immunity_low
HSD11B1L	374875	-0.592191	6.66834	-6.03865	4.63247e-09	5.24743e-08	9.70474	down	Immunity_high vs Immunity_low
HSD17B11	51170	1.3927	7.44182	11.3073	6.78844e-25	2.95754e-23	45.6582	up	Immunity_high vs Immunity_low
HSPB6	126393	0.669515	6.32534	5.16633	4.38571e-07	3.45294e-06	5.28674	up	Immunity_high vs Immunity_low
HTRA1	5654	0.621482	10.7216	3.46593	0.00060634	0.00234114	-1.60579	up	Immunity_high vs Immunity_low
HVCN1	84329	0.596398	5.81125	12.4327	7.42643e-29	4.05412e-27	54.7056	up	Immunity_high vs Immunity_low
ICAM2	3384	1.11535	8.29436	10.8877	1.87355e-23	7.44656e-22	42.3696	up	Immunity_high vs Immunity_low
ICAM3	3385	1.17355	8.54989	10.8206	3.17162e-23	1.23353e-21	41.848	up	Immunity_high vs Immunity_low
ICOS	29851	1.41679	6.79271	15.2668	3.01019e-39	2.93315e-37	78.4726	up	Immunity_high vs Immunity_low
ID3	3399	0.754528	8.84642	4.79779	2.54319e-06	1.7021e-05	3.59225	up	Immunity_high vs Immunity_low
IDO1	3620	1.76574	7.24919	10.4591	5.259e-22	1.88368e-20	39.066	up	Immunity_high vs Immunity_low
IFFO1	25900	1.31171	8.10754	14.7491	2.54817e-37	2.16821e-35	74.062	up	Immunity_high vs Immunity_low
IFI16	3428	1.36666	8.53165	12.1956	5.19393e-28	2.66671e-26	52.7754	up	Immunity_high vs Immunity_low
IFI27	3429	0.941534	11.7829	4.92322	1.41427e-06	9.99694e-06	4.15703	up	Immunity_high vs Immunity_low
IFI27L2	83982	0.787717	6.96357	8.20851	6.89581e-15	1.5603e-13	22.8685	up	Immunity_high vs Immunity_low
IFI30	10437	1.27243	8.60027	11.0258	6.32454e-24	2.58167e-22	43.4459	up	Immunity_high vs Immunity_low
IFI35	3430	1.14207	8.72194	9.92349	3.11838e-20	1.0165e-18	35.0244	up	Immunity_high vs Immunity_low
IFI44	10561	0.911409	9.17945	5.79398	1.75126e-08	1.79931e-07	8.40987	up	Immunity_high vs Immunity_low
IFI44L	10964	1.02548	8.93086	5.119	5.52749e-07	4.25892e-06	5.06321	up	Immunity_high vs Immunity_low
IFI6	2537	0.611741	9.53853	2.86969	0.00440349	0.0134653	-3.43273	up	Immunity_high vs Immunity_low
IFIH1	64135	0.61089	8.4477	4.18949	3.69021e-05	0.000191144	1.03309	up	Immunity_high vs Immunity_low
IFIT2	3433	0.635052	8.376	3.84293	0.000148696	0.00066411	-0.28721	up	Immunity_high vs Immunity_low
IFIT3	3437	0.738272	8.06827	4.60165	6.21625e-06	3.82688e-05	2.73415	up	Immunity_high vs Immunity_low
IFITM1	8519	0.978481	11.0412	6.12866	2.8115e-09	3.30237e-08	10.1916	up	Immunity_high vs Immunity_low
IFNG	3458	1.11597	6.03336	11.7367	2.16648e-26	1.00167e-24	49.0742	up	Immunity_high vs Immunity_low
IFT122	55764	-0.652866	7.82984	-4.94161	1.29636e-06	9.22108e-06	4.24089	down	Immunity_high vs Immunity_low
IGFBP4	3487	1.01333	10.0504	6.6225	1.65255e-10	2.31281e-09	12.9606	up	Immunity_high vs Immunity_low
IGFBP6	3489	0.956228	7.28111	7.63406	3.12611e-13	6.01461e-12	19.1134	up	Immunity_high vs Immunity_low
IGFBP7	3490	0.743721	11.491	5.44997	1.05937e-07	9.39334e-07	6.6619	up	Immunity_high vs Immunity_low
IGFLR1	79713	1.47492	7.68556	16.1056	2.19062e-42	2.51283e-40	85.6537	up	Immunity_high vs Immunity_low
IGHG1	3500	3.34268	9.19122	9.86188	4.95491e-20	1.59508e-18	34.5662	up	Immunity_high vs Immunity_low
IGHV5-78	28387	0.826049	5.87088	10.1546	5.42325e-21	1.81684e-19	36.7557	up	Immunity_high vs Immunity_low
IGKC	3514	3.00676	11.5155	8.74769	1.65482e-16	4.23017e-15	26.5473	up	Immunity_high vs Immunity_low
IGLL1	3543	1.56463	12.5198	5.81499	1.56484e-08	1.61533e-07	8.51936	up	Immunity_high vs Immunity_low
IGSF3	3321	-1.24894	8.54229	-9.987	1.93201e-20	6.36649e-19	35.4982	down	Immunity_high vs Immunity_low
IGSF6	10261	1.59634	7.33	17.6511	3.46226e-48	6.40306e-46	98.9311	up	Immunity_high vs Immunity_low
IGSF9	57549	-0.893128	7.05571	-6.84178	4.46882e-11	6.75504e-10	14.2413	down	Immunity_high vs Immunity_low
IL10RA	3587	1.80705	7.33048	25.2008	9.48539e-76	5.73044e-72	161.979	up	Immunity_high vs Immunity_low
IL10RB	3588	0.620662	7.76506	6.62298	1.64792e-10	2.3081e-09	12.9634	up	Immunity_high vs Immunity_low
IL15	3600	0.781438	6.62013	8.38724	2.03398e-15	4.80623e-14	24.0721	up	Immunity_high vs Immunity_low
IL16	3603	0.791051	6.40358	13.2174	1.09909e-31	6.91663e-30	61.174	up	Immunity_high vs Immunity_low
IL17RB	55540	-0.926053	7.36549	-5.63945	3.97149e-08	3.80304e-07	7.61398	down	Immunity_high vs Immunity_low
IL18BP	10068	1.79051	8.75959	18.218	2.5855e-50	5.64573e-48	103.799	up	Immunity_high vs Immunity_low
IL18R1	8809	0.914687	6.31932	13.0302	5.25416e-31	3.17421e-29	59.6205	up	Immunity_high vs Immunity_low
IL18RAP	8807	1.05917	6.19525	14.9664	3.96212e-38	3.60851e-36	75.9114	up	Immunity_high vs Immunity_low
IL1B	3553	0.620484	6.80968	5.25319	2.85613e-07	2.33888e-06	5.70141	up	Immunity_high vs Immunity_low
IL21R	50615	1.17789	6.49961	14.536	1.57327e-36	1.27866e-34	72.2533	up	Immunity_high vs Immunity_low
IL23A	51561	2.77292	8.39482	19.0785	1.55921e-53	4.78969e-51	111.168	up	Immunity_high vs Immunity_low
IL2RG	3561	0.715943	5.73795	14.3634	6.85697e-36	5.31093e-34	70.7908	up	Immunity_high vs Immunity_low
IL32	9235	1.1553	8.22478	8.42895	1.52622e-15	3.63486e-14	24.3553	up	Immunity_high vs Immunity_low
IL33	90865	1.09063	6.46478	9.0806	1.54714e-17	4.21026e-16	28.8874	up	Immunity_high vs Immunity_low
IL4R	3566	0.742254	7.57645	8.131	1.16518e-14	2.5848e-13	22.3516	up	Immunity_high vs Immunity_low
IL6	3569	1.00328	6.42784	7.72508	1.72815e-13	3.43433e-12	19.6965	up	Immunity_high vs Immunity_low
IL6ST	3572	0.915249	8.1149	9.62394	2.92308e-19	8.94896e-18	32.8105	up	Immunity_high vs Immunity_low
IL7R	3575	2.52103	7.96319	19.3766	1.20442e-54	4.04238e-52	113.713	up	Immunity_high vs Immunity_low
IMPA2	3613	-0.77126	8.86722	-4.69937	3.99712e-06	2.56802e-05	3.1578	down	Immunity_high vs Immunity_low
INAVA	55765	-1.27186	8.40493	-7.19636	5.07127e-12	8.58187e-11	16.3755	down	Immunity_high vs Immunity_low
INPP5D	3635	1.32067	6.8297	20.4533	1.21047e-58	6.64805e-56	122.862	up	Immunity_high vs Immunity_low
IQGAP2	10788	1.00086	6.83674	8.10225	1.41437e-14	3.1034e-13	22.1607	up	Immunity_high vs Immunity_low
IRAG2	4033	1.51804	6.52478	17.7285	1.77331e-48	3.34787e-46	99.5962	up	Immunity_high vs Immunity_low
IRAK3	11213	0.640792	6.48198	7.94734	3.98957e-14	8.45696e-13	21.1393	up	Immunity_high vs Immunity_low
IRF1	3659	1.64021	9.45833	14.0544	9.48096e-35	6.84594e-33	68.1814	up	Immunity_high vs Immunity_low
IRF6	3664	-1.1193	7.82369	-8.55851	6.22206e-16	1.52184e-14	25.2404	down	Immunity_high vs Immunity_low
IRF7	3665	1.05259	8.90437	8.07543	1.69397e-14	3.69454e-13	21.983	up	Immunity_high vs Immunity_low
IRF8	3394	2.41274	8.78722	22.2126	4.28498e-65	4.31449e-62	137.62	up	Immunity_high vs Immunity_low
IRF9	10379	0.757955	10.2125	7.78121	1.19637e-13	2.43356e-12	20.0583	up	Immunity_high vs Immunity_low
IRX2	153572	-0.857436	7.82288	-4.59223	6.48397e-06	3.98087e-05	2.69374	down	Immunity_high vs Immunity_low
IRX3	79191	-1.15375	11.4234	-6.64135	1.4786e-10	2.08708e-09	13.0695	down	Immunity_high vs Immunity_low
IRX4	50805	-0.623319	6.52741	-3.37886	0.000825047	0.00306543	-1.89252	down	Immunity_high vs Immunity_low
IRX5	10265	-0.886897	7.2501	-6.73001	8.73597e-11	1.26867e-09	13.5846	down	Immunity_high vs Immunity_low
ISCU	23479	0.798567	10.0122	11.3159	6.33893e-25	2.77458e-23	45.7261	up	Immunity_high vs Immunity_low
ISG20	3669	1.34585	9.67206	9.312	2.89643e-18	8.27996e-17	30.543	up	Immunity_high vs Immunity_low
ITGA4	3676	0.671403	5.98566	17.2937	7.60451e-47	1.26444e-44	95.8602	up	Immunity_high vs Immunity_low
ITGAX	3687	1.38314	7.58705	13.9419	2.46138e-34	1.7563e-32	67.2337	up	Immunity_high vs Immunity_low
ITGB2	3689	1.81752	11.0068	18.3993	5.41155e-51	1.24151e-48	105.354	up	Immunity_high vs Immunity_low
ITGB4	3691	-0.95377	7.83021	-5.48053	9.05882e-08	8.14395e-07	6.81367	down	Immunity_high vs Immunity_low
ITGB7	3695	1.52956	7.48657	14.463	2.93374e-36	2.3527e-34	71.6343	up	Immunity_high vs Immunity_low
ITK	3702	1.89776	6.94901	19.8671	1.80184e-56	7.42195e-54	117.89	up	Immunity_high vs Immunity_low
ITM2A	9452	2.06238	8.9469	11.5916	6.97735e-26	3.1379e-24	47.9142	up	Immunity_high vs Immunity_low
ITM2B	9445	0.741696	11.27	7.10136	9.15103e-12	1.50639e-10	15.7962	up	Immunity_high vs Immunity_low
ITM2C	81618	0.890007	9.42351	6.36167	7.52864e-10	9.65669e-09	11.4778	up	Immunity_high vs Immunity_low
ITPR1	3708	0.843469	6.87635	7.96497	3.54763e-14	7.54662e-13	21.255	up	Immunity_high vs Immunity_low
JADE2	23338	0.820719	7.45965	8.20764	6.93672e-15	1.5676e-13	22.8627	up	Immunity_high vs Immunity_low
JADE3	9767	-0.637297	8.31548	-6.49285	3.53056e-10	4.77098e-09	12.218	down	Immunity_high vs Immunity_low
JAK1	3716	0.60101	7.71492	5.80849	1.62034e-08	1.67048e-07	8.48545	up	Immunity_high vs Immunity_low
JAK2	3717	0.698353	6.39011	13.5645	5.96515e-33	4.03404e-31	64.0675	up	Immunity_high vs Immunity_low
JAM2	58494	0.676353	6.54868	7.66883	2.49402e-13	4.86562e-12	19.3356	up	Immunity_high vs Immunity_low
JAML	120425	1.75675	7.17827	20.1157	2.15299e-57	9.43424e-55	120.001	up	Immunity_high vs Immunity_low
JCHAIN	3512	2.48126	8.26715	9.56556	4.50323e-19	1.3694e-17	32.3831	up	Immunity_high vs Immunity_low
JMJD4	65094	-0.599726	7.24563	-6.14923	2.50633e-09	2.96893e-08	10.3037	down	Immunity_high vs Immunity_low
JUP	3728	-1.009	10.6842	-7.94874	3.95258e-14	8.38835e-13	21.1485	down	Immunity_high vs Immunity_low
KANK4	163782	-1.39233	7.91284	-5.93149	8.33538e-09	8.98347e-08	9.13244	down	Immunity_high vs Immunity_low
KAZN	23254	-0.937217	7.05488	-9.54399	5.28142e-19	1.59269e-17	32.2255	down	Immunity_high vs Immunity_low
KBTBD8	84541	0.706853	6.3232	11.3065	6.83151e-25	2.96917e-23	45.6519	up	Immunity_high vs Immunity_low
KCNG1	3755	-0.63572	6.72612	-3.96834	9.08058e-05	0.000427138	0.178747	down	Immunity_high vs Immunity_low
KCNK1	3775	-0.630491	7.71123	-4.06997	6.03252e-05	0.000296457	0.566238	down	Immunity_high vs Immunity_low
KCNMA1	3778	0.603071	7.18892	4.4777	1.07695e-05	6.29695e-05	2.20791	up	Immunity_high vs Immunity_low
KCNS3	3790	-0.659805	7.35604	-4.62887	5.50073e-06	3.4236e-05	2.8514	down	Immunity_high vs Immunity_low
KCTD12	115207	1.18638	8.2778	12.7085	7.61731e-30	4.38273e-28	56.9659	up	Immunity_high vs Immunity_low
KCTD3	51133	-0.672166	8.65858	-7.85093	7.55929e-14	1.56042e-12	20.5102	down	Immunity_high vs Immunity_low
KCTD5	54442	-0.720794	8.73478	-7.1362	7.37436e-12	1.2273e-10	16.008	down	Immunity_high vs Immunity_low
KDF1	126695	-0.743469	6.71774	-9.12841	1.09641e-17	3.02457e-16	29.2276	down	Immunity_high vs Immunity_low
KDM5B	10765	-0.823668	9.47489	-8.63651	3.61117e-16	9.00259e-15	25.7772	down	Immunity_high vs Immunity_low
KHDRBS3	10656	-0.963765	9.11954	-5.34333	1.8196e-07	1.54611e-06	6.13777	down	Immunity_high vs Immunity_low
KIAA0895	23366	-0.642574	6.30268	-7.93777	4.25181e-14	8.99181e-13	21.0767	down	Immunity_high vs Immunity_low
KIAA1522	57648	-0.84622	7.91183	-7.64702	2.87397e-13	5.57685e-12	19.1961	down	Immunity_high vs Immunity_low
KIAA1671	85379	-0.636547	8.89318	-5.78001	1.88709e-08	1.92903e-07	8.33721	down	Immunity_high vs Immunity_low
KIF1A	547	-0.841948	7.11978	-2.88652	0.00418091	0.0128737	-3.38561	down	Immunity_high vs Immunity_low
KIF20A	10112	-0.716796	7.86098	-5.47942	9.11055e-08	8.1864e-07	6.80814	down	Immunity_high vs Immunity_low
KIF23	9493	-0.620665	6.96721	-5.91875	8.93405e-09	9.58111e-08	9.0649	down	Immunity_high vs Immunity_low
KIF2C	11004	-0.67669	7.60596	-5.32045	2.04131e-07	1.71519e-06	6.02645	down	Immunity_high vs Immunity_low
KIFC1	3833	-0.780661	7.61754	-5.99481	5.8963e-09	6.52807e-08	9.46965	down	Immunity_high vs Immunity_low
KIFC2	90990	-0.66883	7.34054	-6.36298	7.47249e-10	9.59146e-09	11.4852	down	Immunity_high vs Immunity_low
KLF2	10365	1.17503	9.90065	9.70801	1.5652e-19	4.92493e-18	33.4283	up	Immunity_high vs Immunity_low
KLF4	9314	0.590512	6.99161	4.31886	2.14029e-05	0.000117441	1.55192	up	Immunity_high vs Immunity_low
KLF9	687	0.589068	8.77998	4.69545	4.06913e-06	2.60781e-05	3.14066	up	Immunity_high vs Immunity_low
KLHDC9	126823	-0.593776	6.72754	-4.23425	3.06097e-05	0.00016174	1.21099	down	Immunity_high vs Immunity_low
KLHL35	283212	-0.628354	7.3348	-4.76288	2.98813e-06	1.97221e-05	3.43726	down	Immunity_high vs Immunity_low
KLHL6	89857	1.39835	6.38142	20.9655	1.56062e-60	1.04758e-57	127.185	up	Immunity_high vs Immunity_low
KLK5	25818	-1.3009	7.78652	-3.4918	0.00055264	0.00215121	-1.51928	down	Immunity_high vs Immunity_low
KLK7	5650	-0.828965	7.2157	-2.95799	0.00334532	0.0105849	-3.18255	down	Immunity_high vs Immunity_low
KLRB1	3820	2.27926	7.20207	19.801	3.1703e-56	1.2491e-53	117.328	up	Immunity_high vs Immunity_low
KLRD1	3824	1.06044	6.36796	15.3313	1.72988e-39	1.72266e-37	79.0231	up	Immunity_high vs Immunity_low
KLRG1	10219	1.26927	6.60321	16.0367	3.97244e-42	4.47184e-40	85.0621	up	Immunity_high vs Immunity_low
KRT14	3861	-0.887843	7.36825	-2.90539	0.00394351	0.0122175	-3.33245	down	Immunity_high vs Immunity_low
KRT15	3866	-1.47927	8.36064	-5.32908	1.95475e-07	1.65102e-06	6.0684	down	Immunity_high vs Immunity_low
KRT16	3868	-0.990055	6.89554	-5.12307	5.41897e-07	4.18107e-06	5.08236	down	Immunity_high vs Immunity_low
KRT16P3	644945	-1.17351	7.63575	-4.73593	3.38198e-06	2.20803e-05	3.3183	down	Immunity_high vs Immunity_low
KRT17	3872	-1.40021	9.24625	-4.58848	6.5938e-06	4.04419e-05	2.67764	down	Immunity_high vs Immunity_low
KRT18	3875	-1.13308	10.3347	-5.91958	8.89389e-09	9.54369e-08	9.06928	down	Immunity_high vs Immunity_low
KRT18P55	284085	-0.880772	8.74825	-4.75283	3.12952e-06	2.05729e-05	3.39283	down	Immunity_high vs Immunity_low
KRT19	3880	-1.50824	11.7728	-6.26603	1.29853e-09	1.60427e-08	10.9455	down	Immunity_high vs Immunity_low
KRT23	25984	-0.707359	7.88848	-3.34197	0.000938283	0.00344031	-2.01198	down	Immunity_high vs Immunity_low
KRT5	3852	-0.926734	7.55575	-3.35973	0.000882074	0.00325122	-1.95462	down	Immunity_high vs Immunity_low
KRT6B	3854	-1.41728	9.29509	-3.65985	0.000298557	0.00123709	-0.94304	down	Immunity_high vs Immunity_low
KRT7	3855	-1.33711	10.0246	-6.38986	6.4039e-10	8.33196e-09	11.6359	down	Immunity_high vs Immunity_low
KRT8	3856	-1.32237	9.45438	-7.30942	2.49478e-12	4.36021e-11	17.0721	down	Immunity_high vs Immunity_low
KRT80	144501	-0.809132	7.52985	-4.90295	1.55618e-06	1.09119e-05	4.06492	down	Immunity_high vs Immunity_low
KRT81	3887	-1.23369	8.47801	-2.97878	0.0031327	0.010003	-3.1226	down	Immunity_high vs Immunity_low
KRTCAP3	200634	-0.865591	7.07705	-7.13095	7.6187e-12	1.26332e-10	15.976	down	Immunity_high vs Immunity_low
KYNU	8942	0.656163	6.93338	3.88597	0.000125719	0.000572496	-0.128795	up	Immunity_high vs Immunity_low
LACTB	114294	0.849053	7.93586	10.1684	4.88414e-21	1.64536e-19	36.8593	up	Immunity_high vs Immunity_low
LAD1	3898	-0.957224	10.1492	-4.64711	5.06636e-06	3.17836e-05	2.9303	down	Immunity_high vs Immunity_low
LAG3	3902	1.49834	7.27396	10.6711	1.01832e-22	3.82112e-21	40.6923	up	Immunity_high vs Immunity_low
LAIR1	3903	0.907382	6.2584	14.592	9.75835e-37	8.03911e-35	72.7279	up	Immunity_high vs Immunity_low
LAIR2	3904	0.988398	6.53433	16.9926	1.02815e-45	1.55284e-43	93.2716	up	Immunity_high vs Immunity_low
LAMB3	3914	-0.605311	7.28296	-3.36157	0.000876421	0.00323311	-1.94865	down	Immunity_high vs Immunity_low
LAMC2	3918	-0.998775	7.30143	-5.05441	7.55946e-07	5.65213e-06	4.76097	down	Immunity_high vs Immunity_low
LAMP3	27074	1.29205	7.83118	7.18905	5.30777e-12	8.9737e-11	16.3308	up	Immunity_high vs Immunity_low
LAP3	51056	1.24847	9.5574	12.7415	5.79478e-30	3.34473e-28	57.2373	up	Immunity_high vs Immunity_low
LAPTM4B	55353	-0.825081	10.714	-5.30938	2.15788e-07	1.80561e-06	5.97269	down	Immunity_high vs Immunity_low
LAPTM5	7805	1.60616	9.25537	16.6096	2.81964e-44	3.70312e-42	89.9801	up	Immunity_high vs Immunity_low
LAT	27040	1.01332	6.40405	14.7992	1.65982e-37	1.41899e-35	74.488	up	Immunity_high vs Immunity_low
LAT2	7462	1.09942	7.08956	14.7264	3.09409e-37	2.60824e-35	73.8692	up	Immunity_high vs Immunity_low
LBH	81606	0.895105	8.15532	7.98712	3.06042e-14	6.54093e-13	21.4004	up	Immunity_high vs Immunity_low
LCK	3932	0.608365	5.91964	12.4111	8.86771e-29	4.82638e-27	54.5296	up	Immunity_high vs Immunity_low
LCP1	3936	1.86442	10.9465	15.7217	6.00897e-41	6.56064e-39	82.3623	up	Immunity_high vs Immunity_low
LDB2	9079	0.67963	7.653	6.01688	5.22297e-09	5.86137e-08	9.58781	up	Immunity_high vs Immunity_low
LEF1	51176	1.10224	7.16815	11.8142	1.15807e-26	5.45167e-25	49.6955	up	Immunity_high vs Immunity_low
LEMD1	93273	-0.632687	6.2967	-3.34237	0.000936981	0.00343692	-2.01069	down	Immunity_high vs Immunity_low
LFNG	3955	1.01875	8.39951	7.00685	1.63776e-11	2.61984e-10	15.2253	up	Immunity_high vs Immunity_low
LGALS2	3957	0.770667	5.99398	11.4111	2.96538e-25	1.30765e-23	46.4794	up	Immunity_high vs Immunity_low
LGALS3BP	3959	0.981356	9.26881	6.21755	1.70793e-09	2.0747e-08	10.678	up	Immunity_high vs Immunity_low
LGALS7	3963	-0.664515	6.48202	-2.73581	0.00659701	0.0191211	-3.7984	down	Immunity_high vs Immunity_low
LGALS9	3965	1.2312	7.47373	12.4571	6.07522e-29	3.35693e-27	54.9049	up	Immunity_high vs Immunity_low
LGALS9C	654346	0.616871	6.15806	9.46566	9.40501e-19	2.79896e-17	31.655	up	Immunity_high vs Immunity_low
LGALSL	29094	-0.588661	6.6685	-6.17737	2.14081e-09	2.56444e-08	10.4575	down	Immunity_high vs Immunity_low
LGMN	5641	1.24092	9.0176	10.0657	1.06493e-20	3.54143e-19	36.0877	up	Immunity_high vs Immunity_low
LHFPL2	10184	0.720654	8.42725	8.30771	3.50847e-15	8.14181e-14	23.5346	up	Immunity_high vs Immunity_low
LHFPL6	10186	0.881083	7.84994	7.43228	1.14465e-12	2.07872e-11	17.8375	up	Immunity_high vs Immunity_low
LILRA5	353514	0.746038	6.87998	7.54704	5.48637e-13	1.02616e-11	18.5603	up	Immunity_high vs Immunity_low
LILRB3	11025	1.19801	7.38818	12.6746	1.0087e-29	5.74893e-28	56.6871	up	Immunity_high vs Immunity_low
LILRB4	11006	1.54956	7.1907	16.8502	3.52004e-45	4.94552e-43	92.0483	up	Immunity_high vs Immunity_low
LIMA1	51474	0.600303	7.67389	5.76539	2.04025e-08	2.06925e-07	8.26133	up	Immunity_high vs Immunity_low
LIME1	54923	1.23391	8.48708	9.94151	2.72276e-20	8.89142e-19	35.1587	up	Immunity_high vs Immunity_low
LINC01006	100506380	-0.600573	6.49298	-6.7617	7.22921e-11	1.06457e-09	13.77	down	Immunity_high vs Immunity_low
LIPA	3988	1.37944	9.79116	10.9086	1.59043e-23	6.36311e-22	42.532	up	Immunity_high vs Immunity_low
LMO2	4005	0.850442	7.32582	9.1295	1.08789e-17	3.00563e-16	29.2353	up	Immunity_high vs Immunity_low
LMTK3	114783	-0.604354	8.1901	-2.72035	0.0069056	0.0199105	-3.83956	down	Immunity_high vs Immunity_low
LOC100240735	100240735	0.685869	6.02324	15.0649	1.70317e-38	1.59939e-36	76.7504	up	Immunity_high vs Immunity_low
LPAR1	1902	0.976686	7.60858	8.10744	1.36579e-14	3.01138e-13	22.1951	up	Immunity_high vs Immunity_low
LPAR6	10161	1.05664	7.99825	10.3552	1.17061e-21	4.08003e-20	38.2736	up	Immunity_high vs Immunity_low
LPXN	9404	1.82044	9.36793	20.4093	1.76059e-58	9.11685e-56	122.489	up	Immunity_high vs Immunity_low
LRATD2	157638	-0.60777	8.89115	-4.60771	6.04957e-06	3.73441e-05	2.76021	down	Immunity_high vs Immunity_low
LRCH4	4034	0.735232	7.13892	10.2148	3.42725e-21	1.16539e-19	37.21	up	Immunity_high vs Immunity_low
LRFN4	78999	-0.647867	7.0118	-5.60845	4.67094e-08	4.43226e-07	7.45644	down	Immunity_high vs Immunity_low
LRP3	4037	-0.61863	9.26261	-5.75654	2.13883e-08	2.15716e-07	8.21544	down	Immunity_high vs Immunity_low
LRP5	4041	-0.659339	8.21502	-5.99077	6.02852e-09	6.66225e-08	9.44804	down	Immunity_high vs Immunity_low
LRPPRC	10128	-0.594044	8.25383	-7.63749	3.05725e-13	5.89464e-12	19.1353	down	Immunity_high vs Immunity_low
LRRC1	55227	-0.820417	8.27624	-8.15876	9.65921e-15	2.15861e-13	22.5364	down	Immunity_high vs Immunity_low
LRRC25	126364	0.667319	6.10167	10.6772	9.70723e-23	3.65767e-21	40.7397	up	Immunity_high vs Immunity_low
LRRC75B	388886	-0.805989	7.2051	-6.05505	4.23121e-09	4.82002e-08	9.79305	down	Immunity_high vs Immunity_low
LRRCC1	85444	-0.721734	8.05061	-5.67533	3.28871e-08	3.19939e-07	7.79725	down	Immunity_high vs Immunity_low
LRRFIP2	9209	-0.599569	7.49069	-6.018	5.19077e-09	5.83608e-08	9.59383	down	Immunity_high vs Immunity_low
LSM4	25804	-0.684535	9.90876	-7.3967	1.43565e-12	2.58388e-11	17.6149	down	Immunity_high vs Immunity_low
LSR	51599	-0.619614	7.36365	-5.60213	4.8277e-08	4.56905e-07	7.42439	down	Immunity_high vs Immunity_low
LST1	7940	1.53461	7.51215	16.9012	2.26596e-45	3.31196e-43	92.4861	up	Immunity_high vs Immunity_low
LTA	4049	1.37095	6.58259	15.6275	1.35193e-40	1.42456e-38	81.5564	up	Immunity_high vs Immunity_low
LTA4H	4048	0.705437	9.96282	9.45987	9.81366e-19	2.91578e-17	31.6129	up	Immunity_high vs Immunity_low
LTB	4050	2.4044	8.80572	12.3694	1.24942e-28	6.73945e-27	54.1893	up	Immunity_high vs Immunity_low
LTC4S	4056	0.607065	6.13902	7.62477	3.32031e-13	6.36796e-12	19.0541	up	Immunity_high vs Immunity_low
LUM	4060	1.29697	10.9964	6.09456	3.39922e-09	3.94414e-08	10.0065	up	Immunity_high vs Immunity_low
LXN	56925	0.819012	8.47804	7.32498	2.26144e-12	3.97082e-11	17.1685	up	Immunity_high vs Immunity_low
LY86	9450	1.40763	8.11456	14.395	5.23765e-36	4.12727e-34	71.0584	up	Immunity_high vs Immunity_low
LY9	4063	1.20689	5.93615	17.5776	6.53682e-48	1.18473e-45	98.2994	up	Immunity_high vs Immunity_low
LY96	23643	1.66838	9.35888	18.6858	4.57732e-52	1.20231e-49	107.809	up	Immunity_high vs Immunity_low
LYL1	4066	1.54811	8.41861	17.632	4.08136e-48	7.47177e-46	98.7676	up	Immunity_high vs Immunity_low
LYN	4067	0.86595	9.67557	7.76104	1.36569e-13	2.74714e-12	19.9281	up	Immunity_high vs Immunity_low
LYSMD2	256586	0.923867	8.41005	9.5615	4.64047e-19	1.40407e-17	32.3535	up	Immunity_high vs Immunity_low
LYVE1	10894	0.953685	6.09797	7.81682	9.46597e-14	1.94514e-12	20.2888	up	Immunity_high vs Immunity_low
LYZ	4069	2.9625	9.48829	14.2741	1.46606e-35	1.12114e-33	70.0358	up	Immunity_high vs Immunity_low
LZTS3	9762	-0.845772	6.86751	-6.0932	3.42484e-09	3.97133e-08	9.99919	down	Immunity_high vs Immunity_low
MACROD1	28992	-0.70773	6.9097	-7.36313	1.77646e-12	3.16895e-11	17.4056	down	Immunity_high vs Immunity_low
MACROH2A1	9555	0.655076	7.9902	7.40821	1.33427e-12	2.41099e-11	17.6868	up	Immunity_high vs Immunity_low
MAF	4094	1.20977	7.50716	11.6777	3.48768e-26	1.58821e-24	48.6019	up	Immunity_high vs Immunity_low
MAFB	9935	0.980074	9.16756	8.8937	5.88813e-17	1.54886e-15	27.5674	up	Immunity_high vs Immunity_low
MAFF	23764	0.890454	7.03232	16.7382	9.27316e-45	1.27323e-42	91.0855	up	Immunity_high vs Immunity_low
MAL	4118	1.62564	6.84197	10.9461	1.18406e-23	4.76886e-22	42.8244	up	Immunity_high vs Immunity_low
MAL2	114569	-0.952078	9.24671	-5.32907	1.95492e-07	1.65102e-06	6.06832	down	Immunity_high vs Immunity_low
MAN1C1	57134	1.17074	6.75662	10.7028	7.9566e-23	3.02317e-21	40.9367	up	Immunity_high vs Immunity_low
MAN2A1	4124	0.712813	7.87955	8.35824	2.48211e-15	5.82717e-14	23.8758	up	Immunity_high vs Immunity_low
MAN2B1	4125	0.608199	7.92233	7.93331	4.37976e-14	9.23009e-13	21.0475	up	Immunity_high vs Immunity_low
MAP3K8	1326	0.633928	7.04941	6.36648	7.32375e-10	9.41388e-09	11.5048	up	Immunity_high vs Immunity_low
MAP4K1	11184	1.92801	7.6105	17.0859	4.5884e-46	7.23131e-44	94.0736	up	Immunity_high vs Immunity_low
MAP7	9053	-0.910438	8.0037	-7.68338	2.26867e-13	4.45475e-12	19.4288	down	Immunity_high vs Immunity_low
MARCHF1	55016	0.855285	5.98269	14.28	1.39458e-35	1.07099e-33	70.0855	up	Immunity_high vs Immunity_low
MARCKSL1	65108	-0.646803	10.9541	-5.32105	2.03522e-07	1.71087e-06	6.02934	down	Immunity_high vs Immunity_low
MARVELD2	153562	-0.67184	6.61519	-7.33097	2.17745e-12	3.83518e-11	17.2057	down	Immunity_high vs Immunity_low
MARVELD3	91862	-0.841256	7.3534	-7.5958	4.00524e-13	7.60912e-12	18.8697	down	Immunity_high vs Immunity_low
MATK	4145	1.0982	7.00962	8.59229	4.91745e-16	1.20928e-14	25.4725	up	Immunity_high vs Immunity_low
MB	4151	-0.886901	7.60419	-5.07728	6.76852e-07	5.10924e-06	4.86764	down	Immunity_high vs Immunity_low
MBP	4155	0.823971	8.55537	7.474	8.76856e-13	1.60203e-11	18.0994	up	Immunity_high vs Immunity_low
MCF2L-AS1	100289410	-0.907113	7.41512	-6.15676	2.4029e-09	2.85762e-08	10.3448	down	Immunity_high vs Immunity_low
MCM10	55388	-0.821303	7.61787	-5.63318	4.10423e-08	3.92326e-07	7.58205	down	Immunity_high vs Immunity_low
MCM2	4171	-0.743242	8.1864	-5.96039	7.11972e-09	7.79214e-08	9.28597	down	Immunity_high vs Immunity_low
MCM3AP-AS1	114044	-0.586267	6.24318	-6.66942	1.25232e-10	1.77876e-09	13.232	down	Immunity_high vs Immunity_low
MCM4	4173	-1.01801	9.10491	-7.5991	3.92079e-13	7.45649e-12	18.8907	down	Immunity_high vs Immunity_low
MCM7	4176	-0.673003	10.7271	-5.70413	2.82482e-08	2.79112e-07	7.94501	down	Immunity_high vs Immunity_low
MCOLN2	255231	1.22384	7.73028	11.0483	5.29584e-24	2.17646e-22	43.6218	up	Immunity_high vs Immunity_low
MCUB	55013	0.743322	9.40343	7.86816	6.74575e-14	1.40367e-12	20.6223	up	Immunity_high vs Immunity_low
MEF2C	4208	0.646442	6.78718	7.22143	4.33571e-12	7.37843e-11	16.5294	up	Immunity_high vs Immunity_low
MEI1	150365	0.710432	5.85555	12.8063	3.38417e-30	1.97854e-28	57.7713	up	Immunity_high vs Immunity_low
MELK	9833	-0.711463	8.47036	-4.45325	1.19861e-05	6.92745e-05	2.10556	down	Immunity_high vs Immunity_low
MEOX1	4222	0.853557	6.1907	8.33992	2.81448e-15	6.56495e-14	23.7519	up	Immunity_high vs Immunity_low
MERTK	10461	0.630337	7.73051	6.34564	8.25214e-10	1.05325e-08	11.3882	up	Immunity_high vs Immunity_low
MESP1	55897	-0.667429	7.35878	-3.76039	0.000204287	0.000881336	-0.586472	down	Immunity_high vs Immunity_low
MFAP4	4239	1.45838	8.11937	7.63275	3.15289e-13	6.05969e-12	19.105	up	Immunity_high vs Immunity_low
MFAP5	8076	0.696959	8.42022	3.44787	0.000646674	0.0024763	-1.66581	up	Immunity_high vs Immunity_low
MFGE8	4240	-0.729906	11.4222	-3.88161	0.000127884	0.000581331	-0.144914	down	Immunity_high vs Immunity_low
MFSD1	64747	0.608711	9.79402	8.03057	2.28878e-14	4.91529e-13	21.6866	up	Immunity_high vs Immunity_low
MGAT1	4245	0.791399	9.93851	9.33971	2.36643e-18	6.82949e-17	30.7428	up	Immunity_high vs Immunity_low
MGAT2	4247	0.594031	7.02856	6.99547	1.756e-11	2.79174e-10	15.1569	up	Immunity_high vs Immunity_low
MGAT4A	11320	0.751466	7.48218	8.84828	8.12855e-17	2.11974e-15	27.2491	up	Immunity_high vs Immunity_low
MGP	4256	-0.739623	12.4585	-2.9856	0.00306563	0.00981214	-3.10283	down	Immunity_high vs Immunity_low
MIA	8190	-0.656741	6.80823	-3.04141	0.00256473	0.00838895	-2.9396	down	Immunity_high vs Immunity_low
MICA	100507436	0.853359	6.73517	9.10026	1.34306e-17	3.67142e-16	29.0272	up	Immunity_high vs Immunity_low
MICAL1	64780	0.73469	7.77748	7.60753	3.71268e-13	7.083e-12	18.9443	up	Immunity_high vs Immunity_low
MICOS10	440574	0.596781	10.4537	4.18216	3.80438e-05	0.000196105	1.00411	up	Immunity_high vs Immunity_low
MIF	4282	-0.786309	12.5265	-9.79242	8.33703e-20	2.66491e-18	34.0514	down	Immunity_high vs Immunity_low
MLF2	8079	-0.620198	9.25253	-6.23979	1.50645e-09	1.8523e-08	10.8005	down	Immunity_high vs Immunity_low
MLLT11	10962	-0.628407	7.94395	-3.43744	0.000671075	0.00255785	-1.70032	down	Immunity_high vs Immunity_low
MMD	23531	0.623575	7.91766	6.53389	2.77956e-10	3.80489e-09	12.4519	up	Immunity_high vs Immunity_low
MME	4311	0.629525	6.74968	4.13346	4.65293e-05	0.000234119	0.812739	up	Immunity_high vs Immunity_low
MMP12	4321	0.774331	7.21067	3.07657	0.00228904	0.00759724	-2.83532	up	Immunity_high vs Immunity_low
MMP25	64386	0.611839	6.28614	7.32084	2.32133e-12	4.0649e-11	17.1428	up	Immunity_high vs Immunity_low
MMP9	4318	1.65011	10.1352	8.03504	2.22126e-14	4.78125e-13	21.7161	up	Immunity_high vs Immunity_low
MNDA	4332	1.24108	6.50714	15.0545	1.86277e-38	1.74025e-36	76.6614	up	Immunity_high vs Immunity_low
MOB3A	126308	0.657968	6.93303	10.8818	1.96265e-23	7.78361e-22	42.3236	up	Immunity_high vs Immunity_low
MOCOS	55034	-0.822228	7.68117	-4.8887	1.6641e-06	1.16045e-05	4.00036	down	Immunity_high vs Immunity_low
MOXD1	26002	0.652219	7.57622	3.99347	8.2133e-05	0.000390191	0.27377	up	Immunity_high vs Immunity_low
MPEG1	219972	0.82333	6.0065	15.1439	8.65098e-39	8.20892e-37	77.4235	up	Immunity_high vs Immunity_low
MPP1	4354	0.9407	7.18774	12.0284	2.03354e-27	1.00975e-25	51.4212	up	Immunity_high vs Immunity_low
MPZL2	10205	-0.868877	9.2583	-6.74087	8.1875e-11	1.19573e-09	13.6481	down	Immunity_high vs Immunity_low
MR1	3140	0.767101	7.11909	9.64408	2.51746e-19	7.74641e-18	32.9583	up	Immunity_high vs Immunity_low
MS4A4A	51338	0.86258	6.33283	9.36326	1.99232e-18	5.78668e-17	30.9129	up	Immunity_high vs Immunity_low
MS4A6A	64231	2.02204	8.86657	16.0701	2.97791e-42	3.37323e-40	85.3485	up	Immunity_high vs Immunity_low
MS4A7	58475	1.13281	7.56207	9.42416	1.27557e-18	3.74085e-17	31.3537	up	Immunity_high vs Immunity_low
MSC	9242	0.900129	6.43102	12.1401	8.17671e-28	4.16277e-26	52.3252	up	Immunity_high vs Immunity_low
MSH6	2956	-0.641818	9.51671	-7.26608	3.27722e-12	5.64067e-11	16.8042	down	Immunity_high vs Immunity_low
MSLN	10232	-1.06647	7.74596	-2.76507	0.00604711	0.0177544	-3.71991	down	Immunity_high vs Immunity_low
MSR1	4481	0.71599	6.21572	6.78791	6.17887e-11	9.17165e-10	13.9238	up	Immunity_high vs Immunity_low
MT1G	4495	-0.777341	9.092	-3.29796	0.00109225	0.00394657	-2.15289	down	Immunity_high vs Immunity_low
MTA1	9112	-0.586411	8.33649	-5.42931	1.17717e-07	1.03619e-06	6.55969	down	Immunity_high vs Immunity_low
MTA3	57504	-0.726537	8.15769	-8.71256	2.1188e-16	5.38134e-15	26.3033	down	Immunity_high vs Immunity_low
MTFR1	9650	-0.628827	8.14482	-5.32476	1.99766e-07	1.68173e-06	6.04738	down	Immunity_high vs Immunity_low
MVP	9961	0.734776	8.54882	7.65948	2.65034e-13	5.15948e-12	19.2758	up	Immunity_high vs Immunity_low
MX2	4600	0.892176	8.53524	6.31645	9.7491e-10	1.23131e-08	11.2254	up	Immunity_high vs Immunity_low
MYBPC1	4604	-0.93254	6.53521	-3.45755	0.000624751	0.00240301	-1.63367	down	Immunity_high vs Immunity_low
MYCBP2	23077	0.63981	8.43164	7.00177	1.68957e-11	2.69557e-10	15.1947	up	Immunity_high vs Immunity_low
MYO10	4651	-0.730574	6.85069	-7.28232	2.95906e-12	5.13698e-11	16.9045	down	Immunity_high vs Immunity_low
MYO1F	4542	0.910853	6.33793	15.287	2.52996e-39	2.47854e-37	78.6453	up	Immunity_high vs Immunity_low
MYO1G	64005	1.21574	6.90976	16.6298	2.36643e-44	3.1306e-42	90.1543	up	Immunity_high vs Immunity_low
MYO5A	4644	0.636054	7.51633	8.71248	2.11999e-16	5.38134e-15	26.3028	up	Immunity_high vs Immunity_low
MYO6	4646	-0.716341	7.45676	-7.04387	1.3047e-11	2.11129e-10	15.4483	down	Immunity_high vs Immunity_low
MZB1	51237	2.12765	8.26989	9.09044	1.4414e-17	3.93432e-16	28.9574	up	Immunity_high vs Immunity_low
NAAA	27163	0.605883	7.39695	6.11143	3.09475e-09	3.614e-08	10.098	up	Immunity_high vs Immunity_low
NAALADL1	10004	0.731057	6.13482	13.5854	4.9992e-33	3.39346e-31	64.2429	up	Immunity_high vs Immunity_low
NABP1	64859	0.964699	8.11376	12.436	7.22828e-29	3.95786e-27	54.7325	up	Immunity_high vs Immunity_low
NAPSA	9476	0.621905	5.87442	10.1917	4.08987e-21	1.38035e-19	37.035	up	Immunity_high vs Immunity_low
NAPSB	256236	1.93881	7.63321	14.0414	1.05881e-34	7.61506e-33	68.0717	up	Immunity_high vs Immunity_low
NAV2	89797	-0.738171	8.30429	-4.54572	7.97745e-06	4.81303e-05	2.49514	down	Immunity_high vs Immunity_low
NAXE	128240	-0.631936	9.99715	-6.98973	1.81881e-11	2.884e-10	15.1224	down	Immunity_high vs Immunity_low
NCEH1	57552	0.724234	7.06186	6.21428	1.73961e-09	2.11035e-08	10.66	up	Immunity_high vs Immunity_low
NCF1	653361	1.361	6.67589	16.7716	6.94841e-45	9.68715e-43	91.3724	up	Immunity_high vs Immunity_low
NCF4	4689	1.4817	6.93465	22.9974	6.22031e-68	8.67207e-65	144.11	up	Immunity_high vs Immunity_low
NCKAP1L	3071	1.25093	6.80672	18.9765	3.7495e-53	1.07866e-50	110.296	up	Immunity_high vs Immunity_low
NCR3	259197	0.702905	5.68176	11.5602	8.98168e-26	4.01936e-24	47.6638	up	Immunity_high vs Immunity_low
NCS1	23413	-0.601193	7.18881	-6.22978	1.59401e-09	1.94938e-08	10.7453	down	Immunity_high vs Immunity_low
NDN	4692	0.946934	8.43836	6.18056	2.10282e-09	2.52394e-08	10.475	up	Immunity_high vs Immunity_low
NDRG1	10397	-0.780497	9.4511	-4.61948	5.7382e-06	3.55727e-05	2.81087	down	Immunity_high vs Immunity_low
NDRG4	65009	-0.602329	7.00706	-4.19321	3.63348e-05	0.000188529	1.04783	down	Immunity_high vs Immunity_low
NDUFA4L2	56901	-0.611445	7.5202	-2.97044	0.00321645	0.0102218	-3.1467	down	Immunity_high vs Immunity_low
NECAP2	55707	0.673477	8.85394	10.4537	5.48568e-22	1.95714e-20	39.0242	up	Immunity_high vs Immunity_low
NECTIN4	81607	-0.834841	6.54713	-7.61319	3.57894e-13	6.83505e-12	18.9804	down	Immunity_high vs Immunity_low
NEDD4L	23327	-0.674565	6.78132	-6.27491	1.23476e-09	1.53175e-08	10.9946	down	Immunity_high vs Immunity_low
NEK2	4751	-0.791362	7.25939	-5.3082	2.17067e-07	1.81547e-06	5.96697	down	Immunity_high vs Immunity_low
NELL2	4753	0.939729	6.81796	5.3886	1.44767e-07	1.25479e-06	6.35925	up	Immunity_high vs Immunity_low
NFIB	4781	-0.959076	11.0299	-5.85716	1.24713e-08	1.3149e-07	8.74018	down	Immunity_high vs Immunity_low
NFIX	4784	-1.06325	10.5212	-6.28189	1.1868e-09	1.47832e-08	11.0333	down	Immunity_high vs Immunity_low
NFS1	9054	1.69357	8.06121	13.3096	5.07958e-32	3.27624e-30	61.9404	up	Immunity_high vs Immunity_low
NIN	51199	0.610672	7.55617	9.17601	7.77491e-18	2.16788e-16	29.5672	up	Immunity_high vs Immunity_low
NKG7	4818	2.45766	8.07654	16.9224	1.88655e-45	2.80261e-43	92.6683	up	Immunity_high vs Immunity_low
NLRC5	84166	0.852458	6.36476	11.9453	3.99911e-27	1.92254e-25	50.7503	up	Immunity_high vs Immunity_low
NLRP3	114548	0.993652	6.46277	17.1505	2.62485e-46	4.20997e-44	94.6288	up	Immunity_high vs Immunity_low
NME1	4830	-0.611016	11.4419	-5.84837	1.30765e-08	1.37398e-07	8.69406	down	Immunity_high vs Immunity_low
NMU	10874	-0.682117	6.38604	-4.02406	7.26411e-05	0.000350332	0.390098	down	Immunity_high vs Immunity_low
NNMT	4837	0.673615	8.52283	5.58616	5.2469e-08	4.94513e-07	7.34355	up	Immunity_high vs Immunity_low
NPL	80896	1.36919	7.69539	14.2046	2.64756e-35	1.97466e-33	69.4486	up	Immunity_high vs Immunity_low
NR1H3	10062	0.81426	8.71084	7.86023	7.10885e-14	1.47247e-12	20.5706	up	Immunity_high vs Immunity_low
NR2F6	2063	-0.774915	8.37323	-8.04297	2.1064e-14	4.54481e-13	21.7684	down	Immunity_high vs Immunity_low
NRP1	8829	0.660404	7.97139	5.40198	1.35271e-07	1.17868e-06	6.42499	up	Immunity_high vs Immunity_low
NRROS	375387	1.31156	6.79716	18.7945	1.79507e-52	4.85581e-50	108.739	up	Immunity_high vs Immunity_low
NT5DC2	64943	-0.632966	8.4343	-5.56244	5.93546e-08	5.5594e-07	7.22385	down	Immunity_high vs Immunity_low
NUAK2	81788	0.694859	6.14727	10.2018	3.78659e-21	1.28038e-19	37.1113	up	Immunity_high vs Immunity_low
NUB1	51667	0.593078	9.40643	7.07804	1.05697e-11	1.72893e-10	15.6548	up	Immunity_high vs Immunity_low
NUP62	23636	0.81348	6.6747	7.32155	2.31099e-12	4.05071e-11	17.1472	up	Immunity_high vs Immunity_low
NUPR2	389493	-0.8943	7.517	-4.01797	7.44434e-05	0.000357407	0.366877	down	Immunity_high vs Immunity_low
NUSAP1	51203	-0.58813	8.71411	-4.68099	4.34559e-06	2.76932e-05	3.07756	down	Immunity_high vs Immunity_low
OAF	220323	0.795234	8.89299	6.85683	4.08089e-11	6.20487e-10	14.3302	up	Immunity_high vs Immunity_low
OAS1	4938	0.66254	7.35072	4.63688	5.30578e-06	3.31364e-05	2.88601	up	Immunity_high vs Immunity_low
OAS2	4939	0.680738	6.62877	6.16269	2.32442e-09	2.76974e-08	10.3772	up	Immunity_high vs Immunity_low
OASL	8638	0.71724	7.15862	4.50377	9.60358e-06	5.66955e-05	2.31754	up	Immunity_high vs Immunity_low
OGN	4969	0.63551	5.9503	4.35544	1.83036e-05	0.000102009	1.70116	up	Immunity_high vs Immunity_low
OLFML1	283298	0.774274	6.75275	7.93026	4.46921e-14	9.40767e-13	21.0276	up	Immunity_high vs Immunity_low
OLFML2B	25903	0.70243	8.3853	4.97888	1.08587e-06	7.86272e-06	4.41165	up	Immunity_high vs Immunity_low
OPLAH	26873	-0.6882	8.19994	-4.63911	5.25268e-06	3.28501e-05	2.89566	down	Immunity_high vs Immunity_low
OSR1	130497	-0.762873	7.14236	-3.27154	0.00119565	0.00428514	-2.23665	down	Immunity_high vs Immunity_low
OSTF1	26578	0.727628	9.46035	9.5334	5.71054e-19	1.71354e-17	32.1483	up	Immunity_high vs Immunity_low
OTX1	5013	-0.695195	5.88342	-7.0739	1.08433e-11	1.7689e-10	15.6297	down	Immunity_high vs Immunity_low
OVOL2	58495	-1.34357	8.49282	-10.6866	9.02185e-23	3.4065e-21	40.8122	down	Immunity_high vs Immunity_low
P2RY10	27334	1.381	6.11457	18.6592	5.75688e-52	1.49054e-49	107.581	up	Immunity_high vs Immunity_low
P2RY8	286530	1.79254	6.82126	16.5181	6.21509e-44	7.93256e-42	89.1945	up	Immunity_high vs Immunity_low
PACSIN3	29763	-0.90974	7.3211	-8.59602	4.79118e-16	1.17983e-14	25.4982	down	Immunity_high vs Immunity_low
PAFAH1B3	5050	-0.747077	10.1372	-7.27007	3.19599e-12	5.51225e-11	16.8288	down	Immunity_high vs Immunity_low
PAG1	55824	1.13662	6.83688	17.0366	7.02531e-46	1.07904e-43	93.6502	up	Immunity_high vs Immunity_low
PAICS	10606	-0.63707	10.2312	-6.39787	6.11547e-10	7.9796e-09	11.681	down	Immunity_high vs Immunity_low
PAK4	10298	-0.714055	7.94105	-7.45766	9.73465e-13	1.77317e-11	17.9967	down	Immunity_high vs Immunity_low
PANK1	53354	-0.67211	7.05471	-6.20445	1.83865e-09	2.22158e-08	10.606	down	Immunity_high vs Immunity_low
PAPLN	89932	0.786036	6.38126	8.31482	3.34202e-15	7.76549e-14	23.5825	up	Immunity_high vs Immunity_low
PAQR4	124222	-0.799367	8.91286	-6.66205	1.3082e-10	1.85523e-09	13.1893	down	Immunity_high vs Immunity_low
PARM1	25849	0.9766	7.40298	8.23354	5.81737e-15	1.32455e-13	23.0361	up	Immunity_high vs Immunity_low
PARP14	54625	0.839638	8.1318	7.87195	6.57877e-14	1.37366e-12	20.6469	up	Immunity_high vs Immunity_low
PARP8	79668	0.629044	7.34347	6.9324	2.58084e-11	4.01159e-10	14.7793	up	Immunity_high vs Immunity_low
PARP9	83666	0.778448	8.84257	7.56048	5.03123e-13	9.44108e-12	18.6455	up	Immunity_high vs Immunity_low
PARVG	64098	1.5487	7.62883	19.6206	1.48669e-55	5.18168e-53	115.792	up	Immunity_high vs Immunity_low
PASK	23178	0.586781	6.8506	6.66001	1.32406e-10	1.87625e-09	13.1775	up	Immunity_high vs Immunity_low
PATL2	197135	0.685501	5.89626	11.0807	4.0988e-24	1.69604e-22	43.8758	up	Immunity_high vs Immunity_low
PBK	55872	-0.651119	6.74921	-5.74719	2.248e-08	2.26223e-07	8.16704	down	Immunity_high vs Immunity_low
PBX1	5087	-0.655347	7.0302	-6.36887	7.22418e-10	9.29908e-09	11.5182	down	Immunity_high vs Immunity_low
PCDHB2	56133	-0.609542	7.4167	-2.75485	0.00623426	0.0182212	-3.74741	down	Immunity_high vs Immunity_low
PCED1B	91523	1.45927	8.18228	12.5881	2.06224e-29	1.16436e-27	55.9773	up	Immunity_high vs Immunity_low
PCOLCE	5118	0.959649	8.85521	5.9543	7.36065e-09	8.03157e-08	9.25356	up	Immunity_high vs Immunity_low
PCSK1N	27344	-0.726119	6.46986	-4.42066	1.38131e-05	7.90489e-05	1.96996	down	Immunity_high vs Immunity_low
PDCD1	5133	0.811604	5.86206	12.3414	1.57307e-28	8.36081e-27	53.9607	up	Immunity_high vs Immunity_low
PDE9A	5152	-0.725697	7.33893	-4.52872	8.60152e-06	5.14502e-05	2.42302	down	Immunity_high vs Immunity_low
PDGFRA	5156	0.706734	8.0543	6.0599	4.11922e-09	4.70131e-08	9.8192	up	Immunity_high vs Immunity_low
PDGFRB	5159	0.673173	9.8274	4.90715	1.52572e-06	1.07179e-05	4.08396	up	Immunity_high vs Immunity_low
PDK4	5166	1.0139	6.7931	6.63394	1.54472e-10	2.17533e-09	13.0266	up	Immunity_high vs Immunity_low
PDPN	10630	0.906035	7.77374	6.96389	2.13011e-11	3.35706e-10	14.9675	up	Immunity_high vs Immunity_low
PECAM1	5175	1.42632	8.11195	16.6724	1.63771e-44	2.21506e-42	90.5201	up	Immunity_high vs Immunity_low
PEG10	23089	-0.680333	6.58663	-3.79877	0.000176362	0.000773195	-0.448069	down	Immunity_high vs Immunity_low
PEG3	5178	-0.718202	7.24632	-2.41185	0.0164781	0.0423555	-4.61418	down	Immunity_high vs Immunity_low
PERP	64065	-0.807864	7.19344	-5.30601	2.19455e-07	1.8336e-06	5.95638	down	Immunity_high vs Immunity_low
PFN2	5217	-0.779932	9.03934	-4.7722	2.86248e-06	1.8948e-05	3.47855	down	Immunity_high vs Immunity_low
PGAP2	27315	-0.593137	7.99985	-6.498	3.42646e-10	4.63788e-09	12.2473	down	Immunity_high vs Immunity_low
PGM5	5239	0.753392	6.46502	6.00024	5.72316e-09	6.3519e-08	9.49869	up	Immunity_high vs Immunity_low
PGRMC1	10857	-0.608789	10.8469	-6.20628	1.81985e-09	2.20034e-08	10.616	down	Immunity_high vs Immunity_low
PHF11	51131	0.678973	9.93872	8.97486	3.30165e-17	8.83888e-16	28.1387	up	Immunity_high vs Immunity_low
PHGDH	26227	-1.21196	11.1565	-6.19582	1.93016e-09	2.32595e-08	10.5586	down	Immunity_high vs Immunity_low
PI16	221476	0.920076	6.29403	5.53152	6.96621e-08	6.43315e-07	7.06846	up	Immunity_high vs Immunity_low
PIK3AP1	118788	0.628161	5.86362	9.67949	1.93526e-19	6.01623e-18	33.2184	up	Immunity_high vs Immunity_low
PIK3CD	5293	0.928204	6.7982	10.8885	1.862e-23	7.41691e-22	42.3757	up	Immunity_high vs Immunity_low
PIK3IP1	113791	1.20355	8.19183	13.2861	6.18625e-32	3.93402e-30	61.7447	up	Immunity_high vs Immunity_low
PIK3R2	5296	-0.611742	10.2679	-6.20989	1.78316e-09	2.15885e-08	10.6359	down	Immunity_high vs Immunity_low
PILRA	29992	0.697411	6.23963	10.8474	2.56951e-23	1.00583e-21	42.0566	up	Immunity_high vs Immunity_low
PIM2	11040	1.75465	8.25519	11.6089	6.0711e-26	2.73713e-24	48.0522	up	Immunity_high vs Immunity_low
PIMREG	54478	-0.755859	7.00657	-6.47476	3.92176e-10	5.26113e-09	12.1153	down	Immunity_high vs Immunity_low
PIP4K2A	5305	1.20852	9.84472	14.4329	3.79031e-36	3.01296e-34	71.3797	up	Immunity_high vs Immunity_low
PITPNM2	57605	0.650933	6.2806	12.4018	9.57345e-29	5.19489e-27	54.4536	up	Immunity_high vs Immunity_low
PITX1	5307	-1.27218	9.30765	-5.5114	7.7288e-08	7.06388e-07	6.96768	down	Immunity_high vs Immunity_low
PKP1	5317	-1.21551	6.97042	-5.76096	2.08904e-08	2.11164e-07	8.23834	down	Immunity_high vs Immunity_low
PLA1A	51365	0.799923	5.97864	11.9469	3.94703e-27	1.90762e-25	50.7633	up	Immunity_high vs Immunity_low
PLA2G2A	5320	0.869315	6.24378	4.47241	1.10222e-05	6.43165e-05	2.18573	up	Immunity_high vs Immunity_low
PLA2G4C	8605	0.825142	7.68602	8.17882	8.43318e-15	1.89867e-13	22.6702	up	Immunity_high vs Immunity_low
PLA2G7	7941	1.39798	7.74158	9.68318	1.88278e-19	5.86315e-18	33.2456	up	Immunity_high vs Immunity_low
PLAAT1	57110	-0.716232	6.82652	-5.40896	1.30559e-07	1.14091e-06	6.45935	down	Immunity_high vs Immunity_low
PLAAT4	5920	1.80343	10.5867	9.18464	7.30418e-18	2.03977e-16	29.629	up	Immunity_high vs Immunity_low
PLAC8	51316	1.98746	6.86428	14.8538	1.04009e-37	9.10009e-36	74.9524	up	Immunity_high vs Immunity_low
PLAC9	219348	1.08491	7.4265	6.31145	1.00309e-09	1.26425e-08	11.1975	up	Immunity_high vs Immunity_low
PLBD1	79887	0.659362	9.04924	5.48214	8.98398e-08	8.08469e-07	6.82171	up	Immunity_high vs Immunity_low
PLCB2	5330	1.16424	6.9377	14.9033	6.80759e-38	6.07787e-36	75.3736	up	Immunity_high vs Immunity_low
PLCG2	5336	1.06355	8.93581	7.27315	3.13489e-12	5.42663e-11	16.8478	up	Immunity_high vs Immunity_low
PLCL2	23228	1.22886	7.5999	14.5069	2.01661e-36	1.63165e-34	72.0067	up	Immunity_high vs Immunity_low
PLEK	5341	2.20287	8.57675	23.4067	2.11045e-69	4.78123e-66	147.47	up	Immunity_high vs Immunity_low
PLEKHA2	59339	0.959008	8.37732	12.0204	2.17186e-27	1.06964e-25	51.3559	up	Immunity_high vs Immunity_low
PLEKHB1	58473	-0.838134	7.48215	-4.35365	1.84452e-05	0.000102735	1.6938	down	Immunity_high vs Immunity_low
PLEKHG6	55200	-0.607321	6.45619	-5.39019	1.4361e-07	1.24595e-06	6.36703	down	Immunity_high vs Immunity_low
PLEKHH3	79990	-0.614095	7.31829	-8.6975	2.35533e-16	5.95369e-15	26.1989	down	Immunity_high vs Immunity_low
PLEKHO1	51177	0.87352	8.09463	12.2823	2.55363e-28	1.33377e-26	53.48	up	Immunity_high vs Immunity_low
PLEKHO2	80301	0.984483	7.39779	13.2935	5.80978e-32	3.70762e-30	61.807	up	Immunity_high vs Immunity_low
PLIN1	5346	0.585628	5.82538	4.96906	1.1379e-06	8.1936e-06	4.36654	up	Immunity_high vs Immunity_low
PLIN4	729359	0.887203	6.87251	4.03853	6.8522e-05	0.000332146	0.445424	up	Immunity_high vs Immunity_low
PLPP1	8611	0.60273	8.05509	4.87177	1.80172e-06	1.2473e-05	3.92386	up	Immunity_high vs Immunity_low
PLPP2	8612	-0.968913	7.57259	-8.23775	5.65343e-15	1.28884e-13	23.0643	down	Immunity_high vs Immunity_low
PLPP3	8613	0.753197	8.81398	5.87163	1.15342e-08	1.22034e-07	8.81621	up	Immunity_high vs Immunity_low
PLTP	5360	0.904246	9.42952	7.54026	5.73141e-13	1.06926e-11	18.5174	up	Immunity_high vs Immunity_low
PLXNB1	5364	-0.921548	7.61024	-9.20393	6.35196e-18	1.78762e-16	29.767	down	Immunity_high vs Immunity_low
PMEPA1	56937	-0.58645	9.02711	-3.6852	0.000271531	0.00113759	-0.853975	down	Immunity_high vs Immunity_low
PNCK	139728	-0.626475	6.44454	-4.23449	3.05781e-05	0.000161621	1.21198	down	Immunity_high vs Immunity_low
PNMA8A	55228	-0.596639	6.57456	-4.50357	9.61211e-06	5.67274e-05	2.31669	down	Immunity_high vs Immunity_low
PNOC	5368	1.03982	5.89507	11.9272	4.63246e-27	2.21527e-25	50.6044	up	Immunity_high vs Immunity_low
PODN	127435	0.912723	8.35436	5.00252	9.69976e-07	7.10016e-06	4.52048	up	Immunity_high vs Immunity_low
PODXL2	50512	-0.88503	7.63288	-6.27277	1.2498e-09	1.54934e-08	10.9828	down	Immunity_high vs Immunity_low
POGK	57645	-0.602328	9.92854	-6.10269	3.24889e-09	3.78425e-08	10.0506	down	Immunity_high vs Immunity_low
POLD2	5425	-0.781665	11.0507	-8.75097	1.61701e-16	4.13937e-15	26.5701	down	Immunity_high vs Immunity_low
POLR3GL	84265	0.620622	9.07772	8.81084	1.05964e-16	2.75142e-15	26.9873	up	Immunity_high vs Immunity_low
POP5	51367	-0.806182	7.69856	-8.41362	1.69628e-15	4.02928e-14	24.2511	down	Immunity_high vs Immunity_low
POP7	10248	-0.746949	8.07534	-10.5241	3.18461e-22	1.16367e-20	39.5628	down	Immunity_high vs Immunity_low
POU2AF1	5450	1.40498	6.41862	10.7739	4.56807e-23	1.76153e-21	41.4865	up	Immunity_high vs Immunity_low
PPARG	5468	0.777282	7.48517	5.29979	2.26398e-07	1.88654e-06	5.92623	up	Immunity_high vs Immunity_low
PPFIA4	8497	-0.672356	6.01399	-7.47679	8.61325e-13	1.57683e-11	18.1169	down	Immunity_high vs Immunity_low
PPL	5493	-0.593934	6.6913	-5.67024	3.37803e-08	3.27432e-07	7.77121	down	Immunity_high vs Immunity_low
PPM1M	132160	0.98745	8.01178	14.8723	8.8791e-38	7.84999e-36	75.1096	up	Immunity_high vs Immunity_low
PPME1	51400	-0.676193	8.09228	-9.0609	1.78244e-17	4.84333e-16	28.7476	down	Immunity_high vs Immunity_low
PPP1R13L	10848	-0.785906	7.67581	-8.26079	4.83271e-15	1.10731e-13	23.2189	down	Immunity_high vs Immunity_low
PPP1R14C	81706	-0.716309	7.00847	-3.56839	0.000418609	0.0016737	-1.25972	down	Immunity_high vs Immunity_low
PPP1R16A	84988	-0.854944	7.75373	-7.88112	6.19141e-14	1.29576e-12	20.7067	down	Immunity_high vs Immunity_low
PPP1R16B	26051	1.6875	6.82576	14.8962	7.23268e-38	6.42574e-36	75.3134	up	Immunity_high vs Immunity_low
PPP1R18	170954	1.21772	8.8966	15.0742	1.57325e-38	1.48508e-36	76.8292	up	Immunity_high vs Immunity_low
PPP1R1B	84152	-1.04739	8.60309	-3.29863	0.00108974	0.00394118	-2.15075	down	Immunity_high vs Immunity_low
PPP3CC	5533	0.77074	7.51761	11.0886	3.85033e-24	1.59687e-22	43.9378	up	Immunity_high vs Immunity_low
PRC1	9055	-0.940391	9.28062	-6.78245	6.38453e-11	9.46143e-10	13.8917	down	Immunity_high vs Immunity_low
PRCP	5547	0.718755	8.68928	7.80811	1.0025e-13	2.05534e-12	20.2323	up	Immunity_high vs Immunity_low
PRDM1	639	1.33942	7.83331	14.1916	2.9575e-35	2.19679e-33	69.3387	up	Immunity_high vs Immunity_low
PRDM8	56978	0.750455	6.20997	11.6994	2.92856e-26	1.33696e-24	48.7752	up	Immunity_high vs Immunity_low
PRELID3A	10650	-0.729399	7.24998	-6.51684	3.07044e-10	4.18097e-09	12.3546	down	Immunity_high vs Immunity_low
PRF1	5551	1.60297	6.55133	18.3094	1.17492e-50	2.66178e-48	104.583	up	Immunity_high vs Immunity_low
PRKAR1A	5573	0.796072	8.45373	3.72272	0.000235725	0.00100383	-0.72111	up	Immunity_high vs Immunity_low
PRKCB	5579	2.38927	7.53438	20.2115	9.50613e-58	4.30723e-55	120.813	up	Immunity_high vs Immunity_low
PRKCH	5583	1.19701	8.38724	12.2845	2.50927e-28	1.3144e-26	53.4973	up	Immunity_high vs Immunity_low
PRKCQ-AS1	439949	0.70656	6.58619	4.98731	1.04307e-06	7.58918e-06	4.45042	up	Immunity_high vs Immunity_low
PRKCZ	5590	-0.599363	7.76947	-5.70299	2.84187e-08	2.80381e-07	7.93916	down	Immunity_high vs Immunity_low
PRKDC	5591	-0.593099	8.6676	-5.4186	1.24315e-07	1.09056e-06	6.50683	down	Immunity_high vs Immunity_low
PROM1	8842	-1.24671	9.93544	-3.85752	0.000140496	0.000631848	-0.233695	down	Immunity_high vs Immunity_low
PROM2	150696	-1.17466	8.8569	-6.22547	1.63327e-09	1.99068e-08	10.7216	down	Immunity_high vs Immunity_low
PRR36	80164	-1.23965	7.8433	-7.57802	4.49292e-13	8.45584e-12	18.7567	down	Immunity_high vs Immunity_low
PRR4	11272	-0.598702	6.71593	-3.08121	0.00225478	0.00750515	-2.82148	down	Immunity_high vs Immunity_low
PRR5L	79899	0.756973	6.6079	11.0385	5.71835e-24	2.34478e-22	43.5457	up	Immunity_high vs Immunity_low
PRRG2	5639	-0.912333	7.63397	-7.0593	1.18648e-11	1.93032e-10	15.5414	down	Immunity_high vs Immunity_low
PRRX1	5396	0.823122	9.44836	5.07928	6.70348e-07	5.0652e-06	4.87696	up	Immunity_high vs Immunity_low
PRSS8	5652	-1.18199	9.16062	-6.8151	5.24798e-11	7.88024e-10	14.0838	down	Immunity_high vs Immunity_low
PSMB10	5699	1.11102	10.7545	13.4902	1.11481e-32	7.42824e-31	63.4464	up	Immunity_high vs Immunity_low
PSMB8	5696	1.27462	7.76162	11.0263	6.29787e-24	2.57658e-22	43.4501	up	Immunity_high vs Immunity_low
PSMB9	5698	1.73223	8.48445	13.4844	1.16982e-32	7.76623e-31	63.3986	up	Immunity_high vs Immunity_low
PSME1	5720	0.908641	11.3771	11.2685	9.24493e-25	3.97993e-23	45.352	up	Immunity_high vs Immunity_low
PSME2	5721	0.865234	10.1579	9.3941	1.58987e-18	4.65506e-17	31.1359	up	Immunity_high vs Immunity_low
PSORS1C1	170679	0.602314	6.45742	6.58601	2.04835e-10	2.83824e-09	12.7505	up	Immunity_high vs Immunity_low
PSRC1	84722	-0.798782	7.29226	-7.62172	3.38659e-13	6.48137e-12	19.0347	down	Immunity_high vs Immunity_low
PSTPIP1	9051	1.21405	6.29719	19.2673	3.07898e-54	9.96491e-52	112.78	up	Immunity_high vs Immunity_low
PTCHD1	139411	-0.631443	6.22537	-4.34545	1.91049e-05	0.000106181	1.66027	down	Immunity_high vs Immunity_low
PTGDR	5729	0.649376	5.76684	15.6163	1.48947e-40	1.56042e-38	81.4601	up	Immunity_high vs Immunity_low
PTGDS	5730	2.963	8.03652	14.6881	4.2923e-37	3.58496e-35	73.5439	up	Immunity_high vs Immunity_low
PTGER2	5732	0.592758	5.94836	9.32057	2.721e-18	7.79073e-17	30.6048	up	Immunity_high vs Immunity_low
PTGER4	5734	1.2574	7.42916	16.8838	2.63329e-45	3.78775e-43	92.3368	up	Immunity_high vs Immunity_low
PTK2	5747	-0.716504	10.5884	-7.46482	9.2989e-13	1.69721e-11	18.0417	down	Immunity_high vs Immunity_low
PTK2B	2185	0.59517	6.33613	9.08927	1.45359e-17	3.96164e-16	28.949	up	Immunity_high vs Immunity_low
PTK7	5754	-0.658596	7.25061	-6.3748	6.98267e-10	9.02667e-09	11.5514	down	Immunity_high vs Immunity_low
PTPN22	26191	0.646009	5.82775	11.9619	3.49303e-27	1.70182e-25	50.8845	up	Immunity_high vs Immunity_low
PTPN6	5777	1.31312	8.59348	14.9893	3.25822e-38	2.98242e-36	76.1058	up	Immunity_high vs Immunity_low
PTPN7	5778	1.39911	6.61071	16.1443	1.56953e-42	1.81186e-40	85.9851	up	Immunity_high vs Immunity_low
PTPRC	5788	1.19192	6.02449	19.088	1.4371e-53	4.49069e-51	111.249	up	Immunity_high vs Immunity_low
PTPRCAP	5790	1.8961	6.9594	18.1393	5.10029e-50	1.07486e-47	103.124	up	Immunity_high vs Immunity_low
PTPRE	5791	1.09799	7.82559	14.1814	3.22431e-35	2.37551e-33	69.2529	up	Immunity_high vs Immunity_low
PTPRF	5792	-1.1646	9.48877	-9.03818	2.09814e-17	5.67562e-16	28.5865	down	Immunity_high vs Immunity_low
PTPRO	5800	0.915281	6.3208	14.3913	5.4029e-36	4.22079e-34	71.0276	up	Immunity_high vs Immunity_low
PUF60	22827	-0.714691	10.8587	-6.62578	1.62088e-10	2.27728e-09	12.9795	down	Immunity_high vs Immunity_low
PUS7	54517	-0.751244	8.10908	-7.29484	2.73485e-12	4.766e-11	16.9818	down	Immunity_high vs Immunity_low
PVRIG	79037	2.14813	6.7198	20.6913	1.59881e-59	9.65893e-57	124.873	up	Immunity_high vs Immunity_low
PYCARD	29108	0.825807	9.59477	5.55177	6.27328e-08	5.84861e-07	7.17013	up	Immunity_high vs Immunity_low
PYCR1	5831	-0.696302	7.98686	-6.12299	2.90176e-09	3.39958e-08	10.1608	down	Immunity_high vs Immunity_low
PYGB	5834	-0.656224	8.77497	-5.30252	2.23332e-07	1.86357e-06	5.93943	down	Immunity_high vs Immunity_low
PYHIN1	149628	1.50433	6.5549	20.3561	2.76872e-58	1.35622e-55	122.039	up	Immunity_high vs Immunity_low
RAB17	64284	-0.655552	7.63821	-3.99137	8.28265e-05	0.000392765	0.265808	down	Immunity_high vs Immunity_low
RAB25	57111	-1.44126	9.69328	-8.66561	2.94558e-16	7.41468e-15	25.9782	down	Immunity_high vs Immunity_low
RAB31	11031	0.775675	10.5005	6.27023	1.26793e-09	1.56967e-08	10.9687	up	Immunity_high vs Immunity_low
RAB33A	9363	0.753884	5.88668	14.2097	2.53492e-35	1.89847e-33	69.4918	up	Immunity_high vs Immunity_low
RAB37	326624	1.11177	6.11879	12.6811	9.55209e-30	5.47854e-28	56.7412	up	Immunity_high vs Immunity_low
RAB8B	51762	1.29964	8.03434	16.8706	2.95304e-45	4.18132e-43	92.2229	up	Immunity_high vs Immunity_low
RAC2	5880	2.52844	9.49132	23.1343	2.00173e-68	3.04621e-65	145.236	up	Immunity_high vs Immunity_low
RAC3	5881	-0.658187	6.74064	-7.00116	1.69588e-11	2.70326e-10	15.1911	down	Immunity_high vs Immunity_low
RAMP3	10268	0.815821	6.76131	9.37194	1.8698e-18	5.43954e-17	30.9756	up	Immunity_high vs Immunity_low
RAP1GAP	5909	-1.11091	7.98782	-6.06834	3.93132e-09	4.51242e-08	9.86472	down	Immunity_high vs Immunity_low
RAPGEF1	2889	0.648182	8.72264	9.56573	4.4976e-19	1.3694e-17	32.3844	up	Immunity_high vs Immunity_low
RARRES1	5918	0.699082	10.2755	2.55361	0.0111604	0.0302124	-4.26928	up	Immunity_high vs Immunity_low
RARRES2	5919	1.22613	9.48471	7.92911	4.50371e-14	9.46928e-13	21.02	up	Immunity_high vs Immunity_low
RASAL3	64926	1.96984	8.23634	16.8818	2.68031e-45	3.82503e-43	92.3192	up	Immunity_high vs Immunity_low
RASD2	23551	-1.08899	8.09134	-5.3589	1.68229e-07	1.43482e-06	6.21376	down	Immunity_high vs Immunity_low
RASEF	158158	-0.609403	6.86317	-3.93496	0.000103671	0.000481652	0.053418	down	Immunity_high vs Immunity_low
RASGRP2	10235	0.869394	5.83805	10.553	2.54604e-22	9.37894e-21	39.7845	up	Immunity_high vs Immunity_low
RASGRP3	25780	0.707263	7.50302	7.936	4.30207e-14	9.08749e-13	21.0651	up	Immunity_high vs Immunity_low
RASSF2	9770	1.32575	9.04977	12.5438	2.97201e-29	1.66249e-27	55.6146	up	Immunity_high vs Immunity_low
RASSF4	83937	0.840889	7.24527	8.95847	3.71161e-17	9.90709e-16	28.0231	up	Immunity_high vs Immunity_low
RASSF5	83593	1.60157	8.06604	16.4036	1.67211e-43	2.03392e-41	88.2108	up	Immunity_high vs Immunity_low
RASSF7	8045	-0.620688	9.14809	-6.11501	3.03373e-09	3.54731e-08	10.1174	down	Immunity_high vs Immunity_low
RAVER2	55225	-0.725763	7.24767	-6.11173	3.08963e-09	3.61034e-08	10.0996	down	Immunity_high vs Immunity_low
RBP1	5947	-0.732541	9.52876	-3.06673	0.00236329	0.00780329	-2.86461	down	Immunity_high vs Immunity_low
RBP5	83758	0.613803	6.34828	4.5139	9.18406e-06	5.44494e-05	2.36029	up	Immunity_high vs Immunity_low
RBPJ	3516	0.699754	7.58489	10.9979	7.87703e-24	3.20817e-22	43.2283	up	Immunity_high vs Immunity_low
RCBTB2	1102	0.738171	7.14479	10.3863	9.21629e-22	3.22463e-20	38.5104	up	Immunity_high vs Immunity_low
RCOR2	283248	-0.925442	6.90252	-6.62408	1.63719e-10	2.29663e-09	12.9697	down	Immunity_high vs Immunity_low
RCSD1	92241	0.703216	6.9585	10.8322	2.89622e-23	1.12884e-21	41.938	up	Immunity_high vs Immunity_low
RECQL4	9401	-0.686338	6.44551	-7.24302	3.78744e-12	6.48192e-11	16.6621	down	Immunity_high vs Immunity_low
RENBP	5973	1.05784	8.28491	10.311	1.64325e-21	5.69452e-20	37.9378	up	Immunity_high vs Immunity_low
RESF1	55196	0.754507	6.74628	11.2229	1.32822e-24	5.67752e-23	44.9928	up	Immunity_high vs Immunity_low
RFTN1	23180	1.35916	9.44702	13.6631	2.5969e-33	1.78281e-31	64.8934	up	Immunity_high vs Immunity_low
RGCC	28984	0.851268	9.83328	6.5288	2.86351e-10	3.90977e-09	12.4228	up	Immunity_high vs Immunity_low
RGL1	23179	0.975849	8.94972	10.6221	1.48972e-22	5.56693e-21	40.3154	up	Immunity_high vs Immunity_low
RGL4	266747	0.953562	6.04421	15.2498	3.48374e-39	3.37643e-37	78.3274	up	Immunity_high vs Immunity_low
RGMA	56963	-0.726075	8.36157	-4.24573	2.91688e-05	0.000155122	1.25691	down	Immunity_high vs Immunity_low
RGS1	5996	1.46676	8.84294	9.35307	2.14642e-18	6.21435e-17	30.8392	up	Immunity_high vs Immunity_low
RGS16	6004	0.587201	7.26791	5.57137	5.66636e-08	5.31558e-07	7.26889	up	Immunity_high vs Immunity_low
RGS18	64407	1.05746	6.25702	17.4004	3.02398e-47	5.21967e-45	96.7769	up	Immunity_high vs Immunity_low
RGS19	10287	0.736801	8.08031	11.139	2.58355e-24	1.07642e-22	44.3332	up	Immunity_high vs Immunity_low
RHBDF1	64285	-0.697662	9.34399	-7.03703	1.36079e-11	2.19226e-10	15.407	down	Immunity_high vs Immunity_low
RHOD	29984	-0.775081	8.02059	-7.35131	1.9146e-12	3.39866e-11	17.3321	down	Immunity_high vs Immunity_low
RHOG	391	0.924511	9.65941	16.3301	3.15466e-43	3.73694e-41	87.5798	up	Immunity_high vs Immunity_low
RHPN1-AS1	78998	-0.719635	6.64618	-7.76217	1.3556e-13	2.72988e-12	19.9354	down	Immunity_high vs Immunity_low
RHPN2	85415	-1.12437	9.23019	-6.27064	1.26504e-09	1.56717e-08	10.971	down	Immunity_high vs Immunity_low
RILPL2	196383	0.738918	6.93836	12.1785	5.97546e-28	3.0593e-26	52.6364	up	Immunity_high vs Immunity_low
RIPPLY3	53820	-0.789458	6.41595	-6.02818	4.90786e-09	5.54205e-08	9.64845	down	Immunity_high vs Immunity_low
RNASE1	6035	1.06392	9.62768	5.49296	8.49833e-08	7.68495e-07	6.87561	up	Immunity_high vs Immunity_low
RNASE6	6039	1.70402	7.39318	18.9074	6.79451e-53	1.86581e-50	109.705	up	Immunity_high vs Immunity_low
RNASET2	8635	0.597494	11.689	7.38011	1.59514e-12	2.853e-11	17.5114	up	Immunity_high vs Immunity_low
RNF126P1	376412	1.57347	6.51832	7.12891	7.7157e-12	1.27707e-10	15.9636	up	Immunity_high vs Immunity_low
RNF24	11237	-0.596967	8.28726	-5.94383	7.79329e-09	8.46796e-08	9.19793	down	Immunity_high vs Immunity_low
RNU11	26824	0.608642	6.64448	4.00104	7.96815e-05	0.000379639	0.302465	up	Immunity_high vs Immunity_low
ROPN1	54763	-1.52751	7.79911	-5.05151	7.66593e-07	5.72465e-06	4.74748	down	Immunity_high vs Immunity_low
ROPN1B	152015	-1.45494	7.53778	-5.13094	5.21493e-07	4.03912e-06	5.11943	down	Immunity_high vs Immunity_low
RPL36AL	6166	0.591618	11.0742	6.82461	4.95608e-11	7.45428e-10	14.1398	up	Immunity_high vs Immunity_low
RPRML	388394	-0.738346	5.94311	-4.05954	6.29364e-05	0.00030787	0.526045	down	Immunity_high vs Immunity_low
RPS27L	51065	0.599513	11.0141	6.43217	5.01846e-10	6.63418e-09	11.8742	up	Immunity_high vs Immunity_low
RTKN	6242	-1.04016	9.52036	-9.43916	1.14258e-18	3.37266e-17	31.4625	down	Immunity_high vs Immunity_low
RTP4	64108	0.672097	6.96582	5.30512	2.20436e-07	1.84025e-06	5.95206	up	Immunity_high vs Immunity_low
RUBCNL	80183	0.895368	6.61429	10.9067	1.61385e-23	6.4426e-22	42.5175	up	Immunity_high vs Immunity_low
RUNX2	860	0.637026	6.31489	7.39859	1.41848e-12	2.55552e-11	17.6267	up	Immunity_high vs Immunity_low
RUNX3	864	1.09017	8.81709	7.53158	6.06043e-13	1.12425e-11	18.4625	up	Immunity_high vs Immunity_low
RUSC1	23623	-0.666283	10.3492	-6.5039	3.31084e-10	4.49481e-09	12.2808	down	Immunity_high vs Immunity_low
S100A4	6275	1.3205	10.9801	8.96419	3.56311e-17	9.52476e-16	28.0634	up	Immunity_high vs Immunity_low
S100P	6286	-0.968373	9.53162	-2.61073	0.0094932	0.0262639	-4.12499	down	Immunity_high vs Immunity_low
S1PR1	1901	0.946056	6.43295	12.6165	1.6308e-29	9.23646e-28	56.2103	up	Immunity_high vs Immunity_low
S1PR4	8698	1.09514	6.07892	16.7445	8.78132e-45	1.21491e-42	91.1396	up	Immunity_high vs Immunity_low
SAMD3	154075	1.30993	6.25051	18.9078	6.76884e-53	1.86581e-50	109.709	up	Immunity_high vs Immunity_low
SAMSN1	64092	1.47284	6.71922	22.3202	1.74276e-65	1.85799e-62	138.513	up	Immunity_high vs Immunity_low
SASH3	54440	1.62227	7.25519	18.1138	6.35858e-50	1.32463e-47	102.904	up	Immunity_high vs Immunity_low
SBK1	388228	-1.04951	8.48911	-5.887	1.06134e-08	1.12754e-07	8.89719	down	Immunity_high vs Immunity_low
SCARA5	286133	0.744937	5.80548	7.5376	5.83035e-13	1.08379e-11	18.5005	up	Immunity_high vs Immunity_low
SCARNA9	619383	1.00349	6.48163	11.9188	4.9604e-27	2.35346e-25	50.5365	up	Immunity_high vs Immunity_low
SCG2	7857	0.627291	5.93057	5.5198	7.40087e-08	6.79156e-07	7.00974	up	Immunity_high vs Immunity_low
SCGB2A1	4246	-0.676253	7.06486	-2.4905	0.0133025	0.035179	-4.42517	down	Immunity_high vs Immunity_low
SCIMP	388325	1.10004	6.25337	19.7669	4.24549e-56	1.57031e-53	117.038	up	Immunity_high vs Immunity_low
SCNN1B	6338	-0.793977	6.55763	-5.00281	9.68634e-07	7.09601e-06	4.52182	down	Immunity_high vs Immunity_low
SCRG1	11341	-1.44994	7.31111	-4.40753	1.46224e-05	8.31814e-05	1.91556	down	Immunity_high vs Immunity_low
SCRIB	23513	-0.738925	9.03954	-6.97743	1.96092e-11	3.10119e-10	15.0487	down	Immunity_high vs Immunity_low
SDC1	6382	-0.9314	9.77869	-5.3129	2.12008e-07	1.77644e-06	5.9898	down	Immunity_high vs Immunity_low
SDC4	6385	-0.812549	8.62608	-6.76393	7.13336e-11	1.05195e-09	13.7831	down	Immunity_high vs Immunity_low
SDCBP	6386	0.777185	8.94236	4.84907	2.00358e-06	1.3781e-05	3.82166	up	Immunity_high vs Immunity_low
SEC14L1	6397	0.588457	7.14743	8.39859	1.88118e-15	4.4568e-14	24.1491	up	Immunity_high vs Immunity_low
SEL1L3	23231	1.37203	7.97124	11.0746	4.30211e-24	1.77208e-22	43.8278	up	Immunity_high vs Immunity_low
SELE	6401	0.720106	6.26222	7.39012	1.49695e-12	2.68355e-11	17.5738	up	Immunity_high vs Immunity_low
SELENOI	85465	-0.612182	6.96664	-8.6036	4.54436e-16	1.12516e-14	25.5504	down	Immunity_high vs Immunity_low
SELENOP	6414	1.38053	8.46989	5.78889	1.79964e-08	1.84588e-07	8.38336	up	Immunity_high vs Immunity_low
SELL	6402	2.12492	6.74965	16.5393	5.17668e-44	6.65406e-42	89.3762	up	Immunity_high vs Immunity_low
SEMA4D	10507	1.19175	8.78924	12.3045	2.12906e-28	1.11847e-26	53.6604	up	Immunity_high vs Immunity_low
SEPTIN3	55964	-1.17294	7.64401	-6.0927	3.43447e-09	3.97983e-08	9.99645	down	Immunity_high vs Immunity_low
SEPTIN6	23157	1.07165	6.34957	11.1616	2.16052e-24	9.04323e-23	44.5105	up	Immunity_high vs Immunity_low
SERINC2	347735	-0.824178	7.4226	-5.46848	9.63638e-08	8.60767e-07	6.75373	down	Immunity_high vs Immunity_low
SERPINA1	5265	1.21952	8.57203	7.81588	9.52476e-14	1.955e-12	20.2827	up	Immunity_high vs Immunity_low
SERPINA3	12	-1.18742	10.9908	-3.68589	0.000270827	0.00113491	-0.851536	down	Immunity_high vs Immunity_low
SERPINB1	1992	1.08128	8.25588	13.7787	9.78917e-34	6.85015e-32	65.8624	up	Immunity_high vs Immunity_low
SERPINB5	5268	-1.49387	7.69313	-5.77093	1.98086e-08	2.01352e-07	8.29005	down	Immunity_high vs Immunity_low
SERPINE1	5054	0.624727	6.72556	4.66785	4.61256e-06	2.91791e-05	3.02034	up	Immunity_high vs Immunity_low
SERPINF1	5176	1.25158	8.20859	9.86055	5.00445e-20	1.60817e-18	34.5564	up	Immunity_high vs Immunity_low
SERPING1	710	1.35011	9.38537	12.3999	9.72751e-29	5.26273e-27	54.4377	up	Immunity_high vs Immunity_low
SERTAD4	56256	-1.29593	8.45387	-8.47392	1.11882e-15	2.71453e-14	24.6616	down	Immunity_high vs Immunity_low
SFN	2810	-0.887397	7.65907	-4.7263	3.5345e-06	2.29932e-05	3.27592	down	Immunity_high vs Immunity_low
SFRP1	6422	-1.20565	9.58675	-3.89627	0.000120744	0.000551758	-0.0906563	down	Immunity_high vs Immunity_low
SFRP2	6423	0.813336	9.99425	3.33963	0.000945933	0.00346696	-2.01952	up	Immunity_high vs Immunity_low
SFRP4	6424	1.58709	8.33436	7.06794	1.12496e-11	1.83187e-10	15.5937	up	Immunity_high vs Immunity_low
SGK1	6446	0.838676	9.64506	7.21924	4.39549e-12	7.47317e-11	16.5159	up	Immunity_high vs Immunity_low
SH2B3	10019	1.22599	8.39427	15.5787	2.05926e-40	2.13269e-38	81.1382	up	Immunity_high vs Immunity_low
SH2D1A	4068	1.28589	6.53308	16.3215	3.39739e-43	3.97254e-41	87.5062	up	Immunity_high vs Immunity_low
SH2D3C	10044	1.16604	7.34367	13.0706	3.74903e-31	2.29552e-29	59.9556	up	Immunity_high vs Immunity_low
SH3BGRL	6451	0.778115	9.26082	6.44766	4.58869e-10	6.09717e-09	11.9617	up	Immunity_high vs Immunity_low
SH3BGRL3	83442	0.875099	9.63391	10.6131	1.59811e-22	5.94746e-21	40.2458	up	Immunity_high vs Immunity_low
SH3KBP1	30011	0.777534	9.64594	7.01868	1.52312e-11	2.44943e-10	15.2964	up	Immunity_high vs Immunity_low
SH3RF1	57630	-0.647975	6.98994	-7.14915	6.80448e-12	1.13663e-10	16.087	down	Immunity_high vs Immunity_low
SH3TC1	54436	0.651232	6.49889	9.68743	1.82421e-19	5.70035e-18	33.2769	up	Immunity_high vs Immunity_low
SHANK2	22941	-0.700771	6.45051	-5.6754	3.28746e-08	3.19939e-07	7.79762	down	Immunity_high vs Immunity_low
SHC4	399694	-0.880906	6.61843	-4.07508	5.90862e-05	0.000291158	0.585925	down	Immunity_high vs Immunity_low
SHISAL2A	348378	0.596027	5.80131	10.9549	1.10502e-23	4.4704e-22	42.8928	up	Immunity_high vs Immunity_low
SHROOM3	57619	-0.907899	8.66713	-6.68745	1.12533e-10	1.60467e-09	13.3367	down	Immunity_high vs Immunity_low
SIDT2	51092	0.646019	8.7887	7.60403	3.79775e-13	7.23768e-12	18.922	up	Immunity_high vs Immunity_low
SIPA1	6494	0.7778	8.74572	9.33396	2.46782e-18	7.11077e-17	30.7013	up	Immunity_high vs Immunity_low
SIRPA	140885	0.613586	9.61682	5.72882	2.47837e-08	2.48165e-07	8.07219	up	Immunity_high vs Immunity_low
SIX4	51804	-0.691411	7.843	-6.44237	4.73112e-10	6.27722e-09	11.9318	down	Immunity_high vs Immunity_low
SKAP1	8631	1.49852	7.40026	12.1276	9.05965e-28	4.59936e-26	52.2234	up	Immunity_high vs Immunity_low
SKAP2	8935	0.68583	7.44241	7.54001	5.74039e-13	1.06926e-11	18.5158	up	Immunity_high vs Immunity_low
SKP2	6502	-0.60555	9.16223	-5.15413	4.65596e-07	3.64512e-06	5.22896	down	Immunity_high vs Immunity_low
SLA	6503	1.25799	6.89348	19.7356	5.55106e-56	2.01215e-53	116.771	up	Immunity_high vs Immunity_low
SLA2	84174	0.806188	5.88219	13.4939	1.08042e-32	7.22568e-31	63.4775	up	Immunity_high vs Immunity_low
SLAMF1	6504	1.34537	6.13905	19.0363	2.24127e-53	6.77014e-51	110.807	up	Immunity_high vs Immunity_low
SLAMF7	57823	0.65087	5.76678	11.7978	1.32223e-26	6.19229e-25	49.564	up	Immunity_high vs Immunity_low
SLC11A2	4891	-0.625159	9.68159	-5.53829	6.72669e-08	6.23285e-07	7.10241	down	Immunity_high vs Immunity_low
SLC15A3	51296	1.44858	9.90016	13.589	4.85274e-33	3.30643e-31	64.2725	up	Immunity_high vs Immunity_low
SLC1A3	6507	1.02179	7.96079	8.26493	4.69825e-15	1.07786e-13	23.2467	up	Immunity_high vs Immunity_low
SLC25A10	1468	-0.959004	7.51775	-8.25738	4.94623e-15	1.13046e-13	23.196	down	Immunity_high vs Immunity_low
SLC25A37	51312	-0.851905	8.51787	-6.0205	5.11979e-09	5.75985e-08	9.60725	down	Immunity_high vs Immunity_low
SLC29A3	55315	0.750538	7.04718	10.7726	4.61461e-23	1.7757e-21	41.4764	up	Immunity_high vs Immunity_low
SLC2A1	6513	-1.16714	9.17647	-6.94741	2.35538e-11	3.68325e-10	14.869	down	Immunity_high vs Immunity_low
SLC2A3	6515	1.21543	9.5329	10.4361	6.28283e-22	2.23275e-20	38.8899	up	Immunity_high vs Immunity_low
SLC2A5	6518	0.85352	7.43119	6.42538	5.21909e-10	6.88433e-09	11.8359	up	Immunity_high vs Immunity_low
SLC2A6	11182	0.818484	7.31844	6.95161	2.29585e-11	3.59327e-10	14.894	up	Immunity_high vs Immunity_low
SLC31A2	1318	1.07719	8.35955	11.0799	4.12365e-24	1.70244e-22	43.8698	up	Immunity_high vs Immunity_low
SLC37A2	219855	0.74062	7.18625	8.38749	2.03042e-15	4.80408e-14	24.0738	up	Immunity_high vs Immunity_low
SLC38A6	145389	0.636339	6.56375	7.7755	1.24206e-13	2.5152e-12	20.0215	up	Immunity_high vs Immunity_low
SLC40A1	30061	1.57974	8.67542	9.43061	1.21663e-18	3.57958e-17	31.4005	up	Immunity_high vs Immunity_low
SLC5A1	6523	-0.713104	6.52676	-4.69278	4.11885e-06	2.63688e-05	3.129	down	Immunity_high vs Immunity_low
SLC6A10P	386757	-1.01089	7.91838	-7.0155	1.55316e-11	2.49551e-10	15.2773	down	Immunity_high vs Immunity_low
SLC6A8	6535	-0.785197	6.80547	-7.71942	1.79324e-13	3.55198e-12	19.6601	down	Immunity_high vs Immunity_low
SLC7A5	8140	-0.77569	9.75303	-4.21195	3.3604e-05	0.000176023	1.12216	down	Immunity_high vs Immunity_low
SLC7A7	9056	1.66795	8.85919	18.6487	6.30136e-52	1.58619e-49	107.491	up	Immunity_high vs Immunity_low
SLC9A9	285195	1.23147	6.65596	20.4221	1.57913e-58	8.41771e-56	122.597	up	Immunity_high vs Immunity_low
SLCO2B1	11309	1.72282	9.00038	17.2818	8.43122e-47	1.38916e-44	95.7576	up	Immunity_high vs Immunity_low
SLCO3A1	28232	0.65827	7.11112	7.27005	3.19652e-12	5.51225e-11	16.8287	up	Immunity_high vs Immunity_low
SLFN11	91607	1.30533	8.42404	14.7176	3.33613e-37	2.79926e-35	73.7943	up	Immunity_high vs Immunity_low
SLFN5	162394	0.598894	6.14645	9.39089	1.62775e-18	4.75828e-17	31.1127	up	Immunity_high vs Immunity_low
SLIT3	6586	0.595617	6.57792	4.97202	1.122e-06	8.08233e-06	4.3801	up	Immunity_high vs Immunity_low
SLPI	6590	-1.31581	8.58242	-4.4558	1.18533e-05	6.85916e-05	2.11621	down	Immunity_high vs Immunity_low
SLURP1	57152	-0.68157	6.0967	-3.62565	0.000339049	0.00138555	-1.06232	down	Immunity_high vs Immunity_low
SMAP2	64744	1.02628	7.32824	12.7694	4.59699e-30	2.67897e-28	57.4672	up	Immunity_high vs Immunity_low
SMO	6608	-0.61762	6.59211	-6.98408	1.88284e-11	2.98291e-10	15.0885	down	Immunity_high vs Immunity_low
SMOX	54498	-0.603588	6.84059	-5.62608	4.25965e-08	4.06326e-07	7.54595	down	Immunity_high vs Immunity_low
SMPDL3A	10924	0.641165	7.32269	5.13751	5.05034e-07	3.92843e-06	5.15041	up	Immunity_high vs Immunity_low
SNORC	389084	-1.34232	7.27014	-4.22251	3.21519e-05	0.000169248	1.1642	down	Immunity_high vs Immunity_low
SNRPN	6638	0.721839	7.88169	4.52806	8.62686e-06	5.15677e-05	2.4202	up	Immunity_high vs Immunity_low
SNX10	29887	1.01959	6.87589	9.01632	2.45422e-17	6.59944e-16	28.4317	up	Immunity_high vs Immunity_low
SNX2	6643	0.792063	8.47932	10.0318	1.37756e-20	4.56434e-19	35.8329	up	Immunity_high vs Immunity_low
SNX29	92017	0.591497	6.86155	8.5635	6.00936e-16	1.4718e-14	25.2747	up	Immunity_high vs Immunity_low
SOCS1	8651	0.717809	6.43445	9.79015	8.47996e-20	2.70582e-18	34.0346	up	Immunity_high vs Immunity_low
SOCS3	9021	0.70186	6.49309	8.07185	1.73521e-14	3.77637e-13	21.9593	up	Immunity_high vs Immunity_low
SOD2	6648	0.724905	9.58571	4.18949	3.69017e-05	0.000191144	1.0331	up	Immunity_high vs Immunity_low
SOGA1	140710	-0.961254	7.59374	-9.98295	1.99203e-20	6.55236e-19	35.4679	down	Immunity_high vs Immunity_low
SORBS2	8470	-0.609083	7.36192	-3.24218	0.00132116	0.00469229	-2.329	down	Immunity_high vs Immunity_low
SORD	6652	-0.66691	9.90353	-4.47108	1.10864e-05	6.46703e-05	2.18017	down	Immunity_high vs Immunity_low
SORT1	6272	-0.716888	8.39822	-6.62808	1.59908e-10	2.24839e-09	12.9928	down	Immunity_high vs Immunity_low
SOSTDC1	25928	-0.829288	6.90332	-4.00707	7.77755e-05	0.000371535	0.325396	down	Immunity_high vs Immunity_low
SOX10	6663	-1.11415	7.44707	-3.86659	0.000135614	0.000612018	-0.200318	down	Immunity_high vs Immunity_low
SOX11	6664	-0.821143	7.40653	-3.41104	0.000736802	0.00277222	-1.78731	down	Immunity_high vs Immunity_low
SOX18	54345	0.628511	8.74722	4.82031	2.29089e-06	1.55343e-05	3.69273	up	Immunity_high vs Immunity_low
SOX4	6659	-0.85906	8.84087	-7.64617	2.88983e-13	5.60164e-12	19.1907	down	Immunity_high vs Immunity_low
SOX8	30812	-0.834254	7.25593	-3.01778	0.0027669	0.00896929	-3.00908	down	Immunity_high vs Immunity_low
SOX9	6662	-1.26178	8.34803	-8.30043	3.68752e-15	8.53545e-14	23.4855	down	Immunity_high vs Immunity_low
SP110	3431	1.17076	8.30953	13.0659	3.90012e-31	2.37201e-29	59.9164	up	Immunity_high vs Immunity_low
SP140	11262	1.08413	6.1569	14.6742	4.83553e-37	4.02015e-35	73.4255	up	Immunity_high vs Immunity_low
SPARCL1	8404	0.958888	9.78317	5.208	3.57261e-07	2.87522e-06	5.48495	up	Immunity_high vs Immunity_low
SPI1	6688	1.2695	7.25768	16.5412	5.09199e-44	6.59194e-42	89.3926	up	Immunity_high vs Immunity_low
SPIB	6689	0.880225	6.20642	5.1759	4.18442e-07	3.31027e-06	5.33215	up	Immunity_high vs Immunity_low
SPINT1	6692	-0.728209	7.38836	-6.75597	7.48161e-11	1.09884e-09	13.7364	down	Immunity_high vs Immunity_low
SPINT2	10653	-0.971715	11.631	-7.27204	3.15685e-12	5.45942e-11	16.8409	down	Immunity_high vs Immunity_low
SPIRE2	84501	-0.765583	6.55456	-7.04098	1.32813e-11	2.14537e-10	15.4308	down	Immunity_high vs Immunity_low
SPOCK2	9806	1.93552	8.93788	10.4119	7.57086e-22	2.65919e-20	38.7052	up	Immunity_high vs Immunity_low
SPON1	10418	0.607784	7.70655	3.18735	0.00158883	0.00552071	-2.49936	up	Immunity_high vs Immunity_low
SPPL2A	84888	0.722866	8.84173	7.6355	3.09717e-13	5.96525e-12	19.1226	up	Immunity_high vs Immunity_low
SPR	6697	-0.77125	7.42887	-7.66019	2.63817e-13	5.14131e-12	19.2803	down	Immunity_high vs Immunity_low
SPRY1	10252	0.642683	8.66221	4.51563	9.11402e-06	5.40873e-05	2.36762	up	Immunity_high vs Immunity_low
SQLE	6713	-0.771294	8.9741	-5.32135	2.0322e-07	1.70912e-06	6.03078	down	Immunity_high vs Immunity_low
SQOR	58472	0.586559	7.7482	6.30978	1.0127e-09	1.27548e-08	11.1882	up	Immunity_high vs Immunity_low
SRD5A1	6715	-0.60708	7.36437	-4.24509	2.92467e-05	0.000155491	1.25436	down	Immunity_high vs Immunity_low
SRGN	5552	2.37664	9.87902	17.0426	6.67079e-46	1.04225e-43	93.7016	up	Immunity_high vs Immunity_low
SRPX	8406	0.844799	8.17057	4.71386	3.74142e-06	2.4235e-05	3.22128	up	Immunity_high vs Immunity_low
SSH2	85464	0.606997	7.49552	9.13141	1.07299e-17	2.96899e-16	29.249	up	Immunity_high vs Immunity_low
ST3GAL5	8869	1.18706	7.43933	12.9181	1.33692e-30	7.91841e-29	58.6933	up	Immunity_high vs Immunity_low
ST6GAL1	6480	0.93632	9.07248	6.39014	6.39375e-10	8.32473e-09	11.6375	up	Immunity_high vs Immunity_low
ST6GALNAC4	27090	0.641763	7.12549	7.18356	5.49257e-12	9.24302e-11	16.2972	up	Immunity_high vs Immunity_low
ST8SIA4	7903	0.729739	6.11012	16.9995	9.68638e-46	1.47526e-43	93.3309	up	Immunity_high vs Immunity_low
STAB1	23166	1.00449	7.31587	9.30107	3.13661e-18	8.95243e-17	30.4643	up	Immunity_high vs Immunity_low
STAC2	342667	-1.00503	7.05553	-4.65942	4.79216e-06	3.02308e-05	2.98368	down	Immunity_high vs Immunity_low
STAMBPL1	57559	1.16746	7.39642	12.9979	6.87828e-31	4.12788e-29	59.3531	up	Immunity_high vs Immunity_low
STAP2	55620	-0.728418	6.79032	-7.39994	1.40635e-12	2.53619e-11	17.6351	down	Immunity_high vs Immunity_low
STARD5	80765	0.617736	6.42185	8.32466	3.12436e-15	7.26905e-14	23.6489	up	Immunity_high vs Immunity_low
STAT1	6772	1.32228	10.8856	8.12241	1.23468e-14	2.73228e-13	22.2946	up	Immunity_high vs Immunity_low
STAT4	6775	1.78013	7.06808	20.1139	2.18626e-57	9.43424e-55	119.986	up	Immunity_high vs Immunity_low
STAT5A	6776	0.865092	7.56064	7.92457	4.64148e-14	9.74766e-13	20.9903	up	Immunity_high vs Immunity_low
STC2	8614	-0.811081	7.95437	-4.8847	1.69568e-06	1.1802e-05	3.98226	down	Immunity_high vs Immunity_low
STEAP3	55240	-0.675158	8.56317	-5.1649	4.41664e-07	3.47277e-06	5.27995	down	Immunity_high vs Immunity_low
STIL	6491	-0.687711	8.0546	-5.94129	7.90208e-09	8.57075e-08	9.18443	down	Immunity_high vs Immunity_low
STK10	6793	0.867029	6.69342	14.8573	1.00943e-37	8.88106e-36	74.9821	up	Immunity_high vs Immunity_low
STK17B	9262	1.03555	6.84827	14.4119	4.53536e-36	3.58947e-34	71.2014	up	Immunity_high vs Immunity_low
STK4	6789	0.954638	9.62583	14.2527	1.75849e-35	1.33351e-33	69.8551	up	Immunity_high vs Immunity_low
STMN1	3925	-0.687326	8.74451	-5.49245	8.52069e-08	7.69452e-07	6.87306	down	Immunity_high vs Immunity_low
STOM	2040	0.592046	7.4655	4.41632	1.4076e-05	8.03255e-05	1.95194	up	Immunity_high vs Immunity_low
STOX2	56977	-0.726962	7.28101	-5.08631	6.47896e-07	4.91934e-06	4.90985	down	Immunity_high vs Immunity_low
STX11	8676	1.38336	6.97264	17.8255	7.66886e-49	1.49452e-46	100.429	up	Immunity_high vs Immunity_low
STX19	415117	-0.743596	6.59602	-4.59992	6.26466e-06	3.85537e-05	2.72672	down	Immunity_high vs Immunity_low
SUSD1	64420	0.673432	7.2018	10.2627	2.37689e-21	8.15884e-20	37.5723	up	Immunity_high vs Immunity_low
SUSD3	203328	1.18531	7.02851	11.9604	3.53597e-27	1.71812e-25	50.8724	up	Immunity_high vs Immunity_low
SVEP1	79987	1.07989	7.55292	6.98387	1.88524e-11	2.98411e-10	15.0873	up	Immunity_high vs Immunity_low
SYK	6850	1.37132	8.30794	14.9141	6.20371e-38	5.59384e-36	75.4659	up	Immunity_high vs Immunity_low
SYNE3	161176	0.607604	6.14777	9.00264	2.70684e-17	7.26796e-16	28.3349	up	Immunity_high vs Immunity_low
SYNE4	163183	-0.802433	7.42671	-5.17463	4.21069e-07	3.3267e-06	5.3261	down	Immunity_high vs Immunity_low
SYNM	23336	-0.816148	7.91728	-3.6308	0.000332636	0.00136242	-1.04442	down	Immunity_high vs Immunity_low
SYT11	23208	0.995365	8.42042	9.50434	7.07484e-19	2.10895e-17	31.9364	up	Immunity_high vs Immunity_low
SYT7	9066	-0.808362	7.73593	-5.67909	3.22422e-08	3.15018e-07	7.81649	down	Immunity_high vs Immunity_low
TACC1	6867	0.955375	9.91002	8.80855	1.07694e-16	2.79235e-15	26.9713	up	Immunity_high vs Immunity_low
TACC2	10579	-0.918536	7.07045	-8.35711	2.50142e-15	5.86491e-14	23.8681	down	Immunity_high vs Immunity_low
TACSTD2	4070	-1.13737	11.2309	-5.36131	1.66189e-07	1.41942e-06	6.22557	down	Immunity_high vs Immunity_low
TAGAP	117289	0.669697	5.82073	11.5124	1.31742e-25	5.8522e-24	47.2839	up	Immunity_high vs Immunity_low
TAP1	6890	1.14897	11.0597	7.49571	7.63036e-13	1.40114e-11	18.236	up	Immunity_high vs Immunity_low
TAPBP	6892	0.683686	10.4364	6.4424	4.73025e-10	6.27722e-09	11.932	up	Immunity_high vs Immunity_low
TAPBPL	55080	0.636502	6.89326	7.71748	1.81617e-13	3.59347e-12	19.6476	up	Immunity_high vs Immunity_low
TARP	445347	0.681973	5.76339	8.42516	1.56664e-15	3.72621e-14	24.3295	up	Immunity_high vs Immunity_low
TBC1D10C	374403	1.98937	7.3168	16.4761	8.93274e-44	1.10888e-41	88.8339	up	Immunity_high vs Immunity_low
TBC1D24	57465	-0.65414	6.75179	-6.23033	1.58911e-09	1.9447e-08	10.7483	down	Immunity_high vs Immunity_low
TBC1D2B	23102	0.793526	8.02986	11.395	3.37226e-25	1.47987e-23	46.3519	up	Immunity_high vs Immunity_low
TBC1D9	23158	0.780075	7.41771	6.03089	4.83487e-09	5.46304e-08	9.66306	up	Immunity_high vs Immunity_low
TBXAS1	6916	1.44626	7.47801	16.5103	6.64573e-44	8.42288e-42	89.1279	up	Immunity_high vs Immunity_low
TCEA3	6920	-0.70134	9.11612	-4.32426	2.09161e-05	0.000115083	1.57386	down	Immunity_high vs Immunity_low
TCF4	6925	0.891986	8.51427	7.62298	3.35893e-13	6.43523e-12	19.0428	up	Immunity_high vs Immunity_low
TCIM	56892	0.62266	7.12556	3.44711	0.000648415	0.00248244	-1.66832	up	Immunity_high vs Immunity_low
TCIRG1	10312	1.03401	8.24815	10.5167	3.37285e-22	1.22504e-20	39.506	up	Immunity_high vs Immunity_low
TCL1A	8115	1.22585	5.82543	11.9313	4.47919e-27	2.14764e-25	50.6378	up	Immunity_high vs Immunity_low
TCN2	6948	0.936482	7.21315	10.7301	6.42784e-23	2.45777e-21	41.1481	up	Immunity_high vs Immunity_low
TDO2	6999	1.09273	6.88952	7.75994	1.37555e-13	2.76085e-12	19.921	up	Immunity_high vs Immunity_low
TEAD2	8463	-0.631214	10.2666	-5.13201	5.18776e-07	4.02151e-06	5.12448	down	Immunity_high vs Immunity_low
TEDC2	80178	-0.627125	6.92365	-6.71172	9.74155e-11	1.40458e-09	13.478	down	Immunity_high vs Immunity_low
TEK	7010	0.689133	6.75367	7.76016	1.37354e-13	2.75987e-12	19.9224	up	Immunity_high vs Immunity_low
TENT2	167153	0.61174	7.93514	9.04331	2.02233e-17	5.47874e-16	28.6229	up	Immunity_high vs Immunity_low
TENT5B	115572	-0.615447	7.03903	-4.93504	1.33732e-06	9.48261e-06	4.21092	down	Immunity_high vs Immunity_low
TENT5C	54855	2.01589	8.57828	9.54934	5.07652e-19	1.53345e-17	32.2646	up	Immunity_high vs Immunity_low
TERF1	7013	-0.670659	7.95662	-7.32853	2.21123e-12	3.88892e-11	17.1906	down	Immunity_high vs Immunity_low
TESPA1	9840	0.591495	5.76105	10.6749	9.88122e-23	3.7155e-21	40.7221	up	Immunity_high vs Immunity_low
TFAP2A	7020	-1.37437	9.6954	-8.54005	7.07375e-16	1.72654e-14	25.1138	down	Immunity_high vs Immunity_low
TFAP2C	7022	-1.50971	8.51657	-9.83279	6.16282e-20	1.9769e-18	34.3504	down	Immunity_high vs Immunity_low
TFPI	7035	0.638723	7.73632	4.73759	3.35636e-06	2.19209e-05	3.3256	up	Immunity_high vs Immunity_low
TGFB3	7043	0.608351	7.90752	4.36767	1.7367e-05	9.72679e-05	1.75129	up	Immunity_high vs Immunity_low
TGFBI	7045	0.704958	11.0283	5.06168	7.29879e-07	5.47304e-06	4.79484	up	Immunity_high vs Immunity_low
TGFBR2	7048	1.56222	9.08515	13.3525	3.54359e-32	2.31022e-30	62.298	up	Immunity_high vs Immunity_low
TGM2	7052	1.27699	8.20497	11.2054	1.52713e-24	6.48188e-23	44.8544	up	Immunity_high vs Immunity_low
THEM6	51337	-0.668851	9.35638	-5.20443	3.63612e-07	2.91856e-06	5.46791	down	Immunity_high vs Immunity_low
THEMIS	387357	0.738366	5.74264	14.1639	3.74025e-35	2.74447e-33	69.1054	up	Immunity_high vs Immunity_low
THY1	7070	0.76225	9.88463	5.39846	1.3771e-07	1.19762e-06	6.40768	up	Immunity_high vs Immunity_low
TIGD5	84948	-0.632436	8.44701	-5.9602	7.1269e-09	7.79529e-08	9.28499	down	Immunity_high vs Immunity_low
TIMD4	91937	0.917752	5.73749	11.7471	1.99287e-26	9.26121e-25	49.1571	up	Immunity_high vs Immunity_low
TINF2	26277	0.731559	9.03582	7.68695	2.21645e-13	4.35693e-12	19.4517	up	Immunity_high vs Immunity_low
TJP3	27134	-0.902285	7.97201	-4.94801	1.25762e-06	8.97721e-06	4.27013	down	Immunity_high vs Immunity_low
TK1	7083	-0.70978	8.67787	-5.14694	4.82282e-07	3.76114e-06	5.19494	down	Immunity_high vs Immunity_low
TLR1	7096	0.704201	6.89564	8.83372	9.0119e-17	2.34672e-15	27.1472	up	Immunity_high vs Immunity_low
TLR10	81793	0.845387	5.79377	12.0623	1.54374e-27	7.75033e-26	51.6946	up	Immunity_high vs Immunity_low
TLR7	51284	1.25296	7.08191	12.5691	2.41138e-29	1.35306e-27	55.822	up	Immunity_high vs Immunity_low
TLR8	51311	1.54008	6.47653	20.7333	1.119e-59	6.99337e-57	125.228	up	Immunity_high vs Immunity_low
TM4SF1	4071	-1.14666	12.1564	-6.69925	1.0491e-10	1.50189e-09	13.4054	down	Immunity_high vs Immunity_low
TM6SF1	53346	0.88521	6.52678	11.782	1.50256e-26	7.00061e-25	49.4372	up	Immunity_high vs Immunity_low
TMED3	23423	-0.606263	11.6054	-5.53264	6.92625e-08	6.4014e-07	7.07404	down	Immunity_high vs Immunity_low
TMEM106C	79022	-0.746063	9.33754	-7.00658	1.64053e-11	2.62195e-10	15.2236	down	Immunity_high vs Immunity_low
TMEM119	338773	1.7063	8.78687	11.2097	1.47594e-24	6.27931e-23	44.8882	up	Immunity_high vs Immunity_low
TMEM125	128218	-0.894207	7.63332	-6.48291	3.74057e-10	5.03297e-09	12.1615	down	Immunity_high vs Immunity_low
TMEM132A	54972	-0.753765	7.94639	-5.84185	1.35442e-08	1.41893e-07	8.65987	down	Immunity_high vs Immunity_low
TMEM139	135932	-0.675335	6.43521	-3.84683	0.000146461	0.000655098	-0.272926	down	Immunity_high vs Immunity_low
TMEM140	55281	1.25529	8.02198	16.0778	2.78487e-42	3.17441e-40	85.4151	up	Immunity_high vs Immunity_low
TMEM158	25907	-0.766808	9.36169	-3.08787	0.00220636	0.00736429	-2.80155	down	Immunity_high vs Immunity_low
TMEM163	81615	0.663908	6.01317	8.02562	2.36597e-14	5.07465e-13	21.6539	up	Immunity_high vs Immunity_low
TMEM176A	55365	1.16882	7.4075	11.2002	1.59076e-24	6.73621e-23	44.814	up	Immunity_high vs Immunity_low
TMEM176B	28959	0.92482	6.64616	12.9436	1.08076e-30	6.42222e-29	58.9044	up	Immunity_high vs Immunity_low
TMEM241	85019	-0.93565	7.37707	-7.60362	3.8078e-13	7.24923e-12	18.9194	down	Immunity_high vs Immunity_low
TMEM243	79161	0.813965	8.20922	8.91558	5.03909e-17	1.32938e-15	27.7212	up	Immunity_high vs Immunity_low
TMEM254	80195	-0.615835	8.26272	-5.46164	9.97981e-08	8.89231e-07	6.71978	down	Immunity_high vs Immunity_low
TMEM35B	100506144	0.775939	8.93956	7.54163	5.68109e-13	1.06149e-11	18.526	up	Immunity_high vs Immunity_low
TMEM37	140738	0.684002	6.0883	7.86243	7.00624e-14	1.45621e-12	20.585	up	Immunity_high vs Immunity_low
TMEM54	113452	-1.08465	8.77332	-9.69648	1.70552e-19	5.33867e-18	33.3434	down	Immunity_high vs Immunity_low
TMEM79	84283	-1.16538	8.67646	-7.18632	5.39894e-12	9.11083e-11	16.3141	down	Immunity_high vs Immunity_low
TMEM9	252839	-0.733067	8.85493	-9.03001	2.22487e-17	6.00052e-16	28.5286	down	Immunity_high vs Immunity_low
TMEM97	27346	-0.721891	8.70581	-6.86146	3.96833e-11	6.04387e-10	14.3576	down	Immunity_high vs Immunity_low
TMPRSS13	84000	-0.617799	6.35082	-6.73494	8.48263e-11	1.23585e-09	13.6135	down	Immunity_high vs Immunity_low
TMSB15A	11013	-1.48171	7.94424	-6.25439	1.38705e-09	1.71013e-08	10.8811	down	Immunity_high vs Immunity_low
TMSB15B	286527	-0.871508	8.31098	-5.00334	9.66145e-07	7.08063e-06	4.5243	down	Immunity_high vs Immunity_low
TNFAIP3	7128	1.1854	7.92814	13.1778	1.53146e-31	9.47309e-30	60.8446	up	Immunity_high vs Immunity_low
TNFAIP8	25816	1.21641	6.67343	15.6954	7.53461e-41	8.08031e-39	82.1374	up	Immunity_high vs Immunity_low
TNFRSF13B	23495	1.16049	6.03642	10.9857	8.67146e-24	3.5238e-22	43.1331	up	Immunity_high vs Immunity_low
TNFRSF14	8764	1.38903	9.94174	14.8	1.64876e-37	1.41622e-35	74.4946	up	Immunity_high vs Immunity_low
TNFRSF17	608	1.72766	6.63705	10.8683	2.18178e-23	8.63377e-22	42.2187	up	Immunity_high vs Immunity_low
TNFRSF1B	7133	1.24528	7.03028	18.4615	3.16391e-51	7.6457e-49	105.887	up	Immunity_high vs Immunity_low
TNFRSF25	8718	0.773575	7.61292	6.34746	8.16667e-10	1.04381e-08	11.3984	up	Immunity_high vs Immunity_low
TNFRSF4	7293	1.23008	7.70968	16.2308	7.43369e-43	8.63643e-41	86.7279	up	Immunity_high vs Immunity_low
TNFRSF6B	8771	0.687681	6.86672	6.1413	2.61995e-09	3.09342e-08	10.2605	up	Immunity_high vs Immunity_low
TNFSF10	8743	0.878989	9.26882	5.13322	5.15714e-07	4.00283e-06	5.13019	up	Immunity_high vs Immunity_low
TNFSF13	8741	1.03649	7.64987	14.254	1.73955e-35	1.32469e-33	69.8659	up	Immunity_high vs Immunity_low
TNFSF13B	10673	1.66565	8.6799	12.2047	4.82334e-28	2.49055e-26	52.8489	up	Immunity_high vs Immunity_low
TNFSF14	8740	0.645135	5.93595	12.1554	7.21619e-28	3.68412e-26	52.4491	up	Immunity_high vs Immunity_low
TNFSF4	7292	0.590775	6.56537	6.38601	6.54736e-10	8.49422e-09	11.6143	up	Immunity_high vs Immunity_low
TNS3	64759	0.680651	10.1146	6.9533	2.27228e-11	3.56252e-10	14.9042	up	Immunity_high vs Immunity_low
TOP1MT	116447	-0.64413	8.46401	-5.49683	8.33098e-08	7.55034e-07	6.8949	down	Immunity_high vs Immunity_low
TOP2A	7153	-0.741064	9.25928	-4.56212	7.41667e-06	4.4975e-05	2.56496	down	Immunity_high vs Immunity_low
TOX2	84969	1.3344	7.53104	10.9392	1.25083e-23	5.02661e-22	42.77	up	Immunity_high vs Immunity_low
TPD52	7163	-0.751361	8.06921	-5.09314	6.26788e-07	4.77909e-06	4.94182	down	Immunity_high vs Immunity_low
TPD52L1	7164	-0.855745	8.46142	-5.12468	5.3766e-07	4.15192e-06	5.08994	down	Immunity_high vs Immunity_low
TPK1	27010	1.05011	6.83693	15.2367	3.89825e-39	3.7382e-37	78.2157	up	Immunity_high vs Immunity_low
TPSAB1	7177	1.39547	7.27641	6.63928	1.49672e-10	2.10937e-09	13.0575	up	Immunity_high vs Immunity_low
TPST2	8459	0.885166	9.12624	9.68534	1.8529e-19	5.78002e-18	33.2614	up	Immunity_high vs Immunity_low
TPT1	7178	0.606703	10.6685	4.24908	2.87601e-05	0.000153263	1.27034	up	Immunity_high vs Immunity_low
TPX2	22974	-0.792937	7.60671	-5.85543	1.25886e-08	1.32649e-07	8.73107	down	Immunity_high vs Immunity_low
TRAF1	7185	0.65816	6.32131	11.1588	2.20984e-24	9.22838e-23	44.4881	up	Immunity_high vs Immunity_low
TRAF3IP3	80342	1.4484	6.85078	13.3379	4.00379e-32	2.5916e-30	62.1767	up	Immunity_high vs Immunity_low
TRANK1	9881	1.09968	7.30495	13.8803	4.1447e-34	2.93432e-32	66.7161	up	Immunity_high vs Immunity_low
TRAT1	50852	1.19878	6.05934	18.426	4.29837e-51	1.02505e-48	105.582	up	Immunity_high vs Immunity_low
TRDV2	28517	2.57925	7.68054	20.3714	2.43211e-58	1.22443e-55	122.168	up	Immunity_high vs Immunity_low
TRIM2	23321	-0.822561	7.78575	-4.98597	1.0498e-06	7.62894e-06	4.44423	down	Immunity_high vs Immunity_low
TRIM21	6737	0.780066	7.53727	10.8185	3.22196e-23	1.25043e-21	41.8324	up	Immunity_high vs Immunity_low
TRIM29	23650	-0.705436	6.69851	-4.34157	1.94245e-05	0.000107859	1.64444	down	Immunity_high vs Immunity_low
TRIP13	9319	-0.91017	7.91844	-6.02795	4.91385e-09	5.54536e-08	9.64727	down	Immunity_high vs Immunity_low
TROAP	10024	-0.656007	7.27214	-5.79914	1.70353e-08	1.75226e-07	8.43675	down	Immunity_high vs Immunity_low
TRPV2	51393	1.4058	7.28142	18.1555	4.43421e-50	9.56733e-48	103.263	up	Immunity_high vs Immunity_low
TRPV6	55503	-0.803644	6.88506	-5.00429	9.61763e-07	7.05708e-06	4.52868	down	Immunity_high vs Immunity_low
TSC22D3	1831	0.927205	8.13742	6.71878	9.34031e-11	1.35103e-09	13.5191	up	Immunity_high vs Immunity_low
TSHZ2	128553	0.768015	7.35559	6.29736	1.08691e-09	1.36232e-08	11.1192	up	Immunity_high vs Immunity_low
TSPAN3	10099	0.59032	8.05499	4.15101	4.32834e-05	0.000219555	0.881448	up	Immunity_high vs Immunity_low
TSPAN4	7106	0.668078	8.44229	7.51736	6.64037e-13	1.22453e-11	18.3726	up	Immunity_high vs Immunity_low
TSPAN6	7105	-0.685169	7.96932	-6.70994	9.84499e-11	1.41837e-09	13.4676	down	Immunity_high vs Immunity_low
TSPAN7	7102	0.995383	6.77115	6.52964	2.84951e-10	3.89475e-09	12.4276	up	Immunity_high vs Immunity_low
TSPYL5	85453	-0.793658	8.19992	-4.84811	2.01256e-06	1.3827e-05	3.81736	down	Immunity_high vs Immunity_low
TTK	7272	-0.897448	7.65362	-6.03274	4.78603e-09	5.41461e-08	9.67295	down	Immunity_high vs Immunity_low
TTLL12	23170	-0.792531	8.33798	-8.97876	3.21096e-17	8.60879e-16	28.1662	down	Immunity_high vs Immunity_low
TTLL4	9654	-0.77824	7.31713	-5.86771	1.1781e-08	1.245e-07	8.7956	down	Immunity_high vs Immunity_low
TTYH1	57348	-1.77863	7.3009	-6.02622	4.96106e-09	5.59168e-08	9.63795	down	Immunity_high vs Immunity_low
TUBB2A	7280	-0.775771	7.11751	-5.47309	9.41116e-08	8.42727e-07	6.77666	down	Immunity_high vs Immunity_low
TUFT1	7286	-0.760668	8.2489	-6.59727	1.91719e-10	2.66058e-09	12.8153	down	Immunity_high vs Immunity_low
TUSC3	7991	-0.668768	7.80106	-3.90415	0.000117063	0.000537261	-0.0614091	down	Immunity_high vs Immunity_low
TXNDC5	81567	1.08961	8.41928	7.69472	2.10699e-13	4.14627e-12	19.5015	up	Immunity_high vs Immunity_low
TXNIP	10628	1.2229	9.86139	11.6123	5.90496e-26	2.66886e-24	48.0797	up	Immunity_high vs Immunity_low
TYMP	1890	0.757635	11.7081	6.05029	4.34409e-09	4.93619e-08	9.76739	up	Immunity_high vs Immunity_low
TYMSOS	494514	-0.975448	7.63471	-6.82828	4.84773e-11	7.29736e-10	14.1615	down	Immunity_high vs Immunity_low
TYROBP	7305	1.85415	10.6713	17.1978	1.74269e-46	2.84545e-44	95.0359	up	Immunity_high vs Immunity_low
UBASH3A	53347	0.819462	5.86992	12.745	5.62871e-30	3.25926e-28	57.2662	up	Immunity_high vs Immunity_low
UBD	10537	2.35748	9.29366	8.67882	2.68513e-16	6.76848e-15	26.0695	up	Immunity_high vs Immunity_low
UBE2C	11065	-1.02937	10.0408	-5.45993	1.00672e-07	8.95281e-07	6.71132	down	Immunity_high vs Immunity_low
UBE2L6	9246	1.24471	7.86576	11.1936	1.67659e-24	7.0831e-23	44.7619	up	Immunity_high vs Immunity_low
UBE2S	27338	-0.873403	9.78171	-6.68377	1.15018e-10	1.63882e-09	13.3153	down	Immunity_high vs Immunity_low
UBE2T	29089	-0.752105	8.06389	-5.1935	3.83742e-07	3.05981e-06	5.41582	down	Immunity_high vs Immunity_low
UBQLN4	56893	-0.77348	10.0149	-7.13247	7.54683e-12	1.25255e-10	15.9853	down	Immunity_high vs Immunity_low
UCK2	7371	-0.683272	8.91258	-5.96534	6.92961e-09	7.59784e-08	9.31234	down	Immunity_high vs Immunity_low
UCP2	7351	1.15236	8.77096	7.4213	1.22763e-12	2.22719e-11	17.7687	up	Immunity_high vs Immunity_low
UGCG	7357	0.815158	8.23474	8.78313	1.28889e-16	3.33235e-15	26.794	up	Immunity_high vs Immunity_low
UHRF1	29128	-0.619215	8.45518	-4.73794	3.35093e-06	2.18934e-05	3.32715	down	Immunity_high vs Immunity_low
UNC93B1	81622	0.603734	8.86998	6.34376	8.34136e-10	1.06314e-08	11.3777	up	Immunity_high vs Immunity_low
UNG	7374	-0.750711	8.50625	-6.50438	3.30146e-10	4.48543e-09	12.2836	down	Immunity_high vs Immunity_low
UQCRH	7388	-0.606274	7.79226	-4.17196	3.96897e-05	0.000203432	0.96384	down	Immunity_high vs Immunity_low
USP13	8975	-0.600004	8.05178	-5.25234	2.86826e-07	2.34586e-06	5.69732	down	Immunity_high vs Immunity_low
VAMP1	6843	0.764083	7.49769	8.0523	1.9786e-14	4.28436e-13	21.83	up	Immunity_high vs Immunity_low
VAMP5	10791	1.632	9.42675	17.993	1.8047e-49	3.71687e-47	101.868	up	Immunity_high vs Immunity_low
VANGL2	57216	-0.976356	7.99035	-4.69816	4.01923e-06	2.5804e-05	3.1525	down	Immunity_high vs Immunity_low
VASH1	22846	0.655469	7.53196	7.77132	1.2766e-13	2.58227e-12	19.9945	up	Immunity_high vs Immunity_low
VAV1	7409	0.948021	6.14975	18.9349	5.36181e-53	1.5184e-50	109.94	up	Immunity_high vs Immunity_low
VCAM1	7412	1.79599	9.51929	12.4787	5.08322e-29	2.81738e-27	55.0819	up	Immunity_high vs Immunity_low
VEGFA	7422	-0.918143	7.59699	-6.22554	1.63263e-09	1.99068e-08	10.722	down	Immunity_high vs Immunity_low
VGF	7425	-0.779335	6.57931	-5.12537	5.35856e-07	4.14151e-06	5.09319	down	Immunity_high vs Immunity_low
VGLL1	51442	-0.78525	7.56074	-2.99856	0.0029419	0.00946714	-3.06518	down	Immunity_high vs Immunity_low
VGLL4	9686	-0.803718	10.065	-8.12796	1.18934e-14	2.63516e-13	22.3314	down	Immunity_high vs Immunity_low
VOPP1	81552	0.597922	6.89061	6.23827	1.51942e-09	1.86445e-08	10.7921	up	Immunity_high vs Immunity_low
VPREB3	29802	1.41257	6.48516	9.75159	1.13108e-19	3.59014e-18	33.7497	up	Immunity_high vs Immunity_low
VSIG4	11326	1.15489	6.90446	10.1446	5.85113e-21	1.95657e-19	36.6805	up	Immunity_high vs Immunity_low
VSNL1	7447	-0.593091	6.24594	-3.93385	0.000104128	0.000483035	0.0492546	down	Immunity_high vs Immunity_low
VTCN1	79679	-1.46664	9.56074	-5.3753	1.54848e-07	1.33008e-06	6.29404	down	Immunity_high vs Immunity_low
VWF	7450	0.946048	10.3201	7.82069	9.228e-14	1.90055e-12	20.3138	up	Immunity_high vs Immunity_low
WARS1	7453	1.26017	10.3804	9.16073	8.68312e-18	2.41369e-16	29.4581	up	Immunity_high vs Immunity_low
WAS	7454	1.99253	9.06216	22.3887	9.8362e-66	1.1142e-62	139.081	up	Immunity_high vs Immunity_low
WIPF1	7456	1.57049	7.52558	20.0081	5.39753e-57	2.27499e-54	119.088	up	Immunity_high vs Immunity_low
WWC1	23286	-0.618925	7.0485	-5.81566	1.55916e-08	1.61108e-07	8.52289	down	Immunity_high vs Immunity_low
XAF1	54739	1.08506	8.88119	7.3508	1.92076e-12	3.40624e-11	17.3289	up	Immunity_high vs Immunity_low
XBP1	7494	0.822288	11.1886	4.9512	1.23874e-06	8.86336e-06	4.28471	up	Immunity_high vs Immunity_low
XIST	7503	0.627019	7.63981	4.60212	6.20308e-06	3.82007e-05	2.73619	up	Immunity_high vs Immunity_low
YBX2	51087	-0.616805	6.60067	-4.98694	1.04494e-06	7.59971e-06	4.4487	down	Immunity_high vs Immunity_low
YES1	7525	-0.692081	8.2192	-5.74897	2.22677e-08	2.24211e-07	8.17626	down	Immunity_high vs Immunity_low
ZAP70	7535	1.26261	6.21749	13.8163	7.12448e-34	5.00481e-32	66.178	up	Immunity_high vs Immunity_low
ZBED2	79413	0.778011	5.76615	11.5279	1.16383e-25	5.18261e-24	47.4068	up	Immunity_high vs Immunity_low
ZBTB7C	201501	-0.637481	6.49313	-4.97565	1.10276e-06	7.97285e-06	4.39677	down	Immunity_high vs Immunity_low
ZCCHC24	219654	0.631638	7.72171	5.01281	9.2333e-07	6.80538e-06	4.56801	up	Immunity_high vs Immunity_low
ZEB2	9839	1.1048	6.58939	15.0535	1.87862e-38	1.74606e-36	76.6529	up	Immunity_high vs Immunity_low
ZFP36	7538	0.993173	9.51546	7.0525	1.23725e-11	2.00752e-10	15.5003	up	Immunity_high vs Immunity_low
ZG16B	124220	-0.668876	6.85713	-2.61777	0.00930391	0.0257914	-4.10699	down	Immunity_high vs Immunity_low
ZIC2	7546	-0.600536	6.28871	-3.12625	0.00194577	0.00657317	-2.68603	down	Immunity_high vs Immunity_low
ZNF165	7718	-0.610639	6.95866	-5.93236	8.29637e-09	8.95553e-08	9.13701	down	Immunity_high vs Immunity_low
ZNF239	8187	-0.824945	7.53962	-7.19897	4.98934e-12	8.4511e-11	16.3915	down	Immunity_high vs Immunity_low
ZNF462	58499	-0.895057	8.77468	-5.94168	7.88543e-09	8.55781e-08	9.18648	down	Immunity_high vs Immunity_low
ZNF671	79891	0.837774	6.42659	11.2849	8.1145e-25	3.5016e-23	45.4813	up	Immunity_high vs Immunity_low
ZNF683	257101	1.27088	6.73085	10.6038	1.71778e-22	6.37973e-21	40.1743	up	Immunity_high vs Immunity_low
ZNF750	79755	-0.878554	6.74966	-6.43062	5.06354e-10	6.68889e-09	11.8655	down	Immunity_high vs Immunity_low
ZNF831	128611	0.983403	5.88872	14.8533	1.04437e-37	9.10009e-36	74.9483	up	Immunity_high vs Immunity_low
ACAP1	9744	0.724214	6.9711	8.84285	8.44742e-17	7.73237e-15	27.4952	up	Immunity_medium vs Immunity_low
ACP5	54	0.598543	7.31782	5.50941	7.80836e-08	2.60145e-06	7.35413	up	Immunity_medium vs Immunity_low
ACSL5	51703	0.667507	8.08194	8.02378	2.3953e-14	1.66971e-12	21.9583	up	Immunity_medium vs Immunity_low
ADAMDEC1	27299	1.18292	7.73552	10.0261	1.43751e-20	1.78917e-18	36.0227	up	Immunity_medium vs Immunity_low
ADAP2	55803	0.6012	8.39372	8.76842	1.42983e-16	1.28288e-14	26.9788	up	Immunity_medium vs Immunity_low
ADGRE5	976	0.694159	8.68125	9.92163	3.16244e-20	3.82107e-18	35.2473	up	Immunity_medium vs Immunity_low
AIF1	199	0.882836	8.10894	10.8491	2.53608e-23	4.37751e-21	42.2613	up	Immunity_medium vs Immunity_low
AIM2	9447	0.862155	7.03733	8.64419	3.42224e-16	2.93955e-14	26.1225	up	Immunity_medium vs Immunity_low
ALOX5	240	0.896607	9.21705	11.2876	7.94235e-25	1.71366e-22	45.6715	up	Immunity_medium vs Immunity_low
ALOX5AP	241	0.971536	9.80768	8.84942	8.06305e-17	7.45585e-15	27.541	up	Immunity_medium vs Immunity_low
ALPL	249	0.628935	8.31892	4.48415	1.04689e-05	0.00022943	2.65543	up	Immunity_medium vs Immunity_low
APBB1IP	54518	0.713196	8.16887	12.0177	2.2186e-27	7.44629e-25	51.464	up	Immunity_medium vs Immunity_low
APOBEC3G	60489	1.02238	7.32541	14.0294	1.17234e-34	1.06237e-31	67.9773	up	Immunity_medium vs Immunity_low
APOC1	341	1.14938	10.2644	9.46684	9.32387e-19	9.76796e-17	31.9209	up	Immunity_medium vs Immunity_low
APOE	348	0.797006	11.868	8.513	8.53475e-16	7.06319e-14	25.2262	up	Immunity_medium vs Immunity_low
ARHGAP15	55843	0.87925	7.96699	12.339	1.60397e-28	6.18518e-26	54.0523	up	Immunity_medium vs Immunity_low
ARHGAP25	9938	0.758182	7.40646	12.6581	1.15576e-29	4.98737e-27	56.6443	up	Immunity_medium vs Immunity_low
ARHGAP4	393	0.585973	7.79845	8.47214	1.13269e-15	9.28909e-14	24.9486	up	Immunity_medium vs Immunity_low
ARHGAP9	64333	1.00965	8.05664	14.2924	1.25422e-35	1.42072e-32	70.1803	up	Immunity_medium vs Immunity_low
B2M	567	0.62672	12.6482	7.21157	4.61147e-12	2.54812e-10	16.8144	up	Immunity_medium vs Immunity_low
BATF	10538	0.746562	7.27653	8.56016	6.15072e-16	5.16091e-14	25.5474	up	Immunity_medium vs Immunity_low
BST2	684	0.648031	8.45847	4.25921	2.75589e-05	0.000542321	1.73603	up	Immunity_medium vs Immunity_low
BTN3A2	11118	0.598371	7.65777	7.2581	3.44572e-12	1.92748e-10	17.0989	up	Immunity_medium vs Immunity_low
BTN3A3	10384	0.589584	6.99373	10.1606	5.18011e-21	6.85287e-19	37.0266	up	Immunity_medium vs Immunity_low
C15orf48	84419	0.890978	8.50548	7.15553	6.53991e-12	3.52766e-10	16.4734	up	Immunity_medium vs Immunity_low
C1orf162	128346	0.861123	9.5098	13.302	5.41106e-32	2.88441e-29	61.9308	up	Immunity_medium vs Immunity_low
C1orf54	79630	0.642877	8.93582	10.2023	3.77007e-21	5.09915e-19	37.3392	up	Immunity_medium vs Immunity_low
C1QA	712	1.08215	7.8463	14.2215	2.29338e-35	2.44501e-32	69.5855	up	Immunity_medium vs Immunity_low
C1QB	713	1.33975	11.031	14.6822	4.51504e-37	6.81922e-34	73.4568	up	Immunity_medium vs Immunity_low
C1QC	714	1.05682	10.4652	12.2146	4.44594e-28	1.57996e-25	53.0478	up	Immunity_medium vs Immunity_low
C1R	715	0.618903	7.59914	4.90562	1.53671e-06	4.04816e-05	4.4882	up	Immunity_medium vs Immunity_low
C1S	716	0.826468	10.2841	7.84453	7.88517e-14	5.21573e-12	20.7919	up	Immunity_medium vs Immunity_low
C2	717	0.770363	7.45901	10.7046	7.84111e-23	1.30378e-20	41.1502	up	Immunity_medium vs Immunity_low
C3	718	0.721029	8.4531	5.36867	1.60128e-07	5.07369e-06	6.66154	up	Immunity_medium vs Immunity_low
CALML5	51806	-0.755113	8.74692	-2.8153	0.00519894	0.0381944	-3.13425	down	Immunity_medium vs Immunity_low
CAMK1G	57172	0.941538	6.83183	7.10425	8.98936e-12	4.73614e-10	16.1629	up	Immunity_medium vs Immunity_low
CASP1	834	0.809546	8.42385	11.7816	1.50738e-26	4.33647e-24	49.5763	up	Immunity_medium vs Immunity_low
CASP4	837	0.66244	8.80171	10.1032	8.01853e-21	1.03806e-18	36.5968	up	Immunity_medium vs Immunity_low
CCL13	6357	0.832571	6.85268	6.90865	2.98162e-11	1.50947e-09	14.9934	up	Immunity_medium vs Immunity_low
CCL19	6363	1.32016	8.59614	6.23892	1.51384e-09	6.27846e-08	11.172	up	Immunity_medium vs Immunity_low
CCL2	6347	0.753579	9.63355	6.90807	2.99212e-11	1.51056e-09	14.99	up	Immunity_medium vs Immunity_low
CCL3L3	414062	0.749153	8.5204	7.37572	1.64017e-12	9.46699e-11	17.824	up	Immunity_medium vs Immunity_low
CCL4	6351	0.992592	7.86174	11.117	3.07652e-24	6.19542e-22	44.3381	up	Immunity_medium vs Immunity_low
CCL5	6352	1.48485	10.726	11.3034	7.00409e-25	1.52942e-22	45.7953	up	Immunity_medium vs Immunity_low
CCL8	6355	0.94392	9.26583	6.32952	9.04852e-10	3.805e-08	11.6718	up	Immunity_medium vs Immunity_low
CCND2	894	0.678084	9.30325	6.40381	5.91004e-10	2.55032e-08	12.0858	up	Immunity_medium vs Immunity_low
CCR7	1236	0.893951	6.94431	7.92889	4.51015e-14	3.05007e-12	21.3387	up	Immunity_medium vs Immunity_low
CD14	929	0.92747	9.74249	10.662	1.09246e-22	1.76784e-20	40.8237	up	Immunity_medium vs Immunity_low
CD163	9332	1.03281	8.96006	9.37131	1.87843e-18	1.93436e-16	31.2327	up	Immunity_medium vs Immunity_low
CD19	930	0.847354	6.67242	6.46274	4.20487e-10	1.8633e-08	12.4167	up	Immunity_medium vs Immunity_low
CD2	914	1.35117	8.42145	13.2324	9.69418e-32	5.01993e-29	61.3561	up	Immunity_medium vs Immunity_low
CD247	919	1.18846	8.18964	11.6522	4.28473e-26	1.1376e-23	48.5472	up	Immunity_medium vs Immunity_low
CD27	939	0.87606	6.88981	10.2303	3.04597e-21	4.15077e-19	37.549	up	Immunity_medium vs Immunity_low
CD37	951	0.959755	7.30101	11.6508	4.33097e-26	1.1376e-23	48.5366	up	Immunity_medium vs Immunity_low
CD38	952	1.01576	6.77331	9.2481	4.61103e-18	4.56668e-16	30.3505	up	Immunity_medium vs Immunity_low
CD3D	915	1.53174	8.5549	14.1876	3.05988e-35	3.08096e-32	69.3013	up	Immunity_medium vs Immunity_low
CD3G	917	0.629675	6.39514	9.75174	1.12975e-19	1.32554e-17	33.9954	up	Immunity_medium vs Immunity_low
CD48	962	1.09837	7.59386	12.1321	8.73232e-28	2.98612e-25	52.3826	up	Immunity_medium vs Immunity_low
CD52	1043	1.49131	9.13642	11.2235	1.32179e-24	2.78559e-22	45.1699	up	Immunity_medium vs Immunity_low
CD53	963	0.84792	7.12876	16.0732	2.89832e-42	1.31323e-38	85.2389	up	Immunity_medium vs Immunity_low
CD6	923	0.966049	7.79976	10.4086	7.76318e-22	1.16281e-19	38.8939	up	Immunity_medium vs Immunity_low
CD69	969	0.935208	6.97409	11.2184	1.37635e-24	2.86723e-22	45.1301	up	Immunity_medium vs Immunity_low
CD7	924	0.87995	7.06442	10.1134	7.42058e-21	9.67558e-19	36.673	up	Immunity_medium vs Immunity_low
CD74	972	1.01029	8.2639	12.1707	6.36847e-28	2.21966e-25	52.6937	up	Immunity_medium vs Immunity_low
CD79A	973	1.2954	7.83124	7.64056	2.99709e-13	1.89266e-11	19.4855	up	Immunity_medium vs Immunity_low
CD79B	974	0.827235	7.96038	6.35804	7.68666e-10	3.28261e-08	11.8303	up	Immunity_medium vs Immunity_low
CD86	942	0.88539	8.22421	13.4873	1.14156e-32	7.38918e-30	63.4645	up	Immunity_medium vs Immunity_low
CD8A	925	1.20034	7.79099	11.5133	1.30867e-25	3.20519e-23	47.4474	up	Immunity_medium vs Immunity_low
CDK12	51755	0.725212	7.73474	6.439	4.82413e-10	2.11701e-08	12.2831	up	Immunity_medium vs Immunity_low
CFB	629	0.85013	9.13438	4.44857	1.22332e-05	0.000263319	2.50724	up	Immunity_medium vs Immunity_low
CORO1A	11151	0.831904	8.08049	10.3033	1.74314e-21	2.46818e-19	38.0981	up	Immunity_medium vs Immunity_low
CPVL	54504	0.777861	8.87014	7.9067	5.22599e-14	3.52104e-12	21.1945	up	Immunity_medium vs Immunity_low
CSF1R	1436	0.82597	10.2054	11.7626	1.75829e-26	4.90264e-24	49.4246	up	Immunity_medium vs Immunity_low
CSF2RA	1438	0.637428	6.95644	11.3709	4.08751e-25	9.03439e-23	46.3257	up	Immunity_medium vs Immunity_low
CST7	8530	0.799346	6.99229	12.2302	3.91392e-28	1.41872e-25	53.1733	up	Immunity_medium vs Immunity_low
CTLA4	1493	0.692091	6.65405	9.64821	2.44145e-19	2.73141e-17	33.2379	up	Immunity_medium vs Immunity_low
CTSC	1075	0.772102	9.22551	8.31979	3.23035e-15	2.55663e-13	23.9212	up	Immunity_medium vs Immunity_low
CTSH	1512	0.61871	10.9835	8.65043	3.27597e-16	2.82732e-14	26.1654	up	Immunity_medium vs Immunity_low
CTSK	1513	0.699408	9.89172	5.10762	5.84209e-07	1.66481e-05	5.41615	up	Immunity_medium vs Immunity_low
CXCL10	3627	1.31616	10.217	7.48498	8.17329e-13	4.82517e-11	18.5046	up	Immunity_medium vs Immunity_low
CXCL12	6387	0.733523	9.05175	5.50555	7.96535e-08	2.64888e-06	7.33492	up	Immunity_medium vs Immunity_low
CXCL13	10563	1.06198	7.28369	7.53479	5.93655e-13	3.58647e-11	18.8172	up	Immunity_medium vs Immunity_low
CXCL9	4283	1.91048	9.4994	11.0065	7.36353e-24	1.40481e-21	43.4787	up	Immunity_medium vs Immunity_low
CXCR3	2833	0.735362	6.45595	11.0308	6.07889e-24	1.17206e-21	43.6675	up	Immunity_medium vs Immunity_low
CXCR6	10663	0.625665	6.25138	10.5604	2.40362e-22	3.78811e-20	40.0477	up	Immunity_medium vs Immunity_low
CYBA	1535	0.635918	11.0451	7.58712	4.23648e-13	2.59398e-11	19.1471	up	Immunity_medium vs Immunity_low
CYBB	1536	1.0084	7.57141	15.0874	1.40477e-38	4.24334e-35	76.8768	up	Immunity_medium vs Immunity_low
DCN	1634	0.658289	8.21748	4.12333	4.85093e-05	0.000877428	1.20089	up	Immunity_medium vs Immunity_low
DHRS9	10170	0.730085	6.78291	6.50886	3.21645e-10	1.44653e-08	12.6773	up	Immunity_medium vs Immunity_low
DOCK10	55619	0.731798	7.95118	13.6163	3.85344e-33	2.79359e-30	64.5349	up	Immunity_medium vs Immunity_low
DOCK11	139818	0.590287	7.41605	9.94573	2.63751e-20	3.22988e-18	35.4258	up	Immunity_medium vs Immunity_low
DOCK2	1794	0.97421	8.59114	14.7612	2.29624e-37	4.1617e-34	74.1231	up	Immunity_medium vs Immunity_low
DOCK8	81704	0.632249	7.16232	10.2921	1.89902e-21	2.6548e-19	38.0138	up	Immunity_medium vs Immunity_low
DPT	1805	0.591677	7.3388	5.02985	8.50832e-07	2.31887e-05	5.05514	up	Immunity_medium vs Immunity_low
EGFL6	25975	0.615687	7.14587	5.09364	6.25263e-07	1.75422e-05	5.35091	up	Immunity_medium vs Immunity_low
EMP3	2014	0.700289	9.74444	10.5084	3.59591e-22	5.52307e-20	39.6512	up	Immunity_medium vs Immunity_low
ENPP2	5168	0.590767	7.57713	5.40928	1.30347e-07	4.20359e-06	6.85987	up	Immunity_medium vs Immunity_low
ENTPD1	953	0.60128	7.72254	9.49352	7.66182e-19	8.07342e-17	32.1139	up	Immunity_medium vs Immunity_low
EOMES	8320	0.677364	6.97882	7.31951	2.34097e-12	1.32587e-10	17.4765	up	Immunity_medium vs Immunity_low
EPSTI1	94240	1.00291	9.07858	9.67016	2.07422e-19	2.36435e-17	33.3981	up	Immunity_medium vs Immunity_low
ERAP2	64167	0.709757	7.10202	5.82884	1.45261e-08	5.30787e-07	8.97965	up	Immunity_medium vs Immunity_low
EVI2A	2123	0.68605	7.15292	9.40983	1.41681e-18	1.47577e-16	31.5098	up	Immunity_medium vs Immunity_low
EVI2B	2124	1.07156	8.00194	14.9317	5.33687e-38	1.20907e-34	75.5613	up	Immunity_medium vs Immunity_low
F13A1	2162	0.636317	7.19174	4.59119	6.51438e-06	0.000151562	3.10741	up	Immunity_medium vs Immunity_low
FBP1	2203	0.911163	8.26282	6.62386	1.63935e-10	7.56018e-09	13.3331	up	Immunity_medium vs Immunity_low
FCER1G	2207	1.07817	9.90671	11.6608	3.99734e-26	1.08131e-23	48.6156	up	Immunity_medium vs Immunity_low
FCGR1A	2209	0.634812	6.86778	9.60458	3.37404e-19	3.66175e-17	32.9199	up	Immunity_medium vs Immunity_low
FCGR1B	2210	0.849534	7.28291	8.24438	5.40381e-15	4.11507e-13	23.417	up	Immunity_medium vs Immunity_low
FCGR2A	2212	0.670568	8.01625	7.61424	3.55477e-13	2.19886e-11	19.3186	up	Immunity_medium vs Immunity_low
FCMR	9214	0.728019	7.49653	6.46224	4.21701e-10	1.86412e-08	12.4139	up	Immunity_medium vs Immunity_low
FCN1	2219	0.865734	7.33137	8.74262	1.71494e-16	1.53111e-14	26.8004	up	Immunity_medium vs Immunity_low
FERMT3	83706	0.870644	8.47951	13.9832	1.73326e-34	1.49589e-31	67.5919	up	Immunity_medium vs Immunity_low
FGD2	221472	0.764483	8.07779	10.4067	7.88006e-22	1.17038e-19	38.8792	up	Immunity_medium vs Immunity_low
FGD3	89846	0.598496	8.11295	7.58046	4.42267e-13	2.69887e-11	19.105	up	Immunity_medium vs Immunity_low
FGFR3	2261	-0.653616	7.53814	-3.33958	0.000946074	0.0104484	-1.57818	down	Immunity_medium vs Immunity_low
FGL2	10875	1.11118	8.24337	14.3135	1.04809e-35	1.35683e-32	70.3573	up	Immunity_medium vs Immunity_low
FGR	2268	0.746852	7.82015	9.81631	6.97244e-20	8.31372e-18	34.4699	up	Immunity_medium vs Immunity_low
FKBP11	51303	0.663281	9.37343	6.78393	6.3283e-11	3.09149e-09	14.26	up	Immunity_medium vs Immunity_low
FOLR2	2350	0.705966	6.96916	6.90335	3.07911e-11	1.55016e-09	14.9621	up	Immunity_medium vs Immunity_low
FPR1	2357	0.607028	6.68586	7.63756	3.05595e-13	1.92313e-11	19.4665	up	Immunity_medium vs Immunity_low
FPR3	2359	0.835676	8.04154	10.0636	1.08237e-20	1.37181e-18	36.3018	up	Immunity_medium vs Immunity_low
GBP1	2633	1.05624	8.83655	9.01459	2.48473e-17	2.39538e-15	28.6965	up	Immunity_medium vs Immunity_low
GBP2	2634	1.06128	10.5107	10.9906	8.34652e-24	1.57575e-21	43.3554	up	Immunity_medium vs Immunity_low
GBP4	115361	1.22237	8.21136	11.1416	2.53212e-24	5.15642e-22	44.5298	up	Immunity_medium vs Immunity_low
GBP5	115362	1.28615	7.81679	10.9778	9.23068e-24	1.72471e-21	43.2562	up	Immunity_medium vs Immunity_low
GIMAP4	55303	1.10669	9.57839	15.0651	1.69977e-38	4.40094e-35	76.6889	up	Immunity_medium vs Immunity_low
GIMAP5	55340	0.980054	7.73946	12.8496	2.36174e-30	1.0701e-27	58.2092	up	Immunity_medium vs Immunity_low
GIMAP6	474344	0.751521	7.70738	11.9813	2.9842e-27	9.83376e-25	51.1719	up	Immunity_medium vs Immunity_low
GIMAP7	168537	1.00261	8.37356	10.9448	1.19681e-23	2.17195e-21	43.0006	up	Immunity_medium vs Immunity_low
GLRX	2745	0.59235	8.67015	7.28036	2.9959e-12	1.68626e-10	17.2355	up	Immunity_medium vs Immunity_low
GMFG	9535	0.930461	8.29591	13.5512	6.66789e-33	4.47589e-30	63.9945	up	Immunity_medium vs Immunity_low
GNLY	10578	1.24912	7.8442	9.56413	4.55131e-19	4.82386e-17	32.6257	up	Immunity_medium vs Immunity_low
GP1BB	2812	-0.643931	8.50848	-5.14574	4.85115e-07	1.40114e-05	5.59477	down	Immunity_medium vs Immunity_low
GPR183	1880	0.876159	7.88559	9.73806	1.2512e-19	1.45364e-17	33.895	up	Immunity_medium vs Immunity_low
GPSM3	63940	0.766073	7.3034	13.3426	3.85061e-32	2.25124e-29	62.2661	up	Immunity_medium vs Immunity_low
GVINP1	387751	0.800737	7.58	7.10545	8.92271e-12	4.71473e-10	16.1702	up	Immunity_medium vs Immunity_low
GYPC	2995	0.593642	8.349	5.31053	2.14544e-07	6.57935e-06	6.37973	up	Immunity_medium vs Immunity_low
GZMA	3001	1.24181	7.6382	13.0581	4.16317e-31	2.03928e-28	59.9198	up	Immunity_medium vs Immunity_low
GZMB	3002	1.31484	7.76977	10.6048	1.70404e-22	2.73311e-20	40.3862	up	Immunity_medium vs Immunity_low
GZMH	2999	0.757987	6.77781	8.32296	3.16098e-15	2.5127e-13	23.9425	up	Immunity_medium vs Immunity_low
GZMK	3003	1.41258	7.90123	11.8636	7.76056e-27	2.38394e-24	50.2303	up	Immunity_medium vs Immunity_low
HCLS1	3059	1.10039	9.45099	15.4808	4.78048e-40	1.73283e-36	80.2082	up	Immunity_medium vs Immunity_low
HCST	10870	1.25407	10.0921	16.4671	9.65756e-44	8.75169e-40	88.59	up	Immunity_medium vs Immunity_low
HLA-B	3106	0.964886	12.2515	10.1909	4.11464e-21	5.52398e-19	37.2531	up	Immunity_medium vs Immunity_low
HLA-C	3107	0.613256	7.62617	5.18275	4.04589e-07	1.1827e-05	5.76927	up	Immunity_medium vs Immunity_low
HLA-DMA	3108	1.08561	11.3116	14.8027	1.6106e-37	3.2434e-34	74.4727	up	Immunity_medium vs Immunity_low
HLA-DMB	3109	1.17945	11.0833	16.6941	1.35808e-44	2.46139e-40	90.5223	up	Immunity_medium vs Immunity_low
HLA-DOA	3111	1.09347	8.26815	13.8412	5.76981e-34	4.54661e-31	66.4066	up	Immunity_medium vs Immunity_low
HLA-DOB	3112	0.698551	7.07321	7.21308	4.56836e-12	2.53201e-10	16.8236	up	Immunity_medium vs Immunity_low
HLA-DPA1	3113	1.30386	11.6239	14.1161	5.61747e-35	5.35847e-32	68.7025	up	Immunity_medium vs Immunity_low
HLA-DPB1	3115	0.904912	7.3123	11.8584	8.09679e-27	2.44577e-24	50.1886	up	Immunity_medium vs Immunity_low
HLA-DQA1	3117	1.63424	10.5704	14.2999	1.17673e-35	1.42072e-32	70.2432	up	Immunity_medium vs Immunity_low
HLA-DQB1	3119	0.758702	7.53693	4.3696	1.72236e-05	0.000355132	2.18203	up	Immunity_medium vs Immunity_low
HLA-DRA	3122	1.28608	12.5087	13.633	3.34879e-33	2.52889e-30	64.6733	up	Immunity_medium vs Immunity_low
HLA-DRB4	3126	0.679835	8.21777	2.92685	0.00368853	0.0294888	-2.82405	up	Immunity_medium vs Immunity_low
HLA-E	3133	0.872125	9.56903	13.0901	3.18681e-31	1.60438e-28	60.1832	up	Immunity_medium vs Immunity_low
HLA-F	3134	0.923983	8.51112	9.62896	2.81641e-19	3.11248e-17	33.0975	up	Immunity_medium vs Immunity_low
HLA-G	3135	0.649426	7.28482	6.68905	1.11468e-10	5.27479e-09	13.7086	up	Immunity_medium vs Immunity_low
HLA-H	3136	0.953493	8.85873	6.69716	1.06222e-10	5.06623e-09	13.7556	up	Immunity_medium vs Immunity_low
HSD17B11	51170	0.590294	7.44182	6.16564	2.28638e-09	9.20851e-08	10.7717	up	Immunity_medium vs Immunity_low
ICOS	29851	0.673152	6.79271	9.33177	2.50753e-18	2.5676e-16	30.9489	up	Immunity_medium vs Immunity_low
IDO1	3620	1.29872	7.24919	9.89675	3.81324e-20	4.5769e-18	35.0633	up	Immunity_medium vs Immunity_low
IFI16	3428	0.663481	8.53165	7.61694	3.49305e-13	2.16808e-11	19.3357	up	Immunity_medium vs Immunity_low
IFI27	3429	0.861342	11.7829	5.79424	1.74882e-08	6.33912e-07	8.80006	up	Immunity_medium vs Immunity_low
IFI30	10437	0.787477	8.60027	8.77851	1.33156e-16	1.20065e-14	27.0487	up	Immunity_medium vs Immunity_low
IFI35	3430	0.690225	8.72194	7.71563	1.83828e-13	1.18566e-11	19.9636	up	Immunity_medium vs Immunity_low
IFI44L	10964	0.620795	8.93086	3.98672	8.43836e-05	0.00140956	0.678511	up	Immunity_medium vs Immunity_low
IFITM1	8519	0.599901	11.0412	4.83393	2.1502e-06	5.4965e-05	4.16649	up	Immunity_medium vs Immunity_low
IGFLR1	79713	0.742784	7.68556	10.4347	6.34866e-22	9.5886e-20	39.0919	up	Immunity_medium vs Immunity_low
IGHG1	3500	1.89317	9.19122	7.1856	5.42331e-12	2.95633e-10	16.6561	up	Immunity_medium vs Immunity_low
IGKC	3514	1.97702	11.5155	7.39972	1.40829e-12	8.18073e-11	17.9729	up	Immunity_medium vs Immunity_low
IGLL1	3543	1.33628	12.5198	6.38914	6.4304e-10	2.76172e-08	12.0037	up	Immunity_medium vs Immunity_low
IGSF6	10261	0.886384	7.33	12.6089	1.7369e-29	7.32085e-27	56.2429	up	Immunity_medium vs Immunity_low
IL10RA	3587	0.821151	7.33048	14.7325	2.93695e-37	4.83902e-34	73.8806	up	Immunity_medium vs Immunity_low
IL18BP	10068	0.994702	8.75959	13.0205	5.69734e-31	2.71733e-28	59.6106	up	Immunity_medium vs Immunity_low
IL21R	50615	0.616073	6.49961	9.78093	9.08453e-20	1.07613e-17	34.2097	up	Immunity_medium vs Immunity_low
IL23A	51561	1.408	8.39482	12.4629	5.7928e-29	2.38611e-26	55.0559	up	Immunity_medium vs Immunity_low
IL32	9235	0.818105	8.22478	7.67881	2.33709e-13	1.49146e-11	19.7288	up	Immunity_medium vs Immunity_low
IL7R	3575	1.0973	7.96319	10.85	2.51785e-23	4.37751e-21	42.2684	up	Immunity_medium vs Immunity_low
IRF1	3659	1.0354	9.45833	11.4138	2.90309e-25	6.66019e-23	46.6627	up	Immunity_medium vs Immunity_low
IRF7	3665	0.620428	8.90437	6.12359	2.89214e-09	1.1495e-07	10.5437	up	Immunity_medium vs Immunity_low
IRF8	3394	1.09688	8.78722	12.9914	7.25983e-31	3.37377e-28	59.3718	up	Immunity_medium vs Immunity_low
ISG20	3669	0.683412	9.67206	6.08326	3.61927e-09	1.41066e-07	10.3261	up	Immunity_medium vs Immunity_low
ITGAX	3687	0.614575	7.58705	7.9696	3.43989e-14	2.34378e-12	21.6039	up	Immunity_medium vs Immunity_low
ITGB2	3689	1.0702	11.0068	13.9378	2.54756e-34	2.09873e-31	67.2123	up	Immunity_medium vs Immunity_low
ITGB7	3695	0.763771	7.48657	9.29097	3.37608e-18	3.39934e-16	30.6567	up	Immunity_medium vs Immunity_low
ITK	3702	0.811627	6.94901	10.9309	1.33444e-23	2.39459e-21	42.8934	up	Immunity_medium vs Immunity_low
ITM2A	9452	0.809243	8.9469	5.85141	1.28642e-08	4.72921e-07	9.09726	up	Immunity_medium vs Immunity_low
JAML	120425	0.775217	7.17827	11.4197	2.76771e-25	6.43102e-23	46.7097	up	Immunity_medium vs Immunity_low
JCHAIN	3512	1.28192	8.26715	6.3578	7.69758e-10	3.28261e-08	11.8289	up	Immunity_medium vs Immunity_low
KLRB1	3820	0.977253	7.20207	10.9222	1.42978e-23	2.54052e-21	42.8254	up	Immunity_medium vs Immunity_low
LAG3	3902	0.838562	7.27396	7.68316	2.27182e-13	1.45493e-11	19.7565	up	Immunity_medium vs Immunity_low
LAMP3	27074	0.602745	7.83118	4.31453	2.18015e-05	0.000440012	1.95827	up	Immunity_medium vs Immunity_low
LAP3	51056	0.631444	9.5574	8.29057	3.94443e-15	3.06819e-13	23.7255	up	Immunity_medium vs Immunity_low
LAPTM5	7805	0.932981	9.25537	12.4122	8.78832e-29	3.4626e-26	54.6452	up	Immunity_medium vs Immunity_low
LAT2	7462	0.585286	7.08956	10.0857	9.15219e-21	1.17641e-18	36.4668	up	Immunity_medium vs Immunity_low
LCP1	3936	1.00888	10.9465	10.9446	1.19838e-23	2.17195e-21	42.9993	up	Immunity_medium vs Immunity_low
LGALS3BP	3959	0.760167	9.26881	6.19597	1.92845e-09	7.88966e-08	10.937	up	Immunity_medium vs Immunity_low
LILRB3	11025	0.653635	7.38818	8.89644	5.77447e-17	5.45086e-15	27.8686	up	Immunity_medium vs Immunity_low
LILRB4	11006	0.881026	7.1907	12.3252	1.79649e-28	6.78323e-26	53.9406	up	Immunity_medium vs Immunity_low
LIPA	3988	0.587655	9.79116	5.97855	6.44622e-09	2.42892e-07	9.76651	up	Immunity_medium vs Immunity_low
LPXN	9404	0.821974	9.36793	11.8554	8.29201e-27	2.46368e-24	50.1651	up	Immunity_medium vs Immunity_low
LST1	7940	0.868495	7.51215	12.3054	2.11396e-28	7.81907e-26	53.7803	up	Immunity_medium vs Immunity_low
LTB	4050	1.28709	8.80572	8.51841	8.22062e-16	6.83443e-14	25.263	up	Immunity_medium vs Immunity_low
LUM	4060	0.71015	10.9964	4.29309	2.38814e-05	0.000477207	1.87183	up	Immunity_medium vs Immunity_low
LY86	9450	0.70802	8.11456	9.31484	2.83705e-18	2.88869e-16	30.8276	up	Immunity_medium vs Immunity_low
LY96	23643	0.862422	9.35888	12.4264	7.82216e-29	3.15042e-26	54.7599	up	Immunity_medium vs Immunity_low
LYL1	4066	0.634536	8.41861	9.29745	3.22039e-18	3.26069e-16	30.7031	up	Immunity_medium vs Immunity_low
LYZ	4069	1.46836	9.48829	9.10192	1.32709e-17	1.28621e-15	29.3123	up	Immunity_medium vs Immunity_low
MAL	4118	0.768292	6.84197	6.65536	1.36105e-10	6.37406e-09	13.5142	up	Immunity_medium vs Immunity_low
MAP4K1	11184	0.855312	7.6105	9.75128	1.13362e-19	1.32554e-17	33.992	up	Immunity_medium vs Immunity_low
MARCO	8685	0.587242	6.86361	3.45789	0.000623989	0.00753127	-1.19295	up	Immunity_medium vs Immunity_low
MMP12	4321	0.764417	7.21067	3.90731	0.000115617	0.00184458	0.382142	up	Immunity_medium vs Immunity_low
MS4A6A	64231	1.05083	8.86657	10.744	5.76821e-23	9.77038e-21	41.4524	up	Immunity_medium vs Immunity_low
MS4A7	58475	0.585063	7.56207	6.26178	1.33017e-09	5.54208e-08	11.2976	up	Immunity_medium vs Immunity_low
MZB1	51237	1.25551	8.26989	6.901	3.12325e-11	1.56803e-09	14.9482	up	Immunity_medium vs Immunity_low
NAPSB	256236	0.857384	7.63321	7.98836	3.03509e-14	2.09954e-12	21.7265	up	Immunity_medium vs Immunity_low
NCF1	653361	0.686648	6.67589	10.8858	1.90281e-23	3.3482e-21	42.5441	up	Immunity_medium vs Immunity_low
NCF4	4689	0.680654	6.93465	13.591	4.76808e-33	3.32372e-30	64.325	up	Immunity_medium vs Immunity_low
NCKAP1L	3071	0.585655	6.80672	11.4297	2.5562e-25	6.01669e-23	46.788	up	Immunity_medium vs Immunity_low
NFS1	9054	1.0259	8.06121	10.3723	1.02647e-21	1.47649e-19	38.6191	up	Immunity_medium vs Immunity_low
NKG7	4818	1.31421	8.07654	11.6416	4.66739e-26	1.20845e-23	48.463	up	Immunity_medium vs Immunity_low
NPL	80896	0.626185	7.69539	8.35751	2.49471e-15	1.99181e-13	24.1745	up	Immunity_medium vs Immunity_low
P2RY8	286530	0.74636	6.82126	8.84808	8.14045e-17	7.48921e-15	27.5316	up	Immunity_medium vs Immunity_low
PARVG	64098	0.72556	7.62883	11.8257	1.05542e-26	3.08523e-24	49.9274	up	Immunity_medium vs Immunity_low
PCED1B	91523	0.727373	8.18228	8.07212	1.73208e-14	1.23106e-12	22.2758	up	Immunity_medium vs Immunity_low
PIM2	11040	0.93707	8.25519	7.97592	3.29778e-14	2.25543e-12	21.6452	up	Immunity_medium vs Immunity_low
PLAAT4	5920	1.25041	10.5867	8.1926	7.68143e-15	5.68238e-13	23.0723	up	Immunity_medium vs Immunity_low
PLAC8	51316	0.719953	6.86428	6.92232	2.74397e-11	1.39305e-09	15.0744	up	Immunity_medium vs Immunity_low
PLEK	5341	1.18836	8.57675	16.2445	6.6035e-43	3.98939e-39	86.6961	up	Immunity_medium vs Immunity_low
POU2AF1	5450	0.650897	6.41862	6.42131	5.34309e-10	2.32226e-08	12.1838	up	Immunity_medium vs Immunity_low
PPP1R16B	26051	0.638948	6.82576	7.25613	3.4885e-12	1.9454e-10	17.0869	up	Immunity_medium vs Immunity_low
PPP1R1B	84152	-0.76633	8.60309	-3.1049	0.00208702	0.0194374	-2.30544	down	Immunity_medium vs Immunity_low
PRDM1	639	0.73741	7.83331	10.0515	1.18615e-20	1.4929e-18	36.2117	up	Immunity_medium vs Immunity_low
PRF1	5551	0.728794	6.55133	10.7094	7.55852e-23	1.26843e-20	41.1863	up	Immunity_medium vs Immunity_low
PRKCB	5579	1.06876	7.53438	11.6311	5.07511e-26	1.29551e-23	48.3805	up	Immunity_medium vs Immunity_low
PSMB10	5699	0.675366	10.7545	10.5497	2.61132e-22	4.07996e-20	39.9661	up	Immunity_medium vs Immunity_low
PSMB8	5696	0.717324	7.76162	7.98313	3.14308e-14	2.15777e-12	21.6923	up	Immunity_medium vs Immunity_low
PSMB9	5698	1.15167	8.48445	11.5335	1.11214e-25	2.76117e-23	47.6077	up	Immunity_medium vs Immunity_low
PSME2	5721	0.60275	10.1579	8.41913	1.63314e-15	1.32138e-13	24.5899	up	Immunity_medium vs Immunity_low
PTGDS	5730	0.992562	8.03652	6.32994	9.02676e-10	3.80467e-08	11.6742	up	Immunity_medium vs Immunity_low
PTPN7	5778	0.620854	6.61071	9.21646	5.80064e-18	5.71363e-16	30.1251	up	Immunity_medium vs Immunity_low
PTPRCAP	5790	0.814259	6.9594	10.0214	1.48928e-20	1.83618e-18	35.9879	up	Immunity_medium vs Immunity_low
PVRIG	79037	0.870346	6.7198	10.7852	4.18334e-23	7.15272e-21	41.7686	up	Immunity_medium vs Immunity_low
PYHIN1	149628	0.591191	6.5549	10.2917	1.90424e-21	2.6548e-19	38.0111	up	Immunity_medium vs Immunity_low
RAC2	5880	1.2368	9.49132	14.5583	1.30054e-36	1.81315e-33	72.414	up	Immunity_medium vs Immunity_low
RAP1GAP	5909	-0.598363	7.98782	-4.20496	3.45992e-05	0.000659387	1.52053	down	Immunity_medium vs Immunity_low
RARRES1	5918	0.686507	10.2755	3.22612	0.0013949	0.0141713	-1.93597	up	Immunity_medium vs Immunity_low
RASAL3	64926	0.919567	8.23634	10.1386	6.12434e-21	8.0433e-19	36.8619	up	Immunity_medium vs Immunity_low
RASSF5	83593	0.728704	8.06604	9.60175	3.44543e-19	3.71696e-17	32.8993	up	Immunity_medium vs Immunity_low
RENBP	5973	0.653409	8.28491	8.19353	7.63337e-15	5.68238e-13	23.0785	up	Immunity_medium vs Immunity_low
RFTN1	23180	0.671318	9.44702	8.68192	2.62735e-16	2.31156e-14	26.3818	up	Immunity_medium vs Immunity_low
RGS1	5996	1.0565	8.84294	8.6671	2.91499e-16	2.53996e-14	26.2799	up	Immunity_medium vs Immunity_low
RNASE6	6039	0.778491	7.39318	11.1127	3.18347e-24	6.34036e-22	44.3044	up	Immunity_medium vs Immunity_low
RNF126P1	376412	0.92064	6.51832	5.36613	1.62196e-07	5.11243e-06	6.64917	up	Immunity_medium vs Immunity_low
RTP4	64108	0.590292	6.96582	5.9943	5.91292e-09	2.25138e-07	9.8502	up	Immunity_medium vs Immunity_low
RUNX3	864	0.640922	8.81709	5.69644	2.94203e-08	1.03136e-06	8.29696	up	Immunity_medium vs Immunity_low
S100A4	6275	0.804814	10.9801	7.02873	1.43197e-11	7.39401e-10	15.7086	up	Immunity_medium vs Immunity_low
SAA1	6288	0.672868	8.01256	3.54284	0.000459498	0.00585239	-0.908699	up	Immunity_medium vs Immunity_low
SAMSN1	64092	0.683367	6.71922	13.323	4.53671e-32	2.49162e-29	62.1045	up	Immunity_medium vs Immunity_low
SASH3	54440	0.72384	7.25519	10.3977	8.44506e-22	1.23434e-19	38.8111	up	Immunity_medium vs Immunity_low
SBK1	388228	-0.639466	8.48911	-4.6146	5.86526e-06	0.000138055	3.20753	down	Immunity_medium vs Immunity_low
SELL	6402	0.773706	6.74965	7.74742	1.49313e-13	9.73437e-12	20.1671	up	Immunity_medium vs Immunity_low
SERPINA1	5265	0.974674	8.57203	8.03627	2.20303e-14	1.54161e-12	22.0403	up	Immunity_medium vs Immunity_low
SERPINF1	5176	0.61309	8.20859	6.21404	1.74205e-09	7.1594e-08	11.0356	up	Immunity_medium vs Immunity_low
SERPING1	710	0.667994	9.38537	7.89277	5.73159e-14	3.83319e-12	21.1041	up	Immunity_medium vs Immunity_low
SKAP1	8631	0.768615	7.40026	8.00257	2.76036e-14	1.91681e-12	21.8194	up	Immunity_medium vs Immunity_low
SLA	6503	0.628442	6.89348	12.6837	9.35329e-30	4.13461e-27	56.8528	up	Immunity_medium vs Immunity_low
SLC15A3	51296	0.94257	9.90016	11.3754	3.94554e-25	8.82828e-23	46.3605	up	Immunity_medium vs Immunity_low
SLC1A3	6507	0.615925	7.96079	6.40934	5.72468e-10	2.48215e-08	12.1167	up	Immunity_medium vs Immunity_low
SLC2A3	6515	0.594425	9.5329	6.56616	2.30135e-10	1.04274e-08	13.003	up	Immunity_medium vs Immunity_low
SLC7A7	9056	0.936157	8.85919	13.4655	1.37135e-32	8.57047e-30	63.2837	up	Immunity_medium vs Immunity_low
SLCO2B1	11309	0.895068	9.00038	11.5508	9.67892e-26	2.4364e-23	47.7446	up	Immunity_medium vs Immunity_low
SLFN11	91607	0.6633	8.42404	9.62131	2.98072e-19	3.27409e-17	33.0417	up	Immunity_medium vs Immunity_low
SOD2	6648	0.589175	9.58571	4.3806	1.64271e-05	0.000339481	2.22701	up	Immunity_medium vs Immunity_low
SPI1	6688	0.636125	7.25768	10.6631	1.08332e-22	1.76784e-20	40.832	up	Immunity_medium vs Immunity_low
SPOCK2	9806	0.916941	8.93788	6.34571	8.24906e-10	3.50131e-08	11.7617	up	Immunity_medium vs Immunity_low
SRGN	5552	1.24067	9.87902	11.4455	2.2518e-25	5.36994e-23	46.9129	up	Immunity_medium vs Immunity_low
STAT1	6772	0.947699	10.8856	7.48928	7.95103e-13	4.72474e-11	18.5316	up	Immunity_medium vs Immunity_low
STAT4	6775	0.772251	7.06808	11.2256	1.30008e-24	2.77207e-22	45.1862	up	Immunity_medium vs Immunity_low
STX11	8676	0.693258	6.97264	11.4924	1.54726e-25	3.73902e-23	47.2825	up	Immunity_medium vs Immunity_low
SYK	6850	0.623464	8.30794	8.72327	1.96516e-16	1.74591e-14	26.6667	up	Immunity_medium vs Immunity_low
TAP1	6890	0.951643	11.0597	7.98706	3.06156e-14	2.1098e-12	21.718	up	Immunity_medium vs Immunity_low
TBC1D10C	374403	0.940958	7.3168	10.0258	1.44129e-20	1.78917e-18	36.0201	up	Immunity_medium vs Immunity_low
TBXAS1	6916	0.707627	7.47801	10.3926	8.78107e-22	1.27319e-19	38.7727	up	Immunity_medium vs Immunity_low
TENT5C	54855	1.08305	8.57828	6.60029	1.88351e-10	8.64221e-09	13.198	up	Immunity_medium vs Immunity_low
TGM2	7052	0.714015	8.20497	8.06037	1.87432e-14	1.32696e-12	22.1985	up	Immunity_medium vs Immunity_low
TLR7	51284	0.643457	7.08191	8.30418	3.59426e-15	2.83227e-13	23.8166	up	Immunity_medium vs Immunity_low
TLR8	51311	0.691023	6.47653	11.9681	3.32226e-27	1.07523e-24	51.0662	up	Immunity_medium vs Immunity_low
TMEM119	338773	0.725209	8.78687	6.12927	2.80196e-09	1.11856e-07	10.5744	up	Immunity_medium vs Immunity_low
TMEM140	55281	0.636556	8.02198	10.4888	4.18198e-22	6.36926e-20	39.5026	up	Immunity_medium vs Immunity_low
TMEM176A	55365	0.607451	7.4075	7.48853	7.98975e-13	4.73223e-11	18.5268	up	Immunity_medium vs Immunity_low
TNFRSF14	8764	0.684283	9.94174	9.37979	1.7655e-18	1.82846e-16	31.2936	up	Immunity_medium vs Immunity_low
TNFRSF17	608	0.870525	6.63705	7.04521	1.29398e-11	6.71981e-10	15.8075	up	Immunity_medium vs Immunity_low
TNFRSF1B	7133	0.61682	7.03028	11.7643	1.73318e-26	4.90264e-24	49.4388	up	Immunity_medium vs Immunity_low
TNFRSF4	7293	0.61299	7.70968	10.4056	7.94287e-22	1.17038e-19	38.8714	up	Immunity_medium vs Immunity_low
TNFSF13B	10673	1.0858	8.6799	10.2353	2.93106e-21	4.05516e-19	37.5868	up	Immunity_medium vs Immunity_low
TRAF3IP3	80342	0.605455	6.85078	7.17285	5.87155e-12	3.1766e-10	16.5786	up	Immunity_medium vs Immunity_low
TRDV2	28517	1.17121	7.68054	11.9006	5.74745e-27	1.79598e-24	50.5262	up	Immunity_medium vs Immunity_low
TRPV2	51393	0.615914	7.28142	10.2333	2.97719e-21	4.08777e-19	37.5714	up	Immunity_medium vs Immunity_low
TXNIP	10628	0.603351	9.86139	7.37068	1.69344e-12	9.74345e-11	17.7928	up	Immunity_medium vs Immunity_low
TYMP	1890	0.606918	11.7081	6.23525	1.54554e-09	6.38071e-08	11.1518	up	Immunity_medium vs Immunity_low
TYROBP	7305	1.11682	10.6713	13.3265	4.40551e-32	2.49162e-29	62.1335	up	Immunity_medium vs Immunity_low
UBD	10537	1.7443	9.29366	8.2612	4.81921e-15	3.71674e-13	23.5292	up	Immunity_medium vs Immunity_low
UBE2L6	9246	0.716172	7.86576	8.28566	4.07887e-15	3.1592e-13	23.6926	up	Immunity_medium vs Immunity_low
VAMP5	10791	0.842699	9.42675	11.9526	3.76797e-27	1.19808e-24	50.9421	up	Immunity_medium vs Immunity_low
VCAM1	7412	0.973433	9.51929	8.70121	2.29465e-16	2.0287e-14	26.5146	up	Immunity_medium vs Immunity_low
VSIG4	11326	0.633071	6.90446	7.15412	6.59745e-12	3.54814e-10	16.4648	up	Immunity_medium vs Immunity_low
WARS1	7453	0.871323	10.3804	8.14866	1.03417e-14	7.52743e-13	22.781	up	Immunity_medium vs Immunity_low
WAS	7454	0.923272	9.06216	13.3464	3.73115e-32	2.25124e-29	62.2972	up	Immunity_medium vs Immunity_low
WIPF1	7456	0.614726	7.52558	10.0753	9.90362e-21	1.26404e-18	36.3891	up	Immunity_medium vs Immunity_low
XAF1	54739	0.665088	8.88119	5.79655	1.7274e-08	6.27404e-07	8.81198	up	Immunity_medium vs Immunity_low
ZNF683	257101	0.756359	6.73085	8.11883	1.26486e-14	9.09692e-13	22.5837	up	Immunity_medium vs Immunity_low
